# Supplementary material
Source: publisher site journal article supplement (https://www.dovepress.com/article/supplementary_file/550648/Supplementary%20Material.docx)
Supplement: Supplementary file 1 [file Supplementary%20Material.docx]

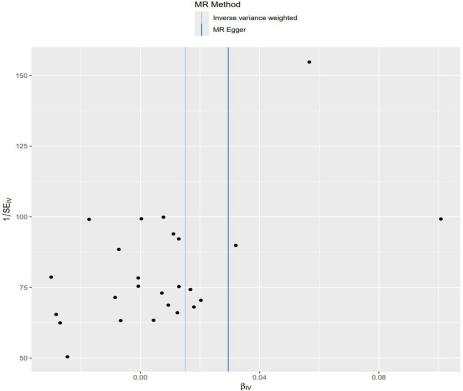

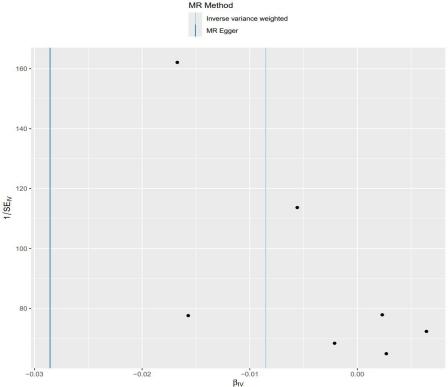
**Supplementary Figure S1:** Funnel plots to visualize overall heterogeneity of MR estimates for the 141 genes on Asthma LCN2 IL18RAP


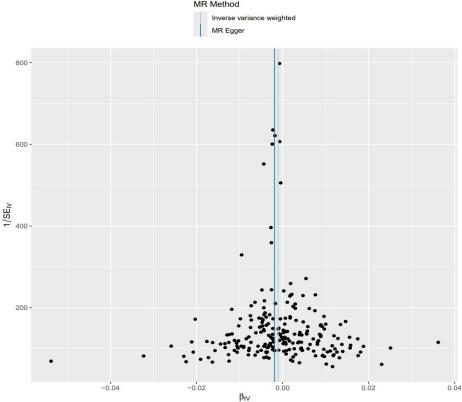

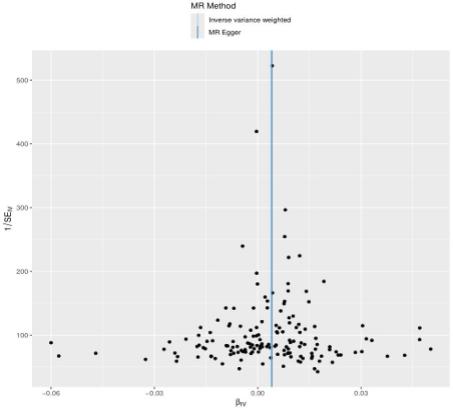
SIGLEC9 FGF2


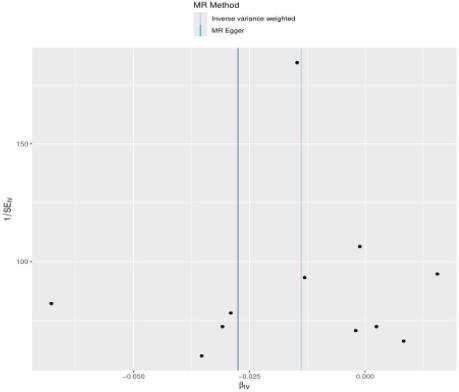

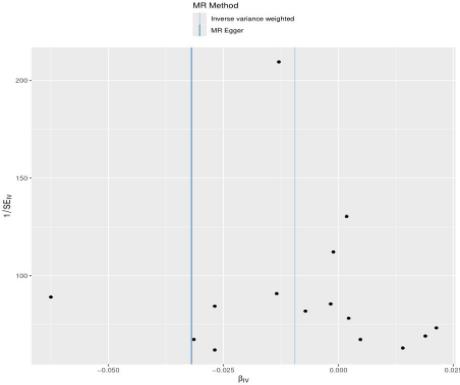
IL13 AURKA


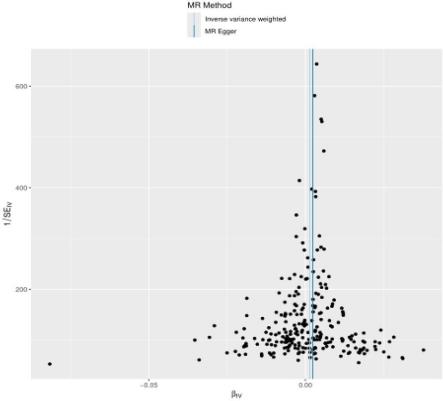

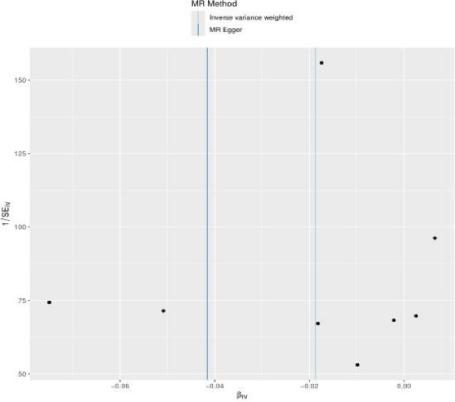
CD33 TMPRSS15


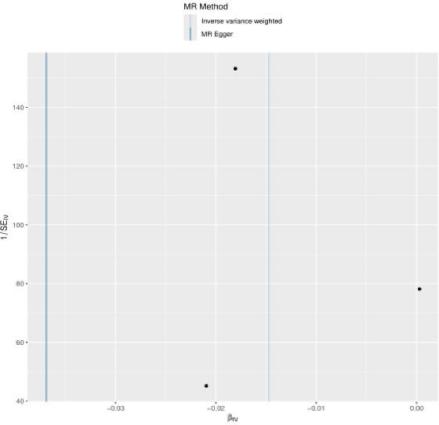

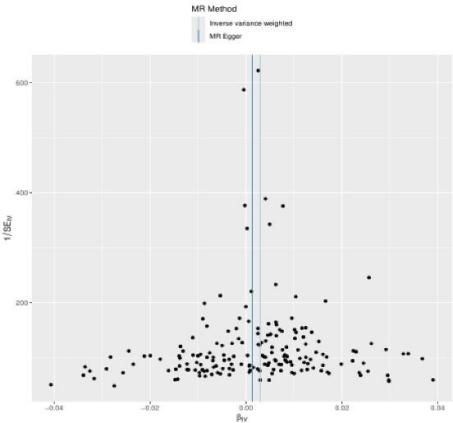
KREMEN2 CA6


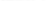

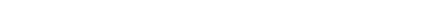


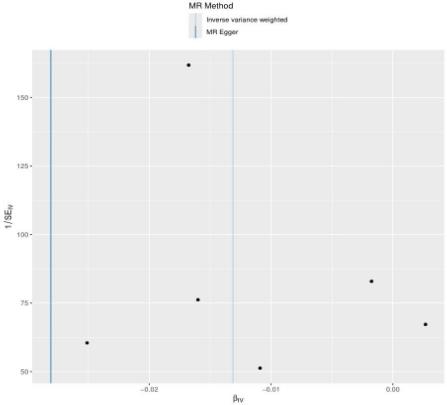

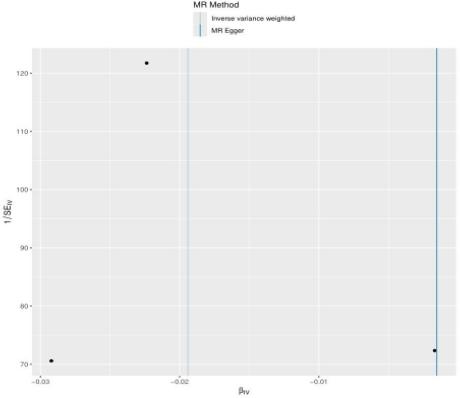
CD207 PLK1


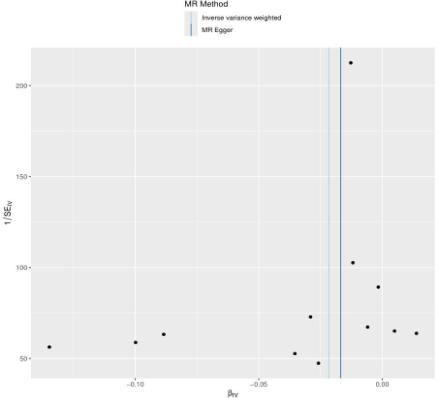

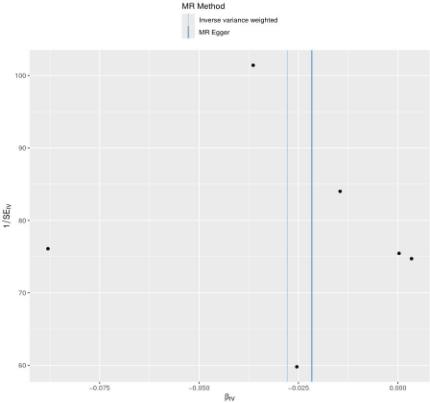
PTPN2

CXCL8


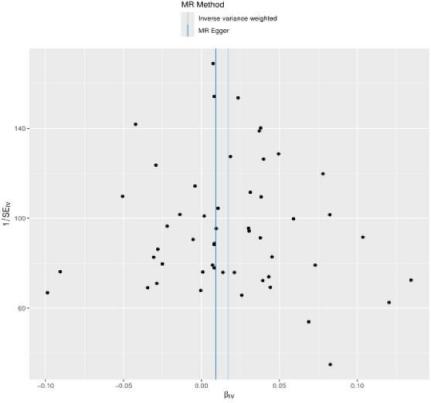

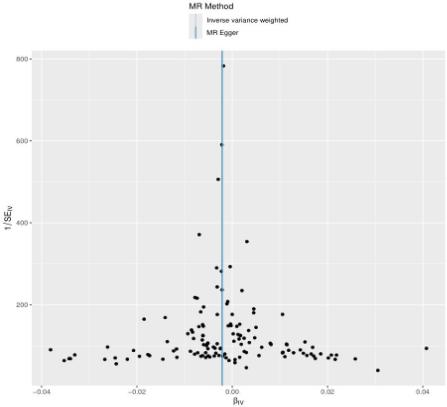

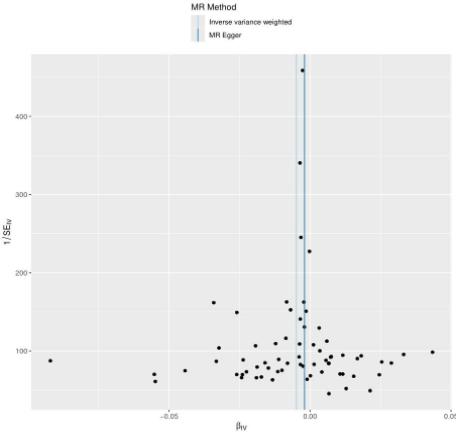
B2M SERPINA1

MMEL1 TEK


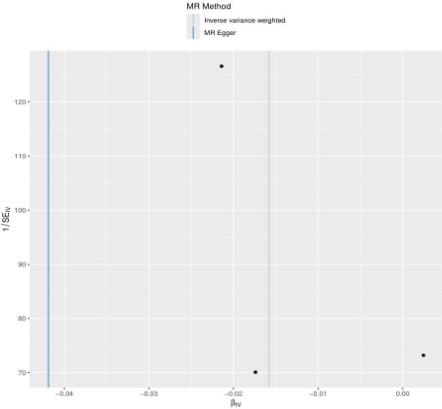

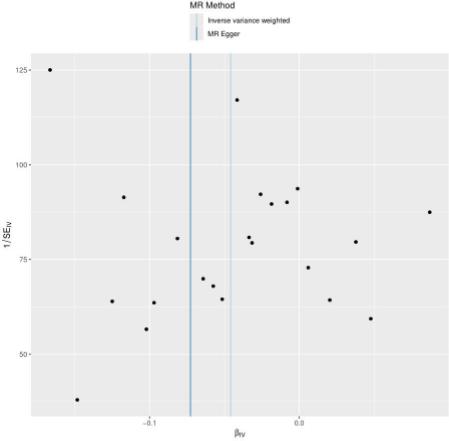

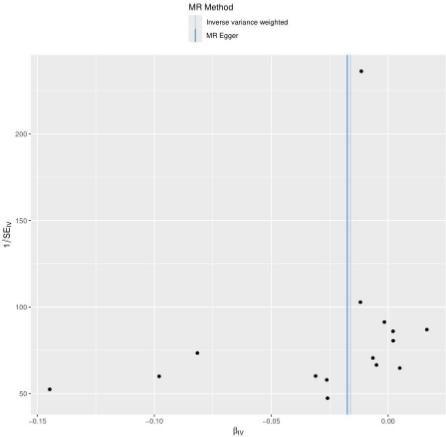
HSPA1A CCL24


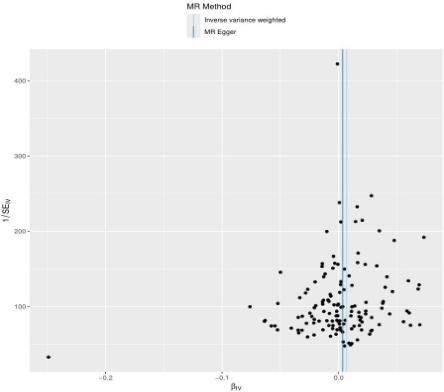

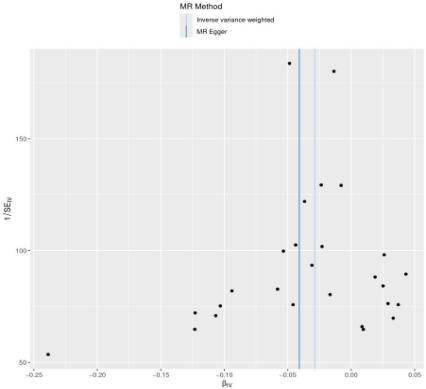
CFB GZMB


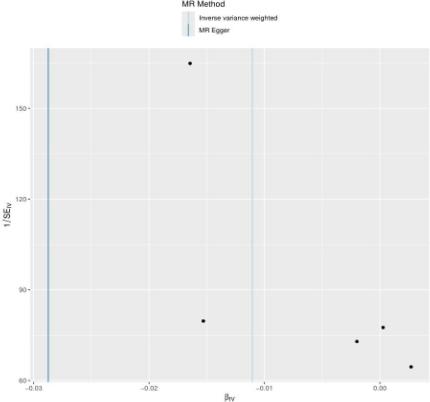

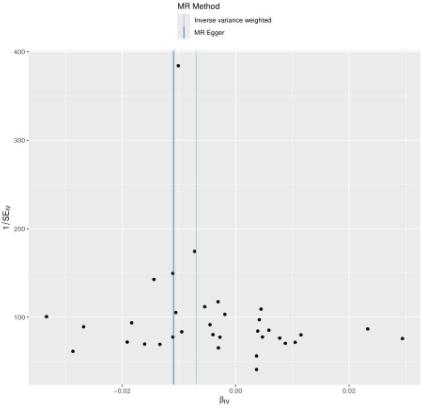
XCL1 IGF1R

PSMA2 FCRL3


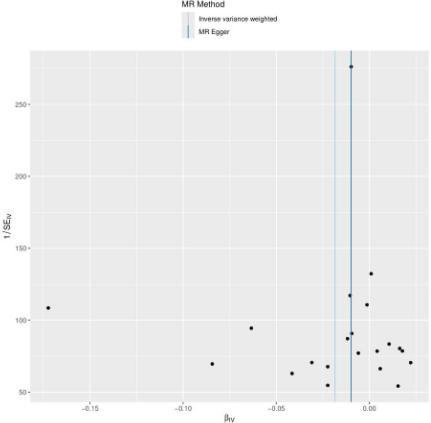

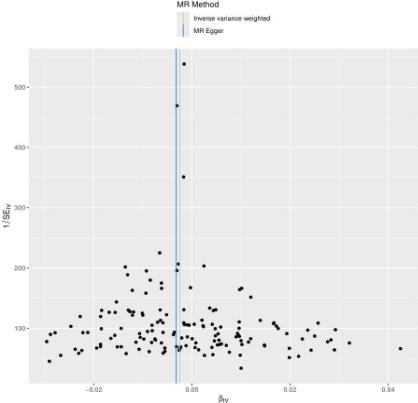


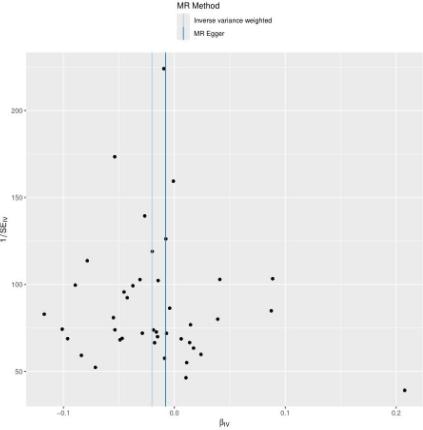

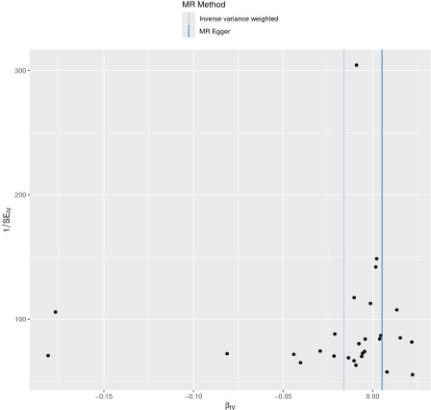
CCL19 ATP5B


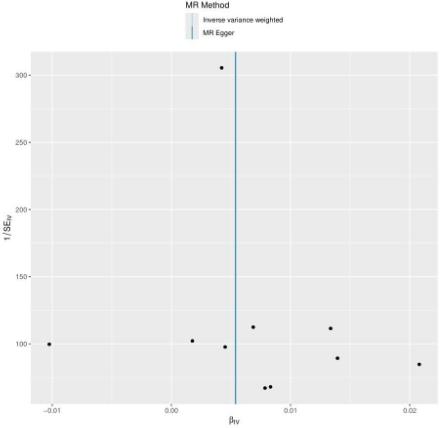

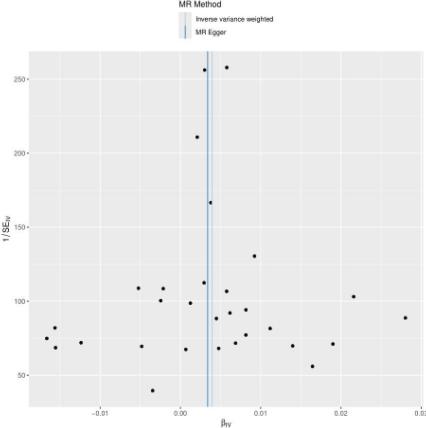
HPGD UCHL1


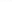


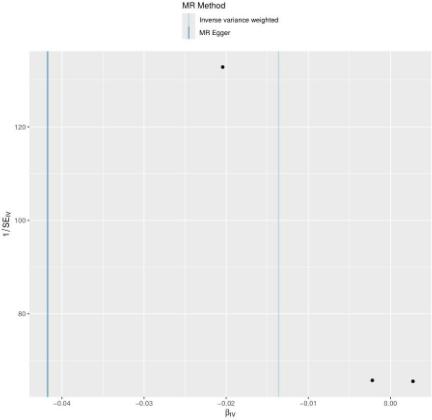
SPTAN1 JAG1


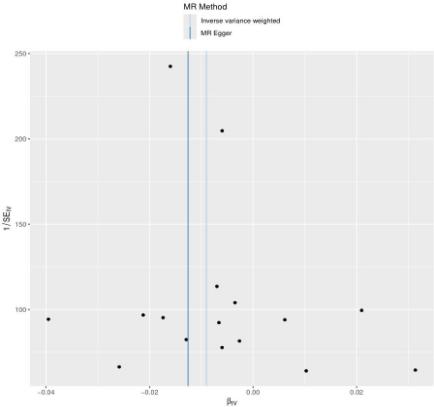


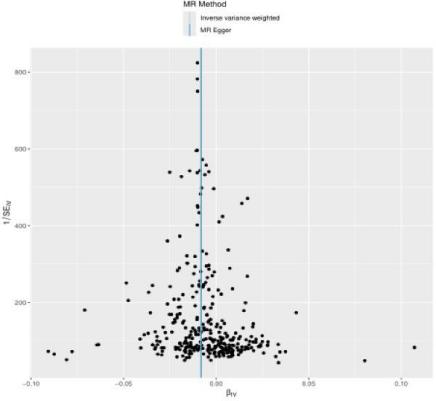

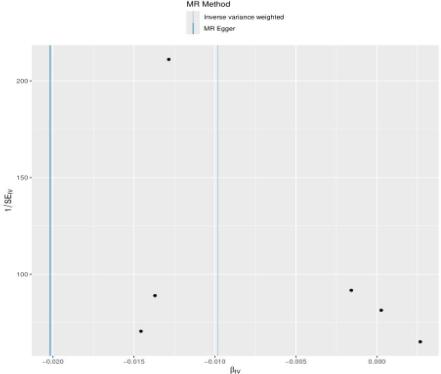
MICB TGFBR2


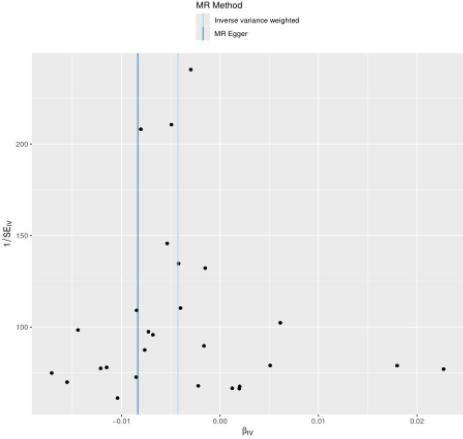

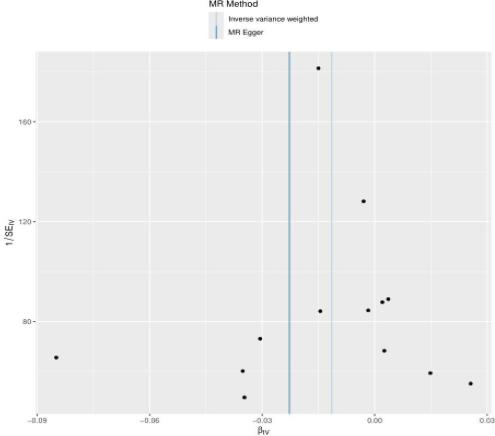
UNC5C GCKR


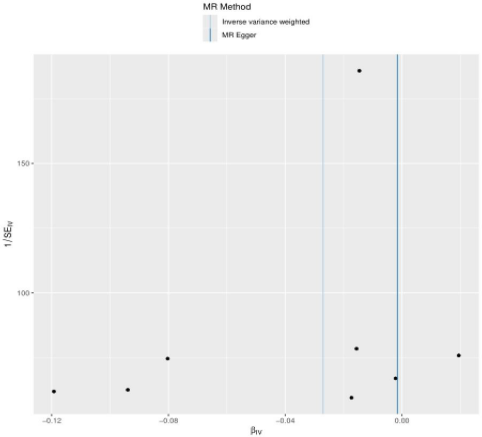

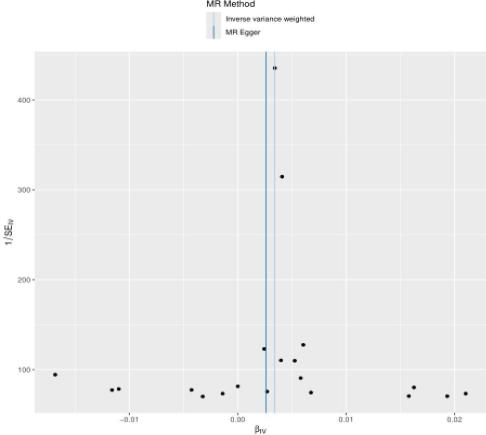
STK17B GPC6


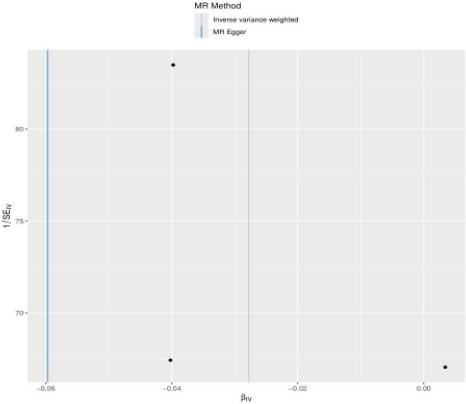

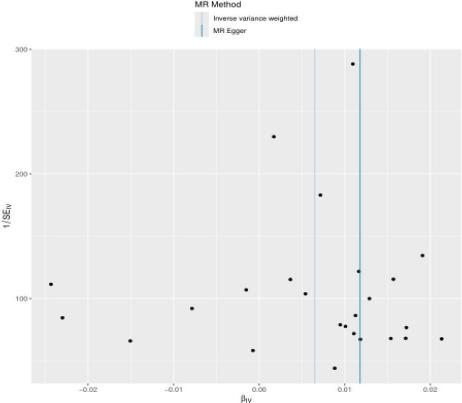
IL17RC SNRPF


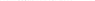

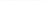


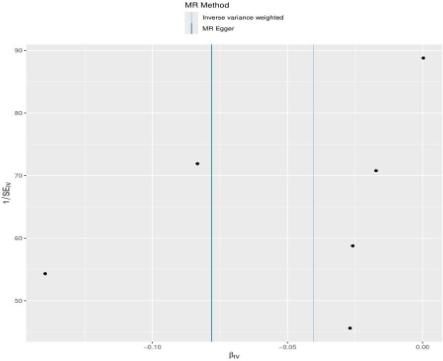

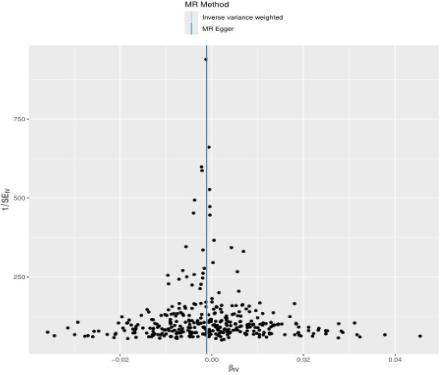

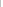
ZPLD1 CTRB2


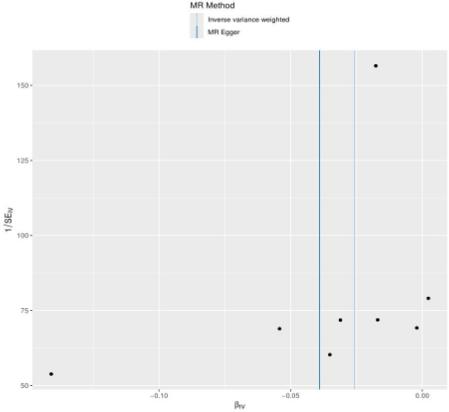

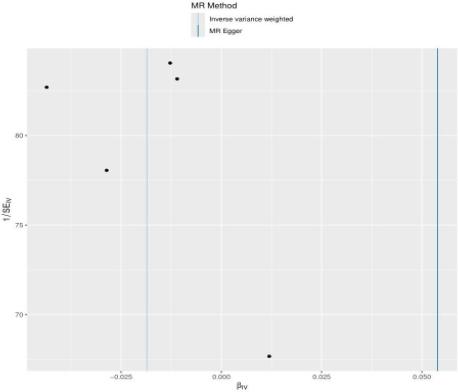
SEMA3B GZMM


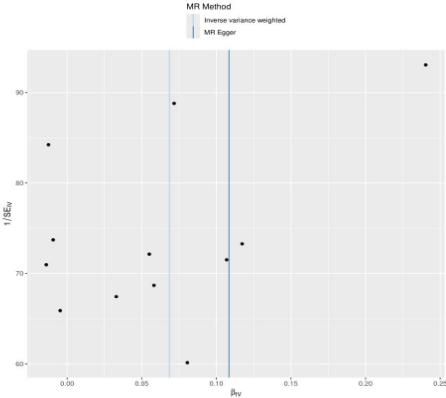
IFNL3 IFNA6


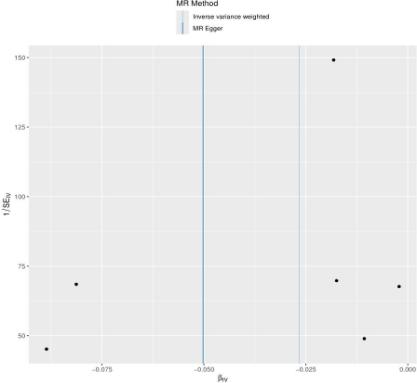


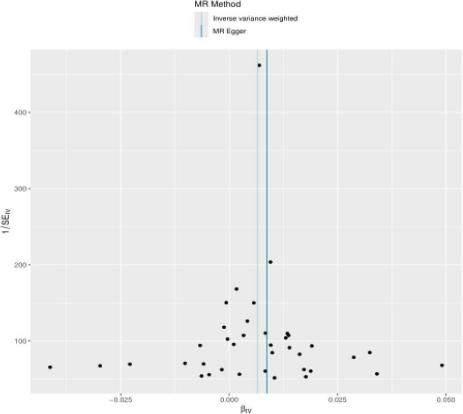

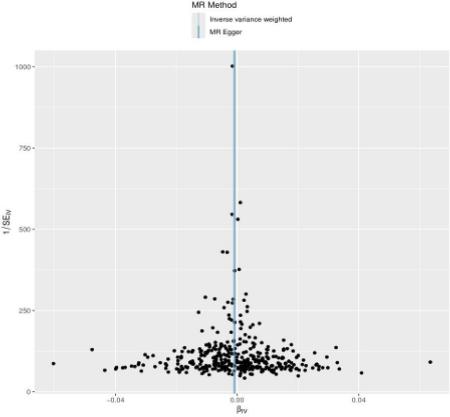
CSAG1 ACP6

LEPRE1 MANBA


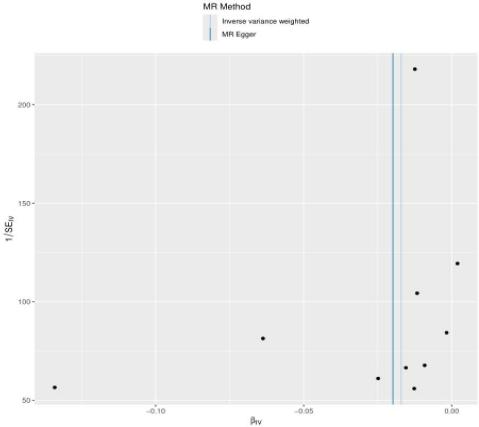

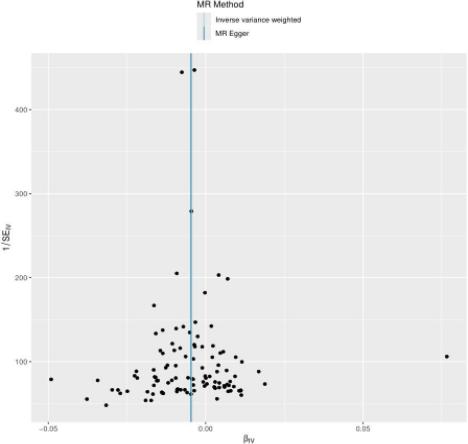

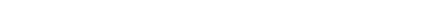


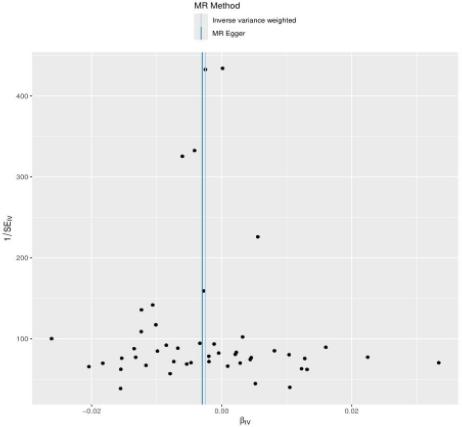

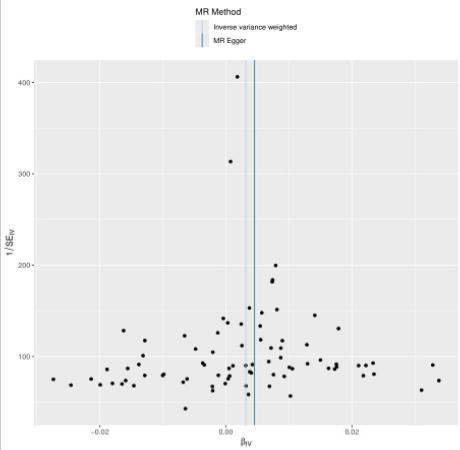
VWA1 CCDC126


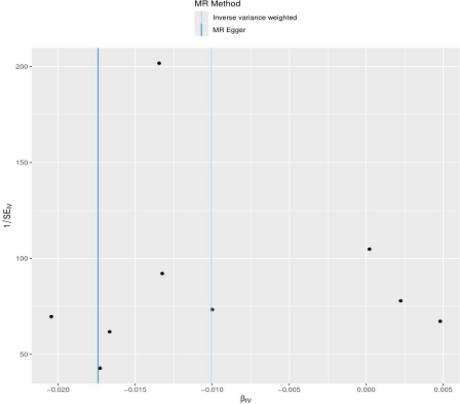

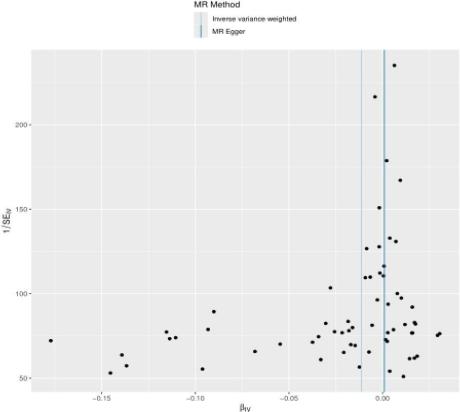
APOC3 PLBD2


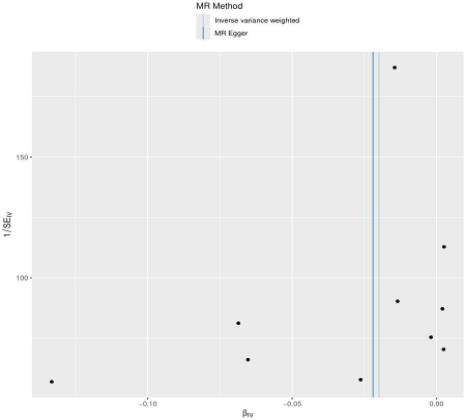

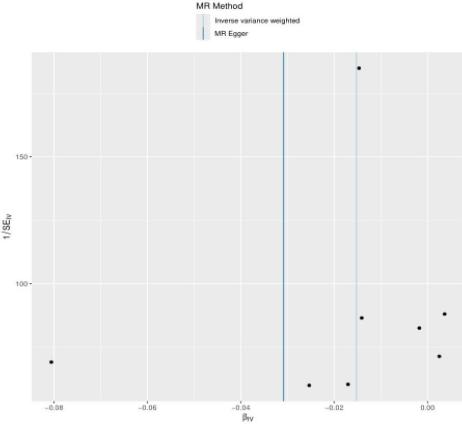
SAYSD1 NDNF


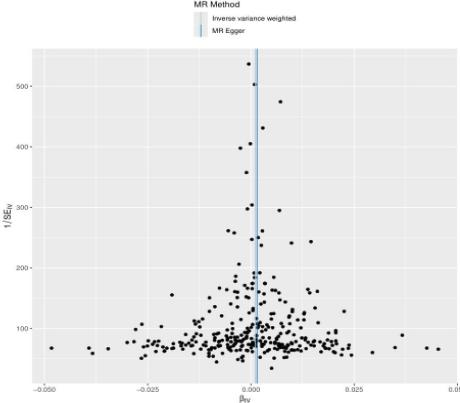

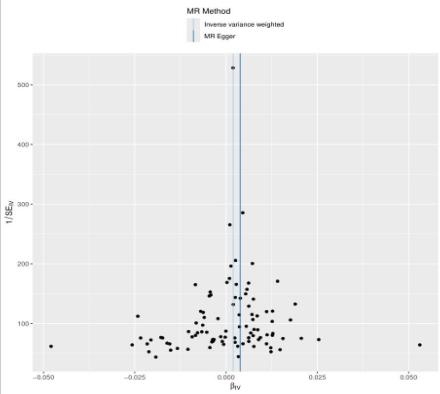

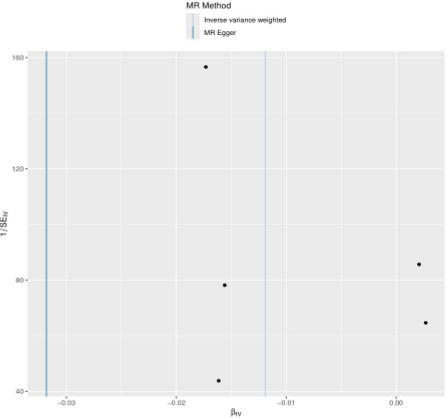

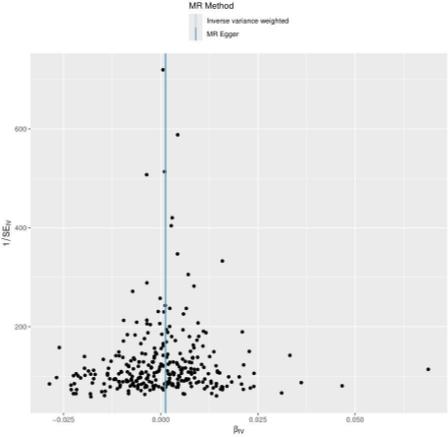
LRP11 CNTNAP2

MRPL52 S100A13


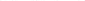

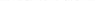


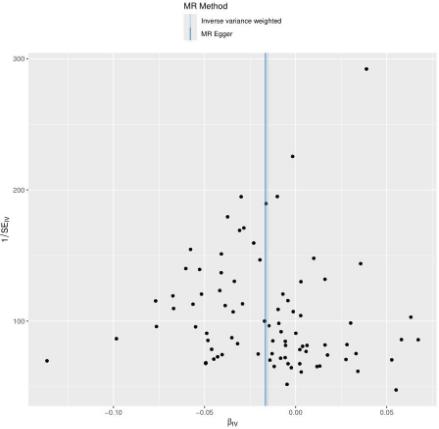

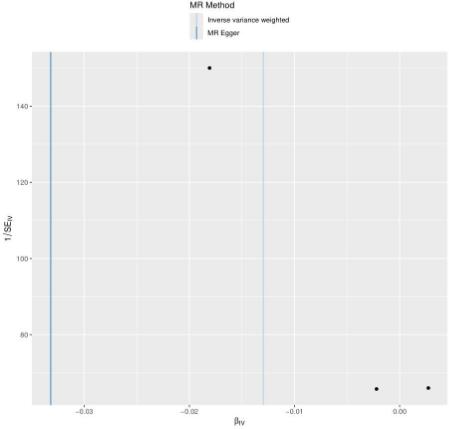
HLA IGFBPL1


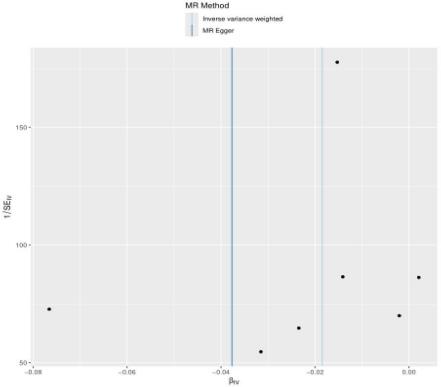

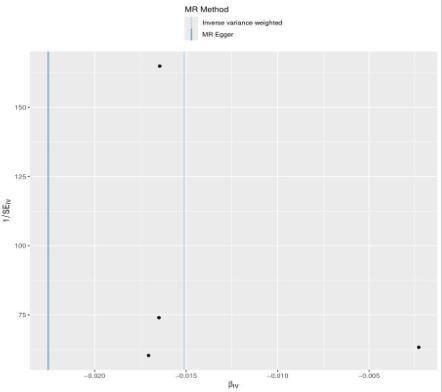
C1D SMR3A

SPTLC1 ST8SIA2


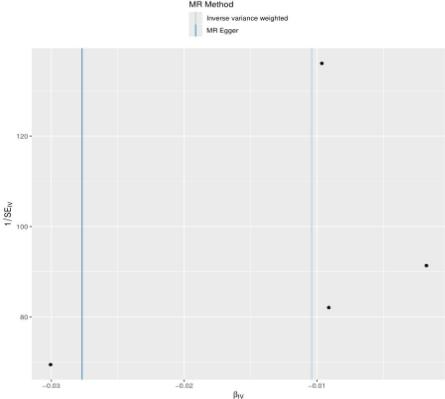

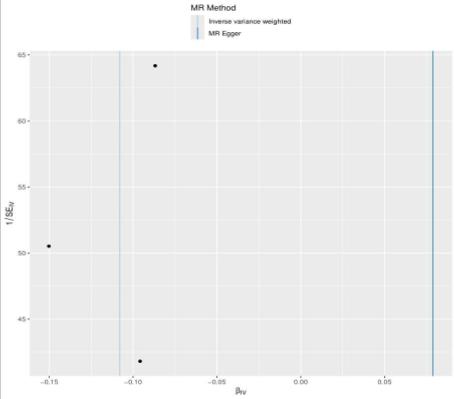

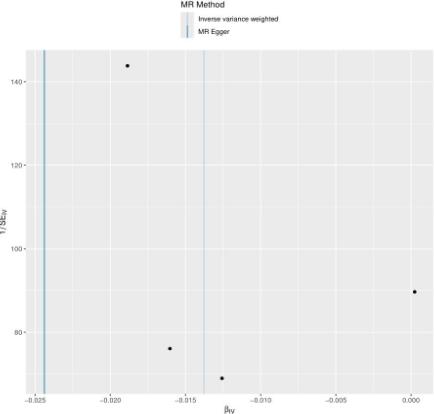
SYT8 HRK


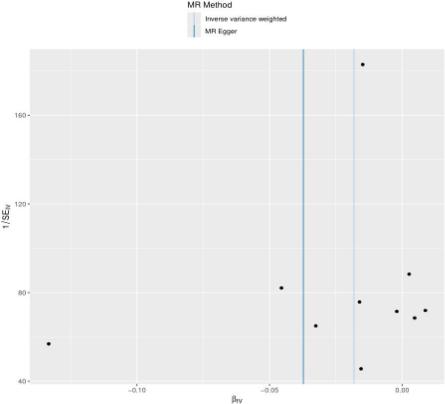


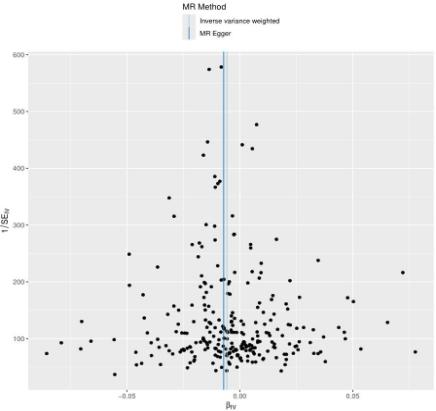

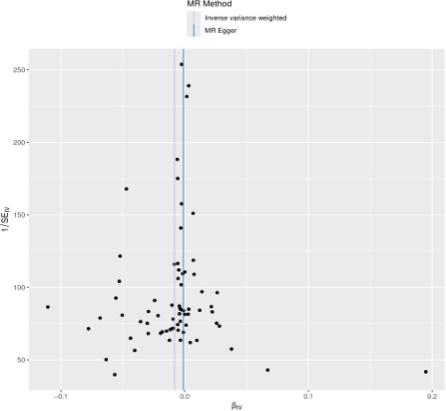
FTMT CD3E


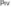

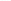


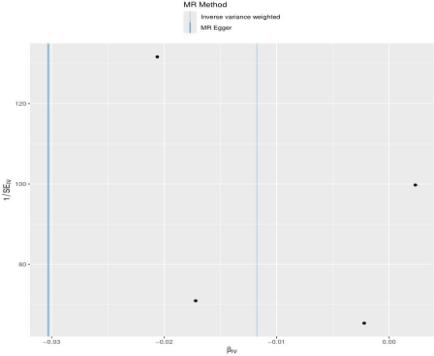
ALK POMGNT1


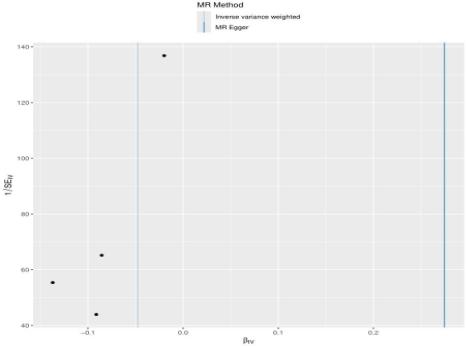


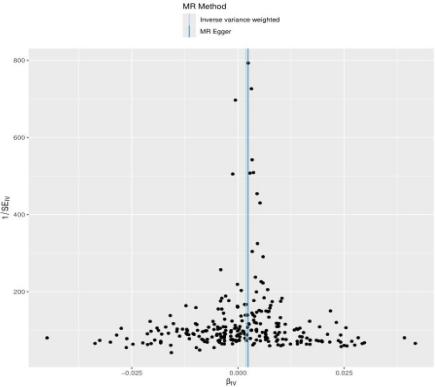

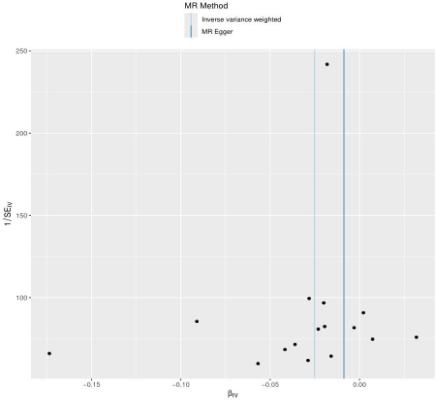

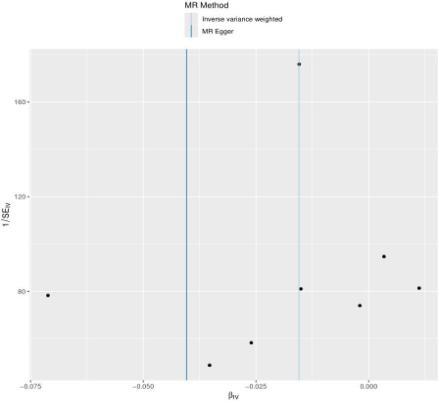
SULF2 QSOX2

PLVAP TRAPPC5


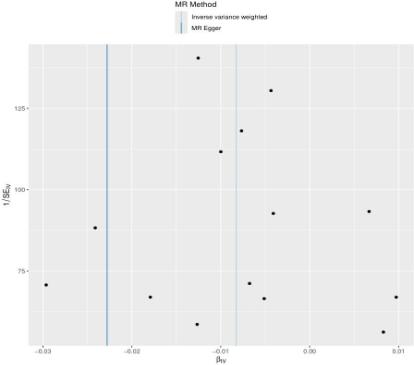


GPC1 CRIM1


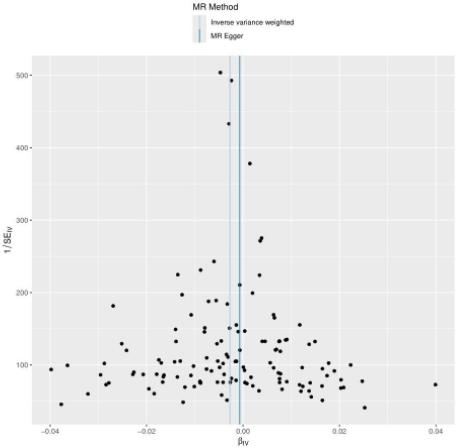

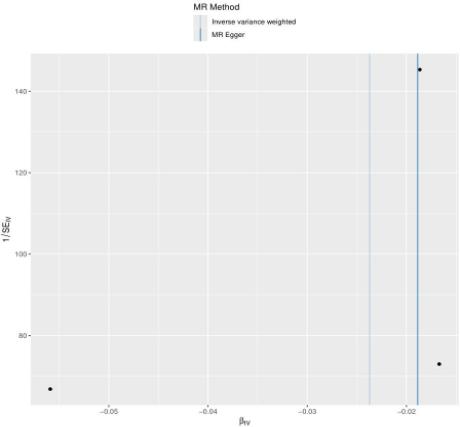

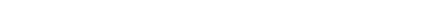

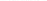

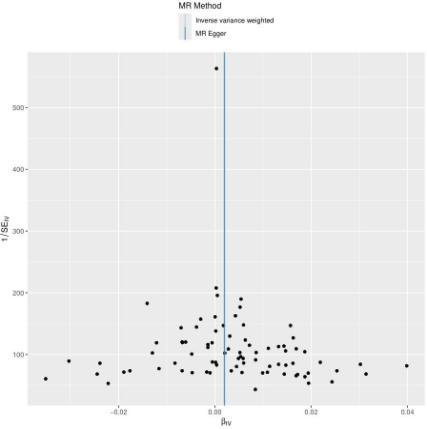

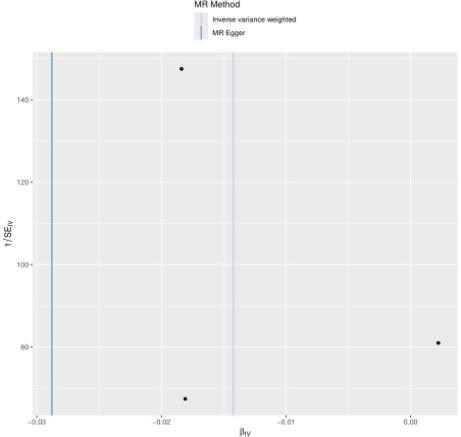
DEEP1 PLA2G2C


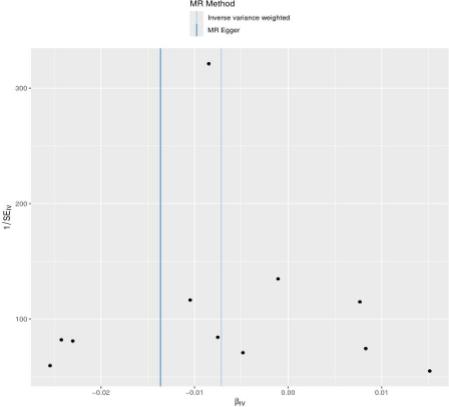

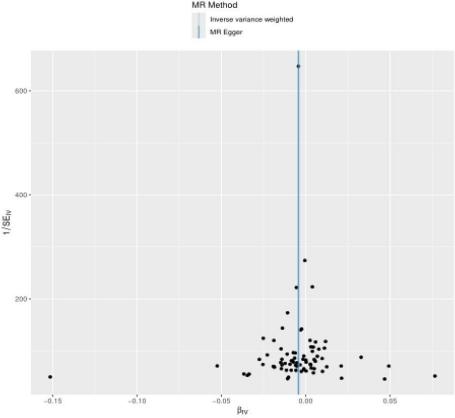
BATF3 GLT8D1


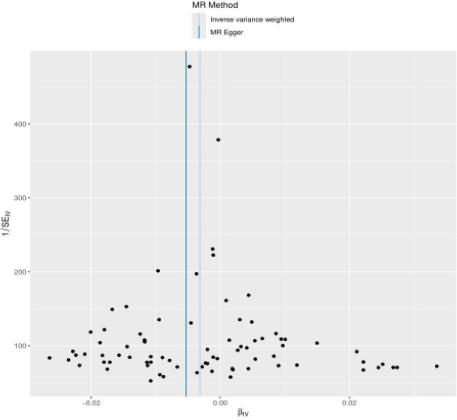

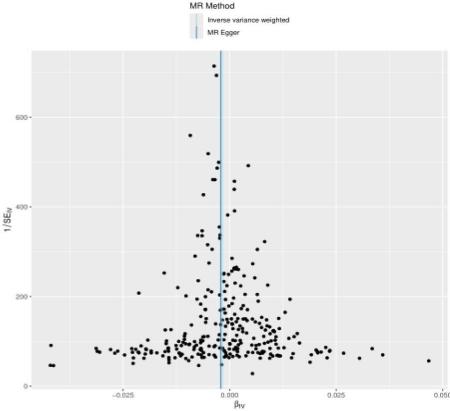
LCT HAVCR1


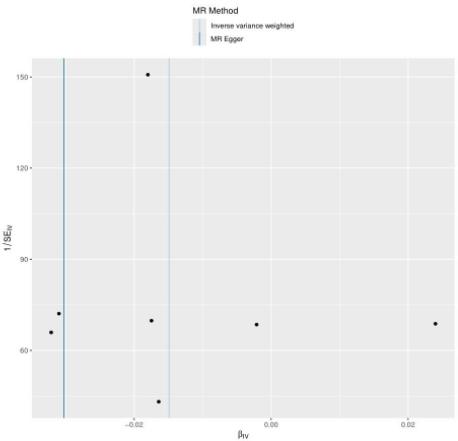


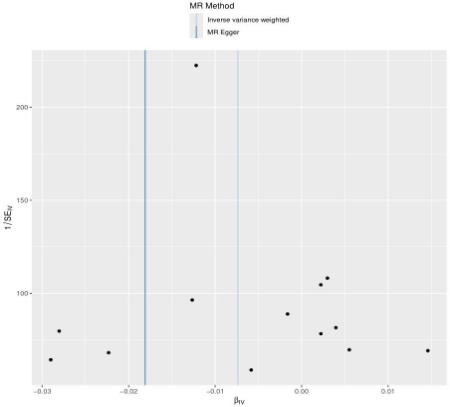
CNTNAP5 UMODL1

MASP1 CCL26


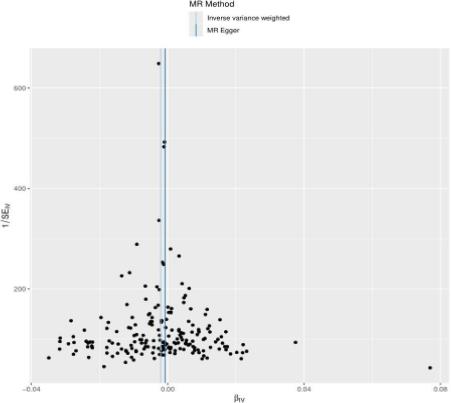
IFNAR1 UBE2G2

PLXDC1 ERP27

TTC9B ACVR2B

LMAN2 MNX1

SYT2 ESRRA

ADAM15 HOGA1

NCF2 AGA

TMEM190 PSMB6

LYSMD3 SUDS3

IL20RB CHRD

REPIN1 ANXA10

AK5 NAB1

GABBR2 CGA

NCF4 TRAPPC3

AKT2 MAD2L1

IFNA4 GLIPR2

EPHB4 FLT4

LGR5 BTLA

TLR1 RNASET2

SULT1E1 ZADH2

SYNJ2BP DCUN1D1

CD46 TPP1

BTN3A3 GMNN

APTX TP5313

SERF2 STXBP6

COMT AES

TBPL1

**Supplementary Figure S2:** Funnel plots to visualize overall heterogeneity of MR estimates for the 141 genes on Sepsis LCN2 IL18RAP

SIGLEC9 FGF2

IL13 AURKA

CD33 TMPRSS15

KREMEN2 CA6

CD207 PLK1

PTPN2 CXCL8

B2M SERPINA1

MMEL1 TEK

HSPA1A CCL24

CFB GZMB

XCL1 IGF1R

PSMA2 FCRL3

CCL19 ATP5B

HPGD UCHL1

SPTAN1 JAG1

MICB TGFBR2

UNC5C GCKR

STK17B GPC6

IL17RC SNRPF

ZPLD1 CTRB2

SEMA3B GZMM

IFNL3 IFNA6

CSAG1 ACP6

LEPRE1 MANBA

VWA1 CCDC126

APOC3 PLBD2

SAYSD1 NDNF

LRP11 CNTNAP2

MRPL52 S100A13

HLA IGFBPL1

C1D SMR3A

SPTLC1 ST8SIA2

SYT8 HRK

FTMT CD3E

ALK POMGNT1

SULF2 QSOX2

PLVAP TRAPPC5

GPC1 CRIM1

DEEP1 PLA2G2C

BATF3 GLT8D1

LCT HAVCR1

CNTNAP5 UMODL1

MASP1 CCL26

IFNAR1 UBE2G2

PLXDC1 ERP27

TTC9B ACVR2B

LMAN2 MNX1

SYT2 ESRRA

ADAM15 HOGA1

NCF2 AGA

TMEM190 PSMB6

LYSMD3 SUDS3

IL20RB CHRD

REPIN1 ANXA10

AK5 NAB1

GABBR2 CGA

NCF4 TRAPPC3

AKT2 MAD2L1

IFNA4 GLIPR2

EPHB4 FLT4

LGR5 BTLA

TLR1 RNASET2

SULT1E1 ZADH2

SYNJ2BP DCUN1D1

CD46 TPP1

BTN3A3 GMNN

APTX TP5313

SERF2 STXBP6

COMT AES

TBPL1

**Supplementary Figure S3:** Leave-one-out plot to visualize causal effect of 141 genes on Asthma risk when leaving one SNP out LCN2 IL18RAP

SIGLEC9 FGF2

IL13 AURKA

CD33 TMPRSS15

KREMEN2 CA6

CD207 PLK1

PTPN2 CXCL8

B2M SERPINA1

MMEL1 TEK

HSPA1A CCL24

CFB GZMB

XCL1 IGF1R

PSMA2 FCRL3

CCL19 ATP5B

HPGD UCHL1

SPTAN1 JAG1

MICB TGFBR2

UNC5C GCKR

STK17B GPC6

IL17RC SNRPF

ZPLD1 CTRB2

SEMA3B GZMM

IFNL3 IFNA6

CSAG1 ACP6

LEPRE1 MANBA

VWA1 CCDC126

APOC3 PLBD2

SAYSD1 NDNF

LRP11 CNTNAP2

MRPL52 S100A13

HLA IGFBPL1

C1D SMR3A

SPTLC1 ST8SIA2

SYT8 HRK

FTMT CD3E

ALK POMGNT1

SULF2 QSOX2

PLVAP TRAPPC5

GPC1 CRIM1

DPEP1 PLA2G2C

BATF3 GLT8D1

LCT HAVCR1

CNTNAP5 UMODL1

MASP1 CCL26

IFNAR1 UBE2G2

PLXDC1 ERP27

TTC9B ACVR2B

LMAN2 MNX1

SYT2 ESRRA

ADAM15 HOGA1

NCF2 AGA

TMEM190 PSMB6

LYSMD3 SUDS3

IL20RB CHRD

REPIN1 ANXA10

AK5 NAB1

GABBR2 CGA

NCF4 TRAPPC3

AKT2 MAD2L1

IFNA4 GLIPR2

EPHB4 FLT4

LGR5 BTLA

TLR1 RNASET2

SULT1E1 ZADH2

SYNJ2BP DCUN1D1

CD46 TPP1

BTN3A3 GMNN

APTX TP53I3

SERF2 STXBP6

COMT AES

TBPL1

**Supplementary Figure S4:** Leave-one-out plot to visualize causal effect of 141 genes on Sepsis risk when leaving one SNP out LCN2 IL18RAP

SIGLEC9 FGF2

IL13 AURKA

CD33 TMPRSS15

KREMEN2 CA6

CD207 PLK1

PTPN2 CXCL8

B2M SERPINA1

MMEL1 TEK

HSPA1A CCL24

CFB GZMB

XCL1 IGF1R

PSMA2 FCRL3

CCL19 ATP5B

HPGD UCHL1

SPTAN1 JAG1

MICB TGFBR2

UNC5C GCKR

STK17B GPC6

IL17RC SNRPF

ZPLD1 CTRB2

SEMA3B GZMM

IFNL3 IFNA6

CSAG1 ACP6

LEPRE1 MANBA

VWA1 CCDC126

APOC3 PLBD2

SAYSD1 NDNF

LRP11 CNTNAP2

MRPL52 S100A13

HLA IGFBPL1

C1D SMR3A

SPTLC1 ST8SIA2

SYT8 HRK

FTMT CD3E

ALK POMGNT1

SULF2 QSOX2

PLVAP TRAPPC5

GPC1 CRIM1

DPEP1 PLA2G2C

BATF3 GLT8D1

LCT HAVCR1

CNTNAP5 UMODL1

MASP1 CCL26

IFNAR1 UBE2G2

PLXDC1 ERP27

TTC9B ACVR2B

LMAN2 MNX1

SYT2 ESRRA

ADAM15 HOGA1

NCF2 AGA

TMEM190 PSMB6

LYSMD3 SUDS3

IL20RB CHRD

REPIN1 ANXA10

AK5 NAB1

GABBR2 CGA

NCF4 TRAPPC3

AKT2 MAD2L1

IFNA4 GLIPR2

EPHB4 FLT4

LGR5 BTLA

TLR1 RNASET2

SULT1E1 ZADH2

SYNJ2BP DCUN1D1

CD46 TPP1

BTN3A3 GMNN

APTX TP53I3

SERF2 STXBP6

COMT AES

TBPL1

**Supplementary Table S1 related to asthma:** 435 important proteins determined by genes significantly associated with asthma identified through MR analysis of pQTLs in the Icelandic population(P＜5×10-8)

| GENE | PRO | nSNP | BETA | SE | P | OR |
| --- | --- | --- | --- | --- | --- | --- |
| HOGA1 | HOGA1 | 7 | -0.01187 | 0.003888 | 0.002259 | 0.98819632 |
| NCF2 | NCF | 63 | 0.002572 | 0.00088 | 0.003469 | 1.00257566 |
| AGA | ASPG | 9 | -0.00699 | 0.003291 | 0.033661 | 0.99303492 |
| CSF2RA | CSF2R | 5 | -0.04205 | 0.014637 | 0.004064 | 0.95881761 |
| CLMP | ACAM | 17 | -0.00604 | 0.002187 | 0.005763 | 0.99397862 |
| TMEM190 | TM190 | 244 | -0.00088 | 0.000389 | 0.024604 | 0.99912512 |
| IL31 | IL | 46 | 0.003855 | 0.001273 | 0.00246 | 1.00386276 |
| ANTXR1 | ANTR1 | 11 | -0.00576 | 0.002918 | 0.048477 | 0.99425855 |
| ACRV1 | sperm | 11 | -0.01274 | 0.00488 | 0.009032 | 0.98733869 |
| CSF2RB | IL3RB | 79 | -0.0021 | 0.0009 | 0.019658 | 0.99790361 |
| PSMB6 | PSB6 | 5 | -0.01309 | 0.004893 | 0.007483 | 0.98699807 |
| LYSMD3 | LYSM3 | 3 | -0.01566 | 0.006311 | 0.013065 | 0.98445845 |
| CASC4 | CASC4 | 73 | 0.00281 | 0.001344 | 0.036552 | 1.00281369 |
| APLP2 | APLP2 | 10 | 0.007297 | 0.00296 | 0.013675 | 1.00732401 |
| HTATIP2 | HTAI2 | 134 | 0.001755 | 0.000704 | 0.012641 | 1.0017561 |
| ASCC1 | ASCC1 | 8 | 0.011376 | 0.004452 | 0.010609 | 1.01144105 |
| IGSF11 | IGS11 | 3 | -0.02201 | 0.007963 | 0.005707 | 0.97823074 |
| SUDS3 | SDS3 | 13 | -0.01223 | 0.005567 | 0.02799 | 0.987842 |
| HS3ST5 | HS3S5 | 37 | 0.00477 | 0.001648 | 0.003793 | 1.00478105 |
| ADAM7 | ADAM7 | 30 | 0.005483 | 0.001525 | 0.000325 | 1.00549759 |
| CLEC4G | CLC4G | 28 | 0.004592 | 0.001617 | 0.004519 | 1.00460284 |
| HABP4 | HABP4 | 51 | -0.00301 | 0.001518 | 0.047704 | 0.99699819 |
| PLA2R1 | PLA2R | 436 | 0.001294 | 0.000395 | 0.001057 | 1.00129514 |
| BGLAP | Osteocalcin | 22 | 0.038526 | 0.013349 | 0.003899 | 1.03927818 |
| PDXK | PDXK | 19 | 0.011342 | 0.002928 | 0.000107 | 1.01140656 |
| CACNB4 | CACB4 | 10 | -0.01042 | 0.004468 | 0.019653 | 0.98963047 |
| PCSK1 | NEC1 | 288 | -0.001 | 0.000473 | 0.035091 | 0.99900396 |
| MAN1C1 | MA1C1 | 45 | 0.006821 | 0.001832 | 0.000197 | 1.00684412 |
| IL20RB | IL | 26 | 0.058524 | 0.010703 | 4.55E-08 | 1.0602706 |
| CHRD | CHRD | 27 | 0.048481 | 0.011302 | 1.79E-05 | 1.04967544 |
| SPRN | SPRN | 27 | 0.004186 | 0.001578 | 0.007989 | 1.0041952 |
| MRPL33 | RM33 | 79 | 0.001686 | 0.000824 | 0.040787 | 1.00168733 |
| NRAC | NRAC | 15 | 0.010212 | 0.0046 | 0.02643 | 1.01026426 |
| TCEA2 | TCEA2 | 4 | 0.009243 | 0.004381 | 0.034884 | 1.00928619 |
| ARFIP1 | ARFP1 | 17 | -0.00582 | 0.002412 | 0.015751 | 0.99419236 |
| ARHGEF25 | ARHGP | 7 | -0.02337 | 0.010382 | 0.024411 | 0.97690561 |
| REPIN1 | REPI1 | 8 | -0.00768 | 0.003487 | 0.027627 | 0.99234992 |
| ABLIM3 | ABLM3 | 4 | -0.01407 | 0.004884 | 0.00397 | 0.9860293 |
| ANXA10 | ANX10 | 9 | -0.02161 | 0.010252 | 0.035018 | 0.97861877 |
| AK5 | Adenylate | 12 | -0.01484 | 0.007348 | 0.0434 | 0.9852684 |
| ATG4B | ATG4B | 3 | 0. 11759 | 0.058276 | 0.043612 | 1. 12478289 |
| TOM1L1 | TM1L1 | 11 | 0.011118 | 0.00464 | 0.016573 | 1.01118036 |
| SLC5A8 | SC5A8 | 72 | 0.003451 | 0.001306 | 0.008252 | 1.0034569 |
| IL3RA | IL | 166 | -0.00275 | 0.000626 | 1. 10E-05 | 0.99725309 |
| NAB1 | NAB1 | 5 | 0.011101 | 0.005266 | 0.035002 | 1.01116333 |
| SULT1A3 | SULT | 27 | 0.006661 | 0.002971 | 0.024966 | 1.00668286 |
| GABBR2 | GABR2 | 11 | -0.01324 | 0.004673 | 0.004617 | 0.98685029 |
| DAPK1 | DAPK1 | 24 | -0.00676 | 0.002413 | 0.005118 | 0.99326708 |
| LANCL1 | LANC1 | 6 | 0.009645 | 0.004154 | 0.020245 | 1.0096912 |
| GNMT | GNMT | 24 | -0.00378 | 0.001703 | 0.026288 | 0.99622244 |
| TNFAIP3 | TNFAIP3 | 7 | -0.01447 | 0.003681 | 8.46E-05 | 0.98563339 |
| MED4 | MED4 | 27 | -0.00662 | 0.001983 | 0.000838 | 0.99339944 |
| COPS2 | CSN2 | 38 | 0.005767 | 0.001726 | 0.000831 | 1.00578386 |
| BDNF | BDNF | 11 | 0.008798 | 0.004382 | 0.044665 | 1.00883716 |
| CGA | Glycoprotein | 12 | -0.05242 | 0.025597 | 0.040567 | 0.94892931 |

| NCF4 | NCF4 | 20 | -0.02802 | 0.012453 | 0.024459 | 0.97237167 |
| --- | --- | --- | --- | --- | --- | --- |
| MTHFS | MTHFS | 94 | 0.001978 | 0.000835 | 0.017876 | 1.0019795 |
| S100A4 | S100A4 | 14 | 0.007178 | 0.002714 | 0.008175 | 1.00720382 |
| C10orf54 | GI24 | 55 | 0.003685 | 0.001426 | 0.009775 | 1.00369141 |
| EFNB2 | EFNB2 | 17 | -0.01026 | 0.004024 | 0.010758 | 0.98978859 |
| AMIGO2 | AMGO2 | 25 | -0.01577 | 0.006059 | 0.009243 | 0.9843524 |
| HIST2H2BE | H2B2E | 9 | 0.007714 | 0.003288 | 0.018976 | 1.00774362 |
| ANXA5 | Annexin | 8 | -0.00859 | 0.003749 | 0.021911 | 0.99144334 |
| ANXA7 | ANXA7 | 5 | -0.01681 | 0.007668 | 0.028401 | 0.98333363 |
| PREP | PPCE | 15 | -0.00757 | 0.00263 | 0.003979 | 0.99245446 |
| RALA | RALA | 17 | -0.0067 | 0.002551 | 0.008634 | 0.99332254 |
| TRAPPC3 | TPPC3 | 48 | -0.01875 | 0.006499 | 0.003921 | 0.98142866 |
| FAM210A | F210A | 5 | 0.018329 | 0.007595 | 0.015811 | 1.01849779 |
| FBXO3 | FBX3 | 14 | -0.00626 | 0.002525 | 0.013147 | 0.99375734 |
| AKT2 | PKB | 45 | 0.006868 | 0.001524 | 6.59E-06 | 1.00689127 |
| IGF2 | IGF | 28 | 0.00615 | 0.002522 | 0.014769 | 1.00616874 |
| VWC2 | VWC2 | 74 | 0.004449 | 0.001026 | 1.45E-05 | 1.00445849 |
| MAD2L1 | MD2L1 | 12 | -0.01259 | 0.005418 | 0.02014 | 0.98749003 |
| CRADD | CRADD | 3 | 0.018814 | 0.008264 | 0.022804 | 1.01899232 |
| APOC1 | Apo | 49 | -0.00599 | 0.002329 | 0.010157 | 0.99403236 |
| BPIFB1 | LPLC1 | 181 | -0.00163 | 0.000689 | 0.018119 | 0.99837281 |
| CPB1 a | rboxypeptida | 56 | -0.00782 | 0.002028 | 0.000114 | 0.99220579 |
| KL | KLOTHO | 95 | -0.0037 | 0.001297 | 0.004304 | 0.9963047 |
| GSTM1 | GST | 286 | 0.001107 | 0.000498 | 0.026135 | 1.00110789 |
| IFNA4 | IFNA4 | 4 | -0.01251 | 0.006091 | 0.040057 | 0.98757275 |
| LOXL3 | LOXL3 | 121 | -0.00173 | 0.000804 | 0.031682 | 0.9982734 |
| GM2A | SAP3 | 32 | 0.004751 | 0.001331 | 0.000359 | 1.00476214 |
| CD8A | CD8A | 125 | -0.00682 | 0.002184 | 0.00179 | 0.99320157 |
| LRP11 | LRP11 | 178 | 0.002371 | 0.00069 | 0.000589 | 1.00237358 |
| FGFBP1 | FGFP1 | 15 | -0.03452 | 0.013283 | 0.009357 | 0.96607016 |
| PRSS8 | Prostasin | 9 | 0.012965 | 0.005189 | 0.012469 | 1.01304978 |
| GLIPR2 | GAPR1 | 45 | 0.003247 | 0.001641 | 0.047823 | 1.00325179 |
| ADH1C | ADH1G | 11 | -0.00803 | 0.002645 | 0.002386 | 0.99199774 |
| EPHB4 | EphB4 | 42 | -0.0044 | 0.001452 | 0.002463 | 0.9956117 |
| PRSS27 | Marapsin | 117 | -0.00169 | 0.000846 | 0.046467 | 0.998316 |
| TCN2 | Apo | 570 | 0.000766 | 0.00029 | 0.008195 | 1.00076589 |
| CR2 | Complement | 94 | -0.00771 | 0.003236 | 0.017189 | 0.99231925 |
| IL6R | IL | 354 | 0.00166 | 0.000502 | 0.000947 | 1.00166105 |
| KRT19 | Keratin | 38 | 0.004216 | 0.002118 | 0.046512 | 1.00422498 |
| PKLR | KPYR | 10 | -0.00839 | 0.003682 | 0.022643 | 0.99164136 |
| PNLIP | LIPP | 64 | -0.00483 | 0.002125 | 0.022939 | 0.99517939 |
| FLT4 | VEGF | 181 | -0.00226 | 0.00069 | 0.001031 | 0.99773919 |
| TEC | TEC | 13 | 0.006883 | 0.002972 | 0.020558 | 1.00690626 |
| EPHA4 | EPHA4 | 99 | -0.00349 | 0.000802 | 1.33E-05 | 0.99651258 |
| GHRH | Growth | 4 | 0.012073 | 0.005885 | 0.040223 | 1.01214599 |
| LGR5 | LGR5 | 8 | -0.01687 | 0.008118 | 0.037714 | 0.98327241 |
| BTLA | BTLA | 6 | -0.01071 | 0.003929 | 0.006387 | 0.98934295 |
| TLR1 | TLR1 | 32 | -0.01859 | 0.008172 | 0.022911 | 0.98158082 |
| GSN | Gelsolin | 46 | 0.002665 | 0.001347 | 0.047855 | 1.00266839 |
| LY75 | LY75 | 592 | -0.00088 | 0.000334 | 0.008655 | 0.99912296 |
| CASK | CSKP | 10 | -0.02224 | 0.009052 | 0.013999 | 0.97800237 |
| IL26 | IL | 390 | -0.00181 | 0.000438 | 3.47E-05 | 0.99818714 |
| REG1B | REG1B | 127 | 0.002106 | 0.000821 | 0.010324 | 1.00210836 |
| ENGASE | ENASE | 108 | -0.00219 | 0.00075 | 0.00357 | 0.99781633 |
| RNASET2 | RNT2 | 73 | 0.003476 | 0.001346 | 0.009791 | 1.00348245 |
| SLITRK6 | SLIK6 | 25 | -0.00446 | 0.002236 | 0.046177 | 0.99555124 |
| SULT1E1 | SULT | 3 | -0.01402 | 0.005154 | 0.006512 | 0.98607448 |
| PDGFD | PDGFD | 91 | -0.00471 | 0.000977 | 1.46E-06 | 0.99530541 |

| STATH | STAT | 21 | 0.05531 | 0.015103 | 0.00025 | 1.05686792 |
| --- | --- | --- | --- | --- | --- | --- |
| BDH2 | BDH2 | 16 | -0.00666 | 0.002036 | 0.001075 | 0.99336351 |
| ADPRHL2 | ARHL2 | 17 | -0.00462 | 0.002327 | 0.047177 | 0.99539223 |
| ZADH2 | ZADH2 | 4 | -0.01185 | 0.005364 | 0.027215 | 0.98822428 |
| SYNJ2BP | SYJ2B | 4 | -0.01316 | 0.005093 | 0.009743 | 0.98692158 |
| CHMP2B | CHM2B | 36 | 0.004609 | 0.001848 | 0.012643 | 1.00461972 |
| DCUN1D1 | DCNL1 | 45 | -0.01085 | 0.003285 | 0.000963 | 0.9892133 |
| STARD5 | STAR5 | 28 | -0.00352 | 0.001502 | 0.019115 | 0.99648635 |
| HMOX1 | HO | 43 | -0.00559 | 0.001884 | 0.002996 | 0.99442399 |
| CD160 | BY55 | 11 | -0.01415 | 0.003307 | 1.89E-05 | 0.9859512 |
| EPHB1 | EPHB1 | 43 | 0.003942 | 0.001263 | 0.001807 | 1.00394933 |
| CD46 | CD46 | 26 | -0.00696 | 0.001732 | 5.82E-05 | 0.99305979 |
| TPP1 | TPP1 | 36 | 0.003953 | 0.001626 | 0.01507 | 1.0039609 |
| BTN3A3 | BT3A3 | 362 | -0.00561 | 0.000753 | 8.83E- 14 | 0.99440336 |
| GMNN | GEMI | 9 | -0.02417 | 0.011314 | 0.03263 | 0.97611657 |
| VAMP1 | VAMP1 | 4 | 0. 13883 | 0.059195 | 0.019011 | 1. 14892851 |
| APTX | APTX | 13 | -0.01385 | 0.002934 | 2.36E-06 | 0.98624626 |
| TP53I3 | QORX | 83 | -0.00228 | 0.001156 | 0.04875 | 0.99772496 |
| NANS | SIAS | 8 | -0.00868 | 0.003924 | 0.026973 | 0.99135725 |
| S100A14 | S100A14 | 5 | -0.01596 | 0.005897 | 0.006816 | 0.9841711 |
| IL11RA | IL | 57 | -0.00356 | 0.001192 | 0.002795 | 0.99644445 |
| SH3GLB2 | SHLB2 | 35 | -0.00592 | 0.001771 | 0.000826 | 0.99409435 |
| ANXA7 | ANXA7 | 5 | -0.01677 | 0.007458 | 0.024506 | 0.98336501 |
| SERF2 | SERF2 | 5 | -0.00898 | 0.004507 | 0.046239 | 0.99105601 |
| TRIAP1 | TRIA1 | 7 | -0.01104 | 0.004167 | 0.008071 | 0.98902228 |
| STXBP6 | STXB6 | 37 | 0.008452 | 0.001469 | 8.79E-09 | 1.00848822 |
| SEPW1 | SELW | 38 | 0.002576 | 0.001314 | 0.049894 | 1.00257918 |
| JMJD6 | JMJD6 | 4 | 0.01029 | 0.005088 | 0.043154 | 1.0103429 |
| COMT | Catechol | 22 | -0.00433 | 0.001769 | 0.014374 | 0.99567839 |
| AES | AES | 14 | -0.02127 | 0.009603 | 0.026762 | 0.97895444 |
| RALB | RALB | 16 | -0.00629 | 0.002226 | 0.004687 | 0.99372599 |
| TBPL1 | TBPL1 | 26 | 0.008759 | 0.003115 | 0.004927 | 1.00879726 |
| HIST3H2BB | H2B3B | 8 | 0.008015 | 0.003376 | 0.017587 | 1.00804704 |
| PRSS3 | TRY3 | 140 | 0.002056 | 0.000922 | 0.025795 | 1.00205838 |
| CNN2 | CNN2 | 5 | 0.012707 | 0.00407 | 0.001796 | 1.01278828 |
| GBP2 | GBP2 | 24 | -0.01842 | 0.008409 | 0.028452 | 0.98174457 |
| HDGFRP3 | HDGR3 | 141 | -0.00352 | 0.000917 | 0.000122 | 0.99648427 |
| KRT16 | Keratin | 19 | 0.003809 | 0.001447 | 0.008498 | 1.00381614 |
| EXOSC8 | EXOS8 | 5 | -0.01313 | 0.006225 | 0.03498 | 0.98695935 |
| CDC2 | p34 | 7 | -0.00534 | 0.002704 | 0.048407 | 0.99467759 |
| SLIT2 | SLIT2 | 23 | -0.00614 | 0.002785 | 0.027526 | 0.99388158 |
| SLIT3 | SLIT3 | 24 | -0.00517 | 0.002213 | 0.019487 | 0.99484275 |
| HSPB6 | HSPB6 | 10 | 0.032517 | 0.010142 | 0.001346 | 1.03305174 |
| ADK | ADK | 9 | 0.010428 | 0.004056 | 0.010146 | 1.01048237 |
| BAG2 | BAG | 4 | 0.030721 | 0.00587 | 1.66E-07 | 1.0311977 |
| GMPR | GMPR1 | 465 | -0.0009 | 0.00034 | 0.007817 | 0.99909718 |
| MMP3 | MMP | 22 | 0.006799 | 0.002189 | 0.001895 | 1.00682253 |
| ANGPT1 | Angiopoietin | 6 | 0.01393 | 0.006626 | 0.035531 | 1.01402765 |
| CDH5 | Cadherin | 116 | -0.00272 | 0.00071 | 0.000129 | 0.99728531 |
| LCN2 | Lipocalin | 25 | 0.015107 | 0.006447 | 0.019124 | 1.01522125 |
| MET | Met | 51 | -0.00998 | 0.001966 | 3.84E-07 | 0.99006956 |
| MAPK3 | ERK | 21 | -0.01018 | 0.002161 | 2.48E-06 | 0.98987302 |
| C7 | C7 | 191 | 0.001201 | 0.000588 | 0.041189 | 1.00120218 |
| GHR | Growth | 20 | 0.006249 | 0.002667 | 0.01911 | 1.00626829 |
| IGFBP4 | IGFBP | 3 | 0.029247 | 0.007757 | 0.000163 | 1.02967869 |
| IL1R1 | IL | 80 | 0.005861 | 0.002548 | 0.021434 | 1.0058786 |
| IL18RAP | IL | 7 | -0.00853 | 0.00391 | 0.029242 | 0.99151087 |
| NCR3 | NKp30 | 45 | 0.023369 | 0.007094 | 0.000987 | 1.02364386 |

| SIGLEC9 | Siglec | 223 | -0.00104 | 0.000423 | 0.013604 | 0.99895559 |
| --- | --- | --- | --- | --- | --- | --- |
| FGF2 | FGF  b | 154 | 0.003841 | 0.000981 | 9.04E-05 | 1.0038487 |
| CD209 | DC | 229 | 0.001243 | 0.000456 | 0.006452 | 1.00124422 |
| RETN | resistin | 83 | 0.003957 | 0.001733 | 0.02243 | 1.00396443 |
| PRSS1 | Trypsin | 29 | -0.0079 | 0.003101 | 0.010881 | 0.99213509 |
| IL13 | IL | 11 | -0.01382 | 0.006191 | 0.025616 | 0.98627596 |
| IL18BP | IL | 12 | -0.01479 | 0.003902 | 0.00015 | 0.98531498 |
| AURKA | Aurora | 15 | -0.00946 | 0.00472 | 0.045121 | 0.99058818 |
| DIABLO | SMAC | 6 | 0.013035 | 0.004259 | 0.002209 | 1.01312012 |
| CD33 | Siglec | 246 | 0.001397 | 0.000481 | 0.003695 | 1.00139797 |
| ADAMTS5 | ADAMTS | 28 | -0.00252 | 0.001151 | 0.028554 | 0.99748252 |
| C2 | C2 | 233 | 0.004774 | 0.001195 | 6.51E-05 | 1.00478511 |
| TMPRSS15 | Enterokinase | 8 | -0.01872 | 0.008706 | 0.03152 | 0.98145172 |
| KREMEN2 | KREM2 | 3 | -0.01471 | 0.005625 | 0.008925 | 0.98539871 |
| ACP5 | TrATPase | 33 | 0.003428 | 0.001746 | 0.049571 | 1.00343343 |
| GFRA1 | GFRa | 26 | -0.02454 | 0.008922 | 0.005958 | 0.97576308 |
| SERPIND1 | Heparin | 42 | -0.00406 | 0.001577 | 0.010059 | 0.99594906 |
| PGLYRP1 | PGRP | 48 | -0.02298 | 0.008103 | 0.004562 | 0.97727897 |
| RGMB | RGMB | 18 | 0.008049 | 0.002811 | 0.004191 | 1.00808192 |
| CA6 | Carbonic | 178 | 0.002943 | 0.000738 | 6.61E-05 | 1.00294743 |
| CD207 | CLC4K | 6 | -0.01313 | 0.004487 | 0.003426 | 0.98695484 |
| SERPINA5 | PCI | 25 | 0.005695 | 0.002083 | 0.006246 | 1.00571112 |
| PLK1 | PLK | 3 | -0.01941 | 0.00671 | 0.003826 | 0.98078136 |
| PTPN2 | TCPTP | 12 | -0.02156 | 0.009534 | 0.02376 | 0.97867536 |
| BCL2A1 | BFL1 | 9 | 0.007802 | 0.00397 | 0.049383 | 1.00783242 |
| EPHA1 | EphA1 | 171 | 0.00114 | 0.000533 | 0.03246 | 1.00114059 |
| CXCL8 | IL | 6 | -0.02782 | 0.013173 | 0.034723 | 0.97256711 |
| INSR | IR | 121 | -0.00426 | 0.001018 | 2.89E-05 | 0.99575075 |
| SELE | sE | 170 | -0.0023 | 0.000583 | 7.71E-05 | 0.99769908 |
| B2M | 2  b | 52 | 0.017121 | 0.005513 | 0.001899 | 1.01726801 |
| CPB2 | TAFI | 87 | -0.00235 | 0.000913 | 0.010128 | 0.99765462 |
| SERPINA1 | a1 | 129 | -0.00202 | 0.000623 | 0.001156 | 0.99797851 |
| CAMK1 | CAMK1 | 271 | -0.00125 | 0.000537 | 0.019407 | 0.99874596 |
| HGFAC | HGFA | 266 | 0.001168 | 0.000404 | 0.003835 | 1.00116906 |
| MMEL1 | MMEL2 | 3 | -0.01581 | 0.00662 | 0.016963 | 0.98431906 |
| LRPAP1 | RAP | 247 | -0.00276 | 0.001066 | 0.009485 | 0.99723907 |
| KDR | VEGF | 85 | -0.00437 | 0.001298 | 0.000767 | 0.99564239 |
| TEK | sTie | 67 | -0.00484 | 0.001894 | 0.010616 | 0.99517141 |
| NAGK | NAGK | 28 | 0.004853 | 0.001866 | 0.009287 | 1.00486473 |
| HSPA1A | HSP | 22 | -0.04581 | 0.014397 | 0.001464 | 0.95522461 |
| AGER | sRAGE | 174 | -0.01267 | 0.001821 | 3.41E- 12 | 0.98740982 |
| CCL24 | Eotaxin | 15 | -0.01611 | 0.007848 | 0.040067 | 0.98401657 |
| CFB | Factor | 136 | 0.006897 | 0.00234 | 0.0032 | 1.00692105 |
| FN1 | Fibronectin | 10 | -0.00625 | 0.002998 | 0.037175 | 0.99377141 |
| GZMB | Granzyme | 27 | -0.02875 | 0.008858 | 0.00117 | 0.97165495 |
| XCL1 | Lymphotactin | 5 | -0.01106 | 0.004516 | 0.01436 | 0.98900496 |
| F2 | Thrombin | 93 | 0.002039 | 0.000848 | 0.016138 | 1.00204131 |
| PLAU | uPA | 87 | -0.00456 | 0.001053 | 1.46E-05 | 0.99544825 |
| AKR1A1 | AK1A1 | 158 | 0.002051 | 0.000777 | 0.008292 | 1.00205348 |
| CFL1 | Cofilin | 5 | -0.01596 | 0.007016 | 0.022959 | 0.98417079 |
| IGF1R | IGF | 34 | -0.00693 | 0.001779 | 9.76E-05 | 0.99309325 |
| PSMA2 | PSA2 | 21 | -0.01847 | 0.009246 | 0.04571 | 0.98169555 |
| BOC | BOC | 38 | -0.00426 | 0.001949 | 0.02901 | 0.9957539 |
| ICAM1 | sICAM | 349 | -0.0012 | 0.000352 | 0.000692 | 0.99880497 |
| DAPK2 | DAPK2 | 26 | -0.00691 | 0.002097 | 0.000987 | 0.99311398 |
| GDF15 | MIC | 92 | -0.00214 | 0.000925 | 0.020874 | 0.99786554 |
| COLEC11 | Collectin | 187 | 0.001378 | 0.000619 | 0.025915 | 1.00137869 |
| FCRL3 | FCRL3 | 148 | -0.00247 | 0.000854 | 0.003886 | 0.99753599 |

| TGM3 | TGM3 | 86 | -0.01201 | 0.00317 | 0.000152 | 0.98806199 |
| --- | --- | --- | --- | --- | --- | --- |
| FUT5 | FUT5 | 166 | 0.001911 | 0.000671 | 0.004381 | 1.00191287 |
| KYNU | KYNU | 69 | 0.003303 | 0.001304 | 0.011268 | 1.00330888 |
| SORCS2 | SORC2 | 13 | 0.056306 | 0.021373 | 0.008426 | 1.05792136 |
| SMPDL3A | ASM3A | 30 | 0.00347 | 0.001512 | 0.021756 | 1.00347597 |
| EPHA2 | Epithelial | 52 | -0.00515 | 0.0016 | 0.001297 | 0.99486752 |
| CSF3 | G | 96 | -0.0042 | 0.001091 | 0.000119 | 0.99580815 |
| COTL1 | Coactosin | 10 | 0.010602 | 0.003804 | 0.005321 | 1.01065817 |
| ENG | Endoglin | 129 | -0.00356 | 0.000813 | 1.20E-05 | 0.99644913 |
| LGALS8 | Galectin | 5 | -0.01464 | 0.003207 | 5.02E-06 | 0.98547088 |
| CCL19 | MIP | 42 | -0.02022 | 0.006818 | 0.00302 | 0.97998291 |
| ATP5B | ATP | 28 | -0.01609 | 0.008026 | 0.045036 | 0.98404268 |
| DPT | DERM | 86 | -0.00241 | 0.001033 | 0.019699 | 0.99759295 |
| HPGD | HPG | 10 | 0.005445 | 0.002407 | 0.023708 | 1.00545965 |
| UCHL1 | PGP9 | 30 | 0.003949 | 0.001579 | 0.012406 | 1.00395646 |
| SPTAN1 | SPTA2 | 3 | -0.01363 | 0.006941 | 0.049557 | 0.98646131 |
| CD55 | DAF | 51 | -0.00383 | 0.001139 | 0.00078 | 0.99617919 |
| JAG1 | JAG1 | 16 | -0.00901 | 0.00332 | 0.006641 | 0.9910277 |
| MICB | MICB | 322 | -0.00836 | 0.000695 | 2.67E-33 | 0.99167347 |
| NOTCH3 | Notch | 18 | -0.01402 | 0.005547 | 0.011514 | 0.98608097 |
| CD200 | OX2G | 9 | -0.01166 | 0.005031 | 0.020497 | 0.98840951 |
| SCARF1 | SREC | 52 | -0.00268 | 0.001227 | 0.028856 | 0.99732126 |
| TGFBR2 | TGF | 6 | -0.00982 | 0.003609 | 0.006504 | 0.99022747 |
| UNC5C | UNC5H3 | 27 | -0.00427 | 0.001692 | 0.011639 | 0.99573926 |
| GCKR | GCKR | 13 | -0.01143 | 0.005716 | 0.045534 | 0.98863584 |
| PDK1 | PDK1 | 15 | -0.0055 | 0.002712 | 0.04249 | 0.99451429 |
| STK17B | DRAK2 | 8 | -0.02701 | 0.013588 | 0.046815 | 0.97334917 |
| PDE11A | PDE11 | 3 | -0.02129 | 0.010463 | 0.041854 | 0.97893333 |
| GPC6 | GPC6 | 20 | 0.003395 | 0.001525 | 0.026056 | 1.0034005 |
| IL1RN | IL | 22 | -0.00656 | 0.002626 | 0.0125 | 0.99346231 |
| ASGR1 | ASGR1 | 6 | 0.011016 | 0.005328 | 0.038678 | 1.01107679 |
| IL17RC | IL | 3 | -0.02778 | 0.013785 | 0.043869 | 0.97260144 |
| CCL5 | RANTES | 20 | 0.006083 | 0.002146 | 0.004583 | 1.00610183 |
| RASA1 | RASA1 | 9 | 0.008574 | 0.00349 | 0.014037 | 1.00861054 |
| ICAM2 | sICAM | 12 | -0.01048 | 0.004697 | 0.025604 | 0.98956997 |
| SNRPF | RUXF | 25 | 0.006504 | 0.002006 | 0.001185 | 1.00652474 |
| NRP1 | NRP1 | 66 | 0.002861 | 0.001336 | 0.03228 | 1.00286508 |
| FGL1 | FGL1 | 182 | 0.001433 | 0.000643 | 0.025843 | 1.00143373 |
| TCN2 | Holo | 266 | 0.001055 | 0.000503 | 0.035786 | 1.00105569 |
| ZPLD1 | ZPLD1 | 6 | -0.0404 | 0.020433 | 0.048035 | 0.9604073 |
| PDIA5 | PDIA5 | 118 | -0.00213 | 0.000694 | 0.002203 | 0.99787689 |
| NPFF | NPFF | 112 | 0.002051 | 0.001009 | 0.042059 | 1.00205353 |
| THSD1 | THSD1 | 135 | -0.0027 | 0.000684 | 7.85E-05 | 0.99730202 |
| CTRB2 | CTRB2 | 341 | -0.00101 | 0.00039 | 0.009771 | 0.99899325 |
| ENDOU | PP11 | 3 | -0.02378 | 0.009113 | 0.009074 | 0.97650279 |
| F13B | coagulation | 60 | -0.00338 | 0.001189 | 0.004438 | 0.99662207 |
| SEMA3B | SEM3B | 8 | -0.02574 | 0.011441 | 0.024488 | 0.97459259 |
| ASIP | ASIP | 84 | -0.00233 | 0.000953 | 0.014517 | 0.99767396 |
| CBLN4 | CBLN4 | 43 | -0.00387 | 0.001691 | 0.022289 | 0.99614208 |
| CRISPLD2 | CRLD2 | 89 | 0.004477 | 0.002181 | 0.04011 | 1.00448684 |
| GZMM | Granzyme | 5 | -0.01855 | 0.008807 | 0.035166 | 0.98161882 |
| IFNL3 | IFN | 12 | 0.068549 | 0.023888 | 0.00411 | 1.0709529 |
| IFNA6 | IFNA6 | 6 | -0.02664 | 0.011552 | 0.021102 | 0.97371151 |
| CSAG1 | CSAG1 | 38 | 0.006498 | 0.001607 | 5.26E-05 | 1.00651912 |
| ACP6 | PPA6 | 370 | -0.00115 | 0.000492 | 0.019932 | 0.99885527 |
| MENT | CA056 | 98 | -0.00438 | 0.001318 | 0.000883 | 0.99562648 |
| SPAG11B | Sperm | 25 | -0.04296 | 0.011178 | 0.000121 | 0.95794945 |
| IFNGR1 | IFN | 7 | -0.00955 | 0.003765 | 0.011199 | 0.99049523 |

| LIFR | LIF | 59 | -0.0052 | 0.001345 | 0.000111 | 0.99481399 |
| --- | --- | --- | --- | --- | --- | --- |
| TNFSF12 | TWEAK | 32 | -0.01118 | 0.001852 | 1.58E-09 | 0.98888524 |
| PTH | PTH | 16 | 0.007853 | 0.003829 | 0.04027 | 1.00788411 |
| SUMF2 | SUMF2 | 14 | -0.04696 | 0.018231 | 0.009998 | 0.95412349 |
| VIT | VITRN | 105 | 0.002125 | 0.000794 | 0.00746 | 1.00212713 |
| LEPRE1 | P3H1 | 10 | -0.01704 | 0.008403 | 0.042597 | 0.98310623 |
| GGT2 | GGT2 | 65 | 0.004095 | 0.001395 | 0.003329 | 1.00410317 |
| NPNT | Nephronectin | 17 | -0.00954 | 0.003216 | 0.003026 | 0.99050964 |
| PTPRR | PTPRR | 6 | 0.013307 | 0.003911 | 0.000669 | 1.01339563 |
| MANBA | MANBA | 106 | -0.00438 | 0.001093 | 6. 11E-05 | 0.99562709 |
| TLL1 | TLL1 | 25 | -0.00573 | 0.002694 | 0.033578 | 0.99429083 |
| VWA1 | VWA1 | 48 | -0.00252 | 0.001024 | 0.014016 | 0.99748673 |
| CCDC126 | CC126 | 82 | 0.003151 | 0.001095 | 0.003995 | 1.0031564 |
| WISP2 | WISP | 143 | 0.001868 | 0.000746 | 0.012281 | 1.00186978 |
| C1QL1 | C1QRF | 38 | 0.005601 | 0.002301 | 0.01491 | 1.005617 |
| ADGRF5 | GP116 | 239 | -0.00248 | 0.000421 | 3.62E-09 | 0.99751911 |
| C14orf93 | CN093 | 28 | 0.003805 | 0.001616 | 0.018564 | 1.00381264 |
| SEMA3C | Sema | 6 | -0.01555 | 0.006859 | 0.023432 | 0.9845751 |
| PCDHGA1 | PCDG1 | 586 | -0.00089 | 0.000406 | 0.027653 | 0.99910596 |
| APOC3 | Apo | 63 | -0.01122 | 0.004582 | 0.014345 | 0.98884311 |
| PMEL | GP100 | 62 | 0.004575 | 0.001907 | 0.01644 | 1.00458574 |
| NCAM2 | NCAM2 | 121 | -0.00166 | 0.000798 | 0.038043 | 0.9983454 |
| PROL1 | PROL1 | 3 | 0.023479 | 0.009139 | 0.010198 | 1.02375723 |
| PLBD2 | LAML2 | 9 | -0.01005 | 0.003398 | 0.003114 | 0.99000392 |
| ICAM4 | ICAM4 | 137 | -0.00299 | 0.000942 | 0.00149 | 0.99701236 |
| LRRTM4 | LRRT4 | 35 | -0.00623 | 0.001949 | 0.001406 | 0.993794 |
| ART4 | ART4 | 341 | 0.000951 | 0.000367 | 0.00965 | 1.00095158 |
| SAYSD1 | SMDC1 | 8 | -0.01521 | 0.007172 | 0.03389 | 0.98490077 |
| NDNF | CD031 | 10 | -0.01991 | 0.009984 | 0.046168 | 0.98028957 |
| CNP | CN37 | 3 | -0.01554 | 0.006512 | 0.017004 | 0.98457829 |
| APLN | APEL | 8 | -0.01191 | 0.005531 | 0.031289 | 0.98815995 |
| PNLIPRP1 | LIPR1 | 55 | -0.00432 | 0.001424 | 0.002449 | 0.995694 |
| NTN1 | NET1 | 53 | 0.002256 | 0.001084 | 0.037478 | 1.00225865 |
| LRP11 | LRP11 | 311 | 0.001033 | 0.000493 | 0.036103 | 1.00103391 |
| SNX8 | SNX8 | 9 | 0.008014 | 0.002734 | 0.003382 | 1.00804597 |
| CNTNAP2 | CNTP2 | 95 | 0.001954 | 0.000866 | 0.024048 | 1.00195598 |
| CD72 | CD72 | 15 | -0.01606 | 0.005382 | 0.002844 | 0.98406635 |
| DNAJB11 | DJB11 | 36 | -0.0112 | 0.002726 | 3.96E-05 | 0.98886063 |
| MRPL52 | RM52 | 5 | -0.0119 | 0.004763 | 0.012481 | 0.98817202 |
| CELA2A | ELA2A | 35 | -0.00765 | 0.002551 | 0.002716 | 0.99238066 |
| TMEM132C | T132C | 67 | -0.00281 | 0.001228 | 0.02193 | 0.99718927 |
| GP5 | GPV | 10 | -0.00923 | 0.003424 | 0.007005 | 0.99080933 |
| ATP1B2 | AT1B2 | 56 | 0.003909 | 0.001608 | 0.015058 | 1.0039167 |
| S100A13 | S100A13 | 291 | 0.001145 | 0.000524 | 0.028963 | 1.00114516 |
| LMAN2 | Lectin | 20 | 0.008267 | 0.002005 | 3.75E-05 | 1.00830103 |
| FMR1 | FMR1 | 5 | 0.011269 | 0.0057 | 0.04806 | 1.01133254 |
| STX2 | STX2 | 43 | 0.002321 | 0.001043 | 0.025994 | 1.00232377 |
| HLA | DQA2 | 85 | -0.01543 | 0.003694 | 2.95E-05 | 0.9846854 |
| EFNB3 | Ephrin | 12 | 0.009285 | 0.003954 | 0.018849 | 1.00932821 |
| CD79A | CD79A | 7 | -0.01169 | 0.00481 | 0.01504 | 0.98837369 |
| C1QTNF5 | C1QTNF5 | 48 | 0.013217 | 0.004144 | 0.001425 | 1.01330465 |
| IGFBPL1 | IBPL1 | 3 | -0.01297 | 0.005887 | 0.027555 | 0.98711229 |
| C1D | C1D | 7 | -0.01847 | 0.007816 | 0.018108 | 0.98169805 |
| SMR3A | SMR3A | 4 | -0.0151 | 0.004981 | 0.002431 | 0.98501186 |
| FAM151A | F151A | 74 | 0.002941 | 0.001255 | 0.019091 | 1.00294552 |
| SPTLC1 | SPTC1 | 4 | -0.0104 | 0.0051 | 0.041444 | 0.98965392 |
| UGT1A6 | UGT | 29 | 0.003915 | 0.00173 | 0.023659 | 1.00392296 |
| ST8SIA2 | SIA8B | 3 | -0. 10788 | 0.019879 | 5.73E-08 | 0.89773336 |

| SYT8 | SYT8 | 4 | -0.01377 | 0.005046 | 0.006358 | 0.98632477 |
| --- | --- | --- | --- | --- | --- | --- |
| CUZD1 | CUZD1 | 12 | -0.0133 | 0.006119 | 0.029675 | 0.98678319 |
| SEMA6A | Semaphorin | 38 | -0.00604 | 0.002262 | 0.007527 | 0.99397419 |
| BTNL9 | BTNL9 | 9 | -0.05132 | 0.018996 | 0.006897 | 0.9499708 |
| CRTAM | CRTAM | 69 | 0.006029 | 0.003064 | 0.049079 | 1.00604704 |
| HRK | HRK | 10 | -0.01816 | 0.009242 | 0.049423 | 0.98200365 |
| FAM177A1 | F177A | 130 | -0.00219 | 0.000835 | 0.008675 | 0.99780999 |
| FTMT | FTMT | 262 | -0.00568 | 0.001175 | 1.33E-06 | 0.99433193 |
| CD3E | CD3E | 70 | -0.00813 | 0.002957 | 0.005956 | 0.9919005 |
| SPACA3 | SACA3 | 10 | 0.050465 | 0.023326 | 0.030507 | 1.05175975 |
| ITM2B | ITM2B | 60 | 0.003137 | 0.001506 | 0.037192 | 1.00314241 |
| RNF13 | RNF13 | 5 | 0.009737 | 0.004535 | 0.031773 | 1.00978446 |
| FUT8 | FUT8 | 287 | -0.00128 | 0.000493 | 0.009607 | 0.9987245 |
| ALK | ALK | 4 | -0.01175 | 0.005937 | 0.047759 | 0.98831604 |
| POMGNT1 | PMGT1 | 4 | -0.04761 | 0.024076 | 0.048005 | 0.95350981 |
| PEAR1 | PEAR1 | 53 | -0.00635 | 0.001417 | 7.41E-06 | 0.99367117 |
| SULF2 | SULF2 | 16 | -0.02509 | 0.008709 | 0.003962 | 0.97521872 |
| DPEP2 | DPEP2 | 88 | -0.0055 | 0.001099 | 5.51E-07 | 0.99451356 |
| UST | UST | 32 | -0.0128 | 0.003455 | 0.000213 | 0.98728546 |
| COX7A1 | CX7A1 | 18 | -0.01017 | 0.005102 | 0.046177 | 0.98987957 |
| QSOX2 | QSOX2 | 255 | 0.001919 | 0.000455 | 2.52E-05 | 1.00192044 |
| RARRES1 | RAR | 615 | 0.000943 | 0.000346 | 0.006477 | 1.00094382 |
| PLVAP | PLVAP | 14 | -0.00826 | 0.002907 | 0.004507 | 0.99177721 |
| TRAPPC5 | TPPC5 | 8 | -0.01547 | 0.007695 | 0.044337 | 0.98464596 |
| GPC1 | Glypican | 81 | 0.002089 | 0.001063 | 0.049395 | 1.00209161 |
| CRIM1 | CRIM1 | 3 | -0.01423 | 0.00581 | 0.014311 | 0.98587051 |
| A4GALT | a1 | 147 | 0.002861 | 0.000827 | 0.00054 | 1.00286468 |
| DCUN1D5 | DCNL5 | 87 | 0.002802 | 0.001211 | 0.02068 | 1.00280628 |
| FAM171B | F171B | 11 | 0.006288 | 0.003083 | 0.041406 | 1.00630792 |
| DPEP1 | DPEP1 | 128 | -0.00271 | 0.000861 | 0.001614 | 0.99728949 |
| CENPV | CENPV | 6 | 0.008258 | 0.00295 | 0.005119 | 1.00829255 |
| PILRA | PILRA | 24 | -0.00465 | 0.002115 | 0.027824 | 0.99535888 |
| PLA2G2C | PA2GC | 3 | -0.02371 | 0.009371 | 0.011402 | 0.97656791 |
| BATF3 | BATF3 | 11 | -0.00714 | 0.002497 | 0.004234 | 0.99288439 |
| CACNA2D3 | CA2D3 | 94 | 0.002535 | 0.001005 | 0.011644 | 1.00253855 |
| KCNMB3 | KCMB3 | 58 | 0.003902 | 0.001371 | 0.004437 | 1.00390957 |
| KCNE5 | KCE1L | 26 | -0.0074 | 0.003046 | 0.015075 | 0.99262288 |
| GNPDA1 | GNPI1 | 5 | 0.021717 | 0.009036 | 0.016241 | 1.02195405 |
| STIM1 | STIM1 | 3 | 0.012479 | 0.005659 | 0.027452 | 1.01255721 |
| TMCC3 | TMCC3 | 75 | 0.003337 | 0.001397 | 0.016942 | 1.00334276 |
| MAP4K1 | M4K1 | 49 | 0.004341 | 0.001968 | 0.02739 | 1.00435041 |
| GLT8D1 | GL8D1 | 77 | -0.00391 | 0.001458 | 0.007292 | 0.99609649 |
| SCARF2 | SREC | 9 | -0.01378 | 0.003851 | 0.000347 | 0.98631856 |
| NRXN1 | NRX1A | 429 | -0.00196 | 0.000405 | 1.28E-06 | 0.99804127 |
| GOLM1 | GOLM1 | 127 | 0.002285 | 0.000874 | 0.008985 | 1.00228726 |
| LCT | LPH | 282 | -0.00174 | 0.000406 | 1.83E-05 | 0.99826141 |
| HAVCR1 | TIM | 78 | -0.00314 | 0.001095 | 0.004147 | 0.99686451 |
| CNTNAP5 | CNTP5 | 13 | -0.00737 | 0.003008 | 0.014295 | 0.99265898 |
| MAN1A2 | MA1A2 | 55 | 0.004094 | 0.001739 | 0.018581 | 1.00410224 |
| MTFR1 | MTFR1 | 8 | 0.005341 | 0.002378 | 0.024702 | 1.00535567 |
| SYT5 | SYT5 | 11 | -0.01476 | 0.006997 | 0.034946 | 0.98535109 |
| UMODL1 | UROL1 | 7 | -0.0149 | 0.006099 | 0.014551 | 0.98520931 |
| MASP1 | MASP3 | 3 | -0.01874 | 0.005381 | 0.000496 | 0.98143138 |
| CCL26 | Eotaxin | 10 | -0.0165 | 0.006703 | 0.013834 | 0.9836356 |
| IFNAR1 | IFN | 189 | -0.00206 | 0.000663 | 0.001899 | 0.9979422 |
| LGALS7 | Galectin | 5 | 0.017763 | 0.006124 | 0.003727 | 1.01792156 |
| UBE2G2 | UB2G2 | 43 | -0.02245 | 0.007649 | 0.003337 | 0.97780294 |
| CRYZL1 | QORL1 | 59 | 0.00469 | 0.001556 | 0.002575 | 1.00470093 |

| SERPINF1 | PEDF | 29 | 0.004073 | 0.001501 | 0.006643 | 1.00408154 |
| --- | --- | --- | --- | --- | --- | --- |
| IMPAD1 | IMPA3 | 68 | -0.00402 | 0.001094 | 0.000242 | 0.99599073 |
| PLXDC1 | PXDC1 | 78 | 0.004673 | 0.001414 | 0.000952 | 1.00468418 |
| SIAE | SIAE | 14 | 0.009133 | 0.003602 | 0.011216 | 1.00917516 |
| CTSO | CATO | 36 | 0.003175 | 0.001521 | 0.036843 | 1.00318027 |
| EPYC | Epiphycan | 33 | -0.00509 | 0.002062 | 0.013607 | 0.9949256 |
| CRISP2 | CRIS2 | 358 | -0.00125 | 0.000425 | 0.00332 | 0.99875288 |
| NMB | NMB | 22 | 0.012312 | 0.002993 | 3.90E-05 | 1.0123878 |
| ERP27 | ERP27 | 3 | -0.03151 | 0.009407 | 0.00081 | 0.96898398 |
| PDGFD | PDGFD | 63 | -0.00544 | 0.001077 | 4.34E-07 | 0.99457315 |
| IL2RB | IL | 35 | -0.00798 | 0.002893 | 0.00578 | 0.99204784 |
| TTC9B | TTC9B | 20 | 0.005352 | 0.002673 | 0.045213 | 1.0053665 |
| ACVR2B | Activin | 6 | -0.01574 | 0.00512 | 0.002114 | 0.98438432 |
| LMAN2 | Lectin | 13 | 0.011731 | 0.005275 | 0.026158 | 1.01179986 |
| TMEM38B | TM38B | 32 | -0.00961 | 0.004347 | 0.027091 | 0.99043849 |
| MNX1 | MNX1 | 6 | -0.01353 | 0.004533 | 0.002846 | 0.98656504 |
| SYT2 | SYT2 | 5 | -0.01149 | 0.005301 | 0.03021 | 0.98857756 |
| NUP210L | P210L | 14 | 0.005632 | 0.002815 | 0.04542 | 1.00564756 |
| ZNF275 | ZN275 | 3 | 0.0184 | 0.007198 | 0.010578 | 1.01857028 |
| IGSF3 | IGSF3 | 38 | -0.00557 | 0.00209 | 0.007658 | 0.99444285 |
| MSH2 | MSH2 | 12 | -0.0159 | 0.006079 | 0.008914 | 0.98422589 |
| NQO2 | Quinone | 242 | 0.001031 | 0.000446 | 0.020933 | 1.00103154 |
| DNER | DNER | 33 | 0.003492 | 0.00171 | 0.041148 | 1.0034981 |
| ISOC1 | ISOC1 | 21 | -0.00463 | 0.002168 | 0.032692 | 0.99537949 |
| IFIT2 | IFIT2 | 13 | 0.008432 | 0.004069 | 0.038258 | 1.00846755 |
| WARS | SYWC | 17 | -0.00621 | 0.001924 | 0.001244 | 0.9938071 |
| ESRRA | ERRalpha | 6 | -0.01624 | 0.006526 | 0.012821 | 0.9838909 |
| ALDOC | aldolase | 5 | -0.01508 | 0.006182 | 0.014708 | 0.98503338 |
| GLO1 | Glyoxalase | 3 | 0.011192 | 0.004901 | 0.02238 | 1.01125508 |
| LRRC4B | LRC4B | 9 | -0.01152 | 0.004294 | 0.007316 | 0.98854863 |
| ADAM15 | ADA15 | 7 | -0.02587 | 0.009872 | 0.008777 | 0.97446194 |
| AMIGO1 | AMGO1 | 3 | 0.091635 | 0.034331 | 0.007603 | 1.09596436 |

GENE,gene;PRO,protein;BETA,beta;SE, standarderror;P, pvalue;OR,Odds Ratio

**Supplementary Table S2 related to sepsis:** 1385 important proteins determined by genes significantly associated with sepsis identified through MR analysis of pQTLs in the Icelandic population(P<5×10-8)

| GENE | PRO | nSNP | BETA | SE | P | OR |
| --- | --- | --- | --- | --- | --- | --- |
| ZNF41 | ZNF41 | 12 | -0. 18348 | 0.089315 | 0.039949 | 0.832371 |
| OCRL | OCRL | 51 | -0.09521 | 0.035453 | 0.00724 | 0.909181 |
| SPDEF | SPDEF | 40 | -0. 15405 | 0.032761 | 2.57E-06 | 0.857232 |
| SNAI2 | SLUG | 7 | -0.32575 | 0.097196 | 0.000804 | 0.721987 |
| VDR | VDR | 23 | -0.20548 | 0.049757 | 3.63E-05 | 0.814258 |
| HOGA1 | HOGA1 | 13 | -0.2217 | 0.074511 | 0.002926 | 0.801155 |
| DUSP4 | DUS4 | 8 | -0.2657 | 0. 108734 | 0.014542 | 0.766668 |
| ZHX3 | ZHX3 | 34 | -0. 1348 | 0.046077 | 0.003439 | 0.873891 |
| SIGLEC12 | SIG12 | 174 | -0.02924 | 0.010619 | 0.0059 | 0.971186 |
| HNF4A | HNF4A | 59 | -0. 14032 | 0.026573 | 1.29E-07 | 0.869079 |
| WNT10A | WN10A | 32 | -0. 18302 | 0.039736 | 4. 11E-06 | 0.832751 |
| NCF2 | NCF | 69 | 0.051302 | 0.01779 | 0.003929 | 1.052641 |
| FANCL | FANCL | 10 | -0.30323 | 0.084405 | 0.000328 | 0.738432 |
| RBBP9 | RBBP9 | 13 | -0. 18033 | 0.081079 | 0.026141 | 0.834996 |
| BRD2 | BRD2 | 5 | -0.22694 | 0. 104608 | 0.030052 | 0.796972 |
| BAG3 | BAG3 | 21 | -0.29686 | 0.063819 | 3.29E-06 | 0.743149 |
| SATB2 | SATB2 | 35 | -0. 14495 | 0.034648 | 2.87E-05 | 0.865065 |
| STAR | STAR | 15 | -0.20367 | 0.069191 | 0.003244 | 0.815728 |
| PIAS4 | PIAS4 | 14 | -0.31985 | 0.084608 | 0.000157 | 0.726257 |
| IL10RA | IL | 63 | -0. 11252 | 0.023519 | 1.72E-06 | 0.893582 |
| STAT3 | STAT3 | 13 | -0. 17979 | 0.076473 | 0.018722 | 0.835447 |
| JUN | c | 39 | -0. 13765 | 0.034861 | 7.87E-05 | 0.871408 |
| B4GALT5 | B4GT5 | 8 | -0.31318 | 0. 116903 | 0.007386 | 0.731121 |
| GOSR2 | GOSR2 | 36 | -0. 17114 | 0.03571 | 1.65E-06 | 0.842701 |
| AGA | ASPG | 15 | -0. 13711 | 0.064452 | 0.033392 | 0.871873 |
| TMEM190 | TM190 | 247 | -0.02708 | 0.007917 | 0.000626 | 0.973288 |
| APOM | ApoM | 75 | 0.065863 | 0.026999 | 0.01471 | 1.06808 |
| SHISA2 | TMM46 | 54 | -0. 12442 | 0.026106 | 1.88E-06 | 0.883007 |
| SCIMP | SCIMP | 5 | -0.50399 | 0. 148883 | 0.000711 | 0.604117 |
| KCNIP3 | CSEN | 7 | -0.34661 | 0. 126673 | 0.006214 | 0.707078 |
| DHX9 | DHX9 | 37 | -0. 16816 | 0.036911 | 5.22E-06 | 0.845216 |
| PSMB6 | PSB6 | 8 | -0.25703 | 0.093896 | 0.006193 | 0.773345 |
| CD99L2 | C99L2 | 19 | -0. 19504 | 0.055017 | 0.000392 | 0.822801 |
| TSPEAR | TSEAR | 36 | -0. 15721 | 0.040826 | 0.000118 | 0.854528 |
| BMPR1B | BMP | 27 | -0. 18863 | 0.043334 | 1.34E-05 | 0.828093 |
| ITM2C | ITM2C | 6 | -0.30868 | 0. 121547 | 0.011099 | 0.734419 |
| PGLYRP3 | PGRP | 30 | -0. 19009 | 0.044529 | 1.96E-05 | 0.826885 |
| LYSMD3 | LYSM3 | 5 | -0.28209 | 0. 114088 | 0.013415 | 0.754205 |
| SLITRK3 | SLIK3 | 82 | -0.07841 | 0.026154 | 0.002719 | 0.924589 |
| SFTA2 | SFTA2 | 18 | -0.2819 | 0.057076 | 7.85E-07 | 0.754349 |
| POMK | SG196 | 29 | -0. 17569 | 0.042524 | 3.60E-05 | 0.838881 |
| NDUFS4 | NDUS4 | 563 | 0.028154 | 0.006825 | 3.70E-05 | 1.028554 |
| TOR1AIP1 | TOIP1 | 39 | 0. 14558 | 0.041045 | 0.00039 | 1. 15671 |
| PLOD3 | PLOD3 | 31 | 0. 121793 | 0.04376 | 0.005382 | 1. 12952 |
| MPZ | MYP0 | 98 | -0.04005 | 0.019533 | 0.040332 | 0.960743 |
| LRP2 | megalin | 9 | -0.27997 | 0.086538 | 0.001216 | 0.75581 |
| MUC1 | MUC1 | 3 | -0.27783 | 0. 12698 | 0.028673 | 0.757428 |
| SPINK13 | ISK13 | 5 | -0.2821 | 0. 137276 | 0.03988 | 0.754198 |
| OLFM3 | NOE3 | 19 | -0. 19465 | 0.056958 | 0.000632 | 0.823121 |
| TMX2 | TMX2 | 40 | -0. 16004 | 0.031865 | 5. 10E-07 | 0.852107 |
| NDUFB4 | NDUB4 | 119 | -0.04607 | 0.01682 | 0.00616 | 0.954973 |
| SUDS3 | SDS3 | 17 | -0.30703 | 0.063251 | 1.21E-06 | 0.735628 |
| GNRH2 | GON2 | 10 | -0. 13351 | 0.066996 | 0.046279 | 0.875016 |
| GAL3ST2 | G3ST2 | 66 | -0. 11494 | 0.024863 | 3.78E-06 | 0.891421 |
| PCDHB2 | PCDB2 | 39 | -0. 17111 | 0.035087 | 1.08E-06 | 0.842725 |

| GRIA4 | GRIA4 | 80 | -0.07407 | 0.02375 | 0.001816 | 0.928604 |
| --- | --- | --- | --- | --- | --- | --- |
| TMED2 | TMED2 | 11 | -0.29975 | 0.08898 | 0.000755 | 0.741004 |
| GPR64 | GPR64 | 12 | -0.33987 | 0.088118 | 0.000115 | 0.711865 |
| SGALNACT | CGAT2 | 24 | -0. 17815 | 0.047962 | 0.000204 | 0.836819 |
| CD300E | CLM2 | 8 | -0.26957 | 0. 111123 | 0.015273 | 0.763711 |
| CD1A | CD1A | 48 | -0. 13827 | 0.028987 | 1.84E-06 | 0.870862 |
| TOMM20L | TO20L | 55 | -0. 12434 | 0.025293 | 8.84E-07 | 0.883084 |
| GCNT4 | GCNT4 | 27 | -0.22118 | 0.051563 | 1.79E-05 | 0.801569 |
| SIGLEC15 | SIG15 | 32 | -0. 16522 | 0.039556 | 2.95E-05 | 0.847705 |
| BTNL3 | BTNL3 | 19 | -0.22826 | 0.055586 | 4.02E-05 | 0.795915 |
| BRAT1 | BRAT1 | 4 | -0.4699 | 0.235295 | 0.045815 | 0.625062 |
| DSC1 | Desmocollin | 19 | -0.21981 | 0.053338 | 3.77E-05 | 0.80267 |
| LCTL | LCTL | 13 | -0.26425 | 0.067545 | 9. 15E-05 | 0.767783 |
| OSMR | OSMR | 18 | -0. 15869 | 0.057041 | 0.005403 | 0.853265 |
| CEACAM4 | CEAM4 | 13 | -0.2802 | 0.073207 | 0.000129 | 0.755633 |
| CYB5D2 | NEUFC | 35 | -0.09475 | 0.034894 | 0.006623 | 0.909605 |
| CALN1 | CABP8 | 25 | -0. 16435 | 0.052081 | 0.001602 | 0.848448 |
| CD58 | sLFA | 18 | -0. 14219 | 0.051979 | 0.006228 | 0.867457 |
| STX6 | Syntaxin | 10 | -0.29869 | 0.080137 | 0.000194 | 0.741788 |
| CLEC10A | CLC10 | 18 | -0.21109 | 0.059968 | 0.000431 | 0.809699 |
| MUCL1 | MUCL1 | 19 | -0. 19291 | 0.049048 | 8.38E-05 | 0.824553 |
| LRRK2 | LRRK2 | 26 | -0. 16507 | 0.050199 | 0.001008 | 0.847837 |
| IL5 | IL | 4 | -0.50836 | 0.23559 | 0.030943 | 0.601483 |
| CLC | LPPL | 8 | -0.36421 | 0.089935 | 5. 13E-05 | 0.694746 |
| TMEM167A | KISHA | 3 | -0.46469 | 0. 193085 | 0.016099 | 0.62833 |
| RAB17 | RAB17 | 63 | -0. 11324 | 0.023009 | 8.59E-07 | 0.89294 |
| BMP15 | BMP15 | 24 | -0.24456 | 0.051709 | 2.25E-06 | 0.783052 |
| CSF2RB | IL3RB | 30 | -0. 19566 | 0.043324 | 6.30E-06 | 0.822293 |
| OLFM3 | NOE3 | 8 | -0.25778 | 0.092739 | 0.005442 | 0.772764 |
| DEFB116 | DB116 | 8 | -0.31719 | 0.093674 | 0.000709 | 0.72819 |
| TBX22 | TBX22 | 4 | -0.33037 | 0. 140607 | 0.018793 | 0.718657 |
| TLR1 | TLR1 | 10 | -0.46274 | 0.097505 | 2.08E-06 | 0.629556 |
| COL6A5 | CO6A5 | 6 | -0.46977 | 0. 138976 | 0.000724 | 0.625149 |
| CCDC64 | BICR1 | 7 | -0.34875 | 0. 121856 | 0.00421 | 0.70557 |
| RNF122 | RN122 | 16 | -0. 13883 | 0.063969 | 0.029985 | 0.870375 |
| EQTN | EQTN | 6 | -0.2493 | 0. 125691 | 0.047322 | 0.77935 |
| FAM162B | F162B | 9 | -0.4027 | 0. 113158 | 0.000373 | 0.668513 |
| TENM2 | TEN2 | 20 | -0.21884 | 0.052128 | 2.69E-05 | 0.803452 |
| MTMR1 | MTMR1 | 37 | -0. 13797 | 0.035911 | 0.000122 | 0.871122 |
| MEGF10 | MEG10 | 22 | -0.24093 | 0.053897 | 7.82E-06 | 0.785898 |
| SMARCC1 | SMRC1 | 26 | -0. 17351 | 0.045332 | 0.000129 | 0.840709 |
| GCH1 | GCH1 | 26 | -0.22542 | 0.047248 | 1.83E-06 | 0.798178 |
| CLEC12A | CL12A | 450 | -0.01646 | 0.006163 | 0.007564 | 0.983675 |
| MYNN | MYNN | 23 | -0.21411 | 0.05441 | 8.32E-05 | 0.807262 |
| PFKFB3 | F263 | 26 | -0.20053 | 0.044448 | 6.43E-06 | 0.818294 |
| KLHL13 | KLH13 | 35 | -0. 16918 | 0.036963 | 4.72E-06 | 0.844353 |
| KCTD5 | KCTD5 | 24 | -0.20902 | 0.047095 | 9.07E-06 | 0.811383 |
| OTUD5 | OTUD5 | 40 | -0. 13343 | 0.03066 | 1.35E-05 | 0.875088 |
| BPTF | BPTF | 14 | -0.23431 | 0.065544 | 0.00035 | 0.791116 |
| PITPNB | PIPNB | 60 | -0. 12016 | 0.026796 | 7.32E-06 | 0.886779 |
| MCTS1 | MCTS1 | 33 | -0. 19454 | 0.049359 | 8. 10E-05 | 0.823213 |
| LAMTOR3 | LTOR3 | 28 | 0.097058 | 0.033138 | 0.003402 | 1. 101924 |
| NUDT16L1 | SDOS | 10 | 0. 15792 | 0.063453 | 0.012819 | 1. 171072 |
| UBA2 | SAE2 | 19 | 0.087413 | 0.04242 | 0.039336 | 1.091347 |
| TBCA | TBCA | 248 | -0.01718 | 0.008651 | 0.047081 | 0.98297 |
| LMOD1 | LMOD1 | 21 | -0.24261 | 0.057514 | 2.46E-05 | 0.78458 |
| ITPKC | IP3KC | 6 | -0.42249 | 0. 111965 | 0.000161 | 0.655411 |
| SLC41A2 | S41A2 | 27 | -0. 17998 | 0.044014 | 4.33E-05 | 0.835287 |

| GLTP | GLTP | 4 | -0.38065 | 0. 156323 | 0.01489 | 0.683414 |
| --- | --- | --- | --- | --- | --- | --- |
| METTL1 | METTL1 | 28 | -0. 14637 | 0.044353 | 0.000967 | 0.863841 |
| UCK2 | UCK2 | 6 | -0.3568 | 0. 108638 | 0.001022 | 0.699909 |
| TEAD4 | TEAD4 | 15 | -0.32923 | 0.069427 | 2. 12E-06 | 0.71948 |
| CDKN2C | CDN2C | 47 | -0. 13682 | 0.029712 | 4. 13E-06 | 0.872127 |
| THRA | THA | 13 | -0.22815 | 0.075745 | 0.002595 | 0.796006 |
| WRNIP1 | WRIP1 | 12 | -0.2425 | 0.07271 | 0.000852 | 0.784663 |
| ERVV | 1 | 20 | -0. 19863 | 0.050742 | 9.06E-05 | 0.81985 |
| CYTH2 | CYH2 | 16 | -0.20861 | 0.054282 | 0.000121 | 0.811709 |
| CALCOCO2 | CACO2 | 7 | -0.35916 | 0. 119268 | 0.002601 | 0.698263 |
| ITCH | ITCH | 48 | -0.09054 | 0.028216 | 0.001333 | 0.913437 |
| EFS | EFS | 22 | -0. 14687 | 0.052566 | 0.005205 | 0.863402 |
| FEN1 | FLAP | 8 | -0.43783 | 0. 117979 | 0.000206 | 0.645433 |
| PSMB5 | PSB5 | 23 | -0.26929 | 0.058144 | 3.63E-06 | 0.763923 |
| IMPA2 | IMPA2 | 9 | -0.35715 | 0. 101421 | 0.000429 | 0.699666 |
| ERCC1 | ERCC1 | 17 | -0.24278 | 0.06978 | 0.000503 | 0.784448 |
| ARL2 | ARL2 | 144 | -0.048 | 0.013704 | 0.000461 | 0.953137 |
| SCMH1 | SCMH1 | 36 | -0. 18419 | 0.034994 | 1.41E-07 | 0.831774 |
| AKR1C1 | Aldo | 12 | -0.36793 | 0.094884 | 0.000105 | 0.692167 |
| 11-Sep | Septin | 12 | -0.24433 | 0.089448 | 0.006304 | 0.783227 |
| PPP2R1A | PP2AAA | 11 | -0. 17025 | 0.055915 | 0.002328 | 0.843451 |
| JARID2 | JARD2 | 31 | -0.20531 | 0.038775 | 1. 19E-07 | 0.814393 |
| KLHL7 | KLHL7 | 6 | -0.60308 | 0. 135761 | 8.90E-06 | 0.547123 |
| SMYD2 | SMYD2 | 6 | -0.59666 | 0. 167938 | 0.000381 | 0.550648 |
| PDK2 | PDK2 | 4 | -0.35629 | 0. 148608 | 0.016505 | 0.700267 |
| NAPB | SNAB | 8 | -0.23626 | 0.087432 | 0.006887 | 0.789572 |
| TST | THTR | 482 | 0.022686 | 0.00759 | 0.0028 | 1.022945 |
| PTPN13 | PTN13 | 11 | -0.34378 | 0. 109002 | 0.001611 | 0.709086 |
| VPS4B | VPS4B | 16 | -0.23558 | 0.054187 | 1.38E-05 | 0.790112 |
| HECW1 | HECW1 | 6 | -0.32559 | 0. 151508 | 0.031633 | 0.722099 |
| CCBL2 | KAT3 | 48 | 0.093054 | 0.031302 | 0.002951 | 1.097521 |
| DPYSL5 | DPYL5 | 11 | -0.33108 | 0.088216 | 0.000175 | 0.71815 |
| RPS6KA6 | KS6A6 | 5 | -0.29501 | 0. 14407 | 0.040594 | 0.744527 |
| ARPC1B | ARC1B | 4 | 0.292776 | 0. 114482 | 0.010546 | 1.340142 |
| 10-Sep | 10-Sep | 53 | -0.06949 | 0.030238 | 0.021548 | 0.932866 |
| DOT1L | DOT1L | 25 | -0. 11475 | 0.045331 | 0.011365 | 0.891593 |
| SH3BGRL | SH3L1 | 11 | -0.24362 | 0.075481 | 0.001249 | 0.783786 |
| ACLY | ACLY | 5 | -0.35436 | 0. 138268 | 0.010382 | 0.701624 |
| HERC1 | HERC1 | 5 | -0.54948 | 0. 181409 | 0.002454 | 0.577247 |
| CDC42BPA | MRCKA | 23 | 0.082303 | 0.032065 | 0.010265 | 1.085785 |
| GJA8 | CXA8 | 3 | -0.52057 | 0. 174973 | 0.002928 | 0.594179 |
| RGS19 | RGS19 | 44 | -0. 13514 | 0.033639 | 5.88E-05 | 0.873591 |
| ZNF175 | ZN175 | 27 | -0. 13722 | 0.046325 | 0.003056 | 0.871783 |
| TAX1BP1 | TAXB1 | 10 | -0.29219 | 0.074811 | 9.39E-05 | 0.746627 |
| NDC80 | KNTC2 | 26 | -0. 17699 | 0.048195 | 0.00024 | 0.837785 |
| PLEKHA7 | PKHA7 | 50 | 0.050403 | 0.02218 | 0.023059 | 1.051695 |
| NISCH | NISCH | 14 | -0.2482 | 0.06564 | 0.000156 | 0.780204 |
| BRDT | BRDT | 9 | -0.34479 | 0.093741 | 0.000235 | 0.708371 |
| ITGB2 | LFA | 15 | -0.21285 | 0.0667 | 0.001417 | 0.808274 |
| CSDC2 | CSDC2 | 22 | -0. 19291 | 0.051842 | 0.000198 | 0.824556 |
| BACH2 | BACH2 | 21 | -0. 16589 | 0.054472 | 0.002323 | 0.847136 |
| GRID2 | GRID2 | 77 | 0.052909 | 0.022425 | 0.018303 | 1.054334 |
| ZNF774 | ZN774 | 18 | -0.26094 | 0.060953 | 1.86E-05 | 0.770325 |
| APBB2 | APBB2 | 4 | 0. 139819 | 0.067195 | 0.037452 | 1. 150066 |
| ZNF180 | ZN180 | 3 | -0.38512 | 0. 179633 | 0.032039 | 0.68037 |
| HMGB3 | HMGB3 | 18 | -0.25065 | 0.063612 | 8. 14E-05 | 0.778293 |
| PIWIL1 | PIWL1 | 3 | -0.52195 | 0. 166411 | 0.00171 | 0.593361 |
| NLRP4 | NALP4 | 10 | -0.35093 | 0.096519 | 0.000277 | 0.704034 |

| SLC4A8 | S4A8 | 15 | -0.25968 | 0.064488 | 5.65E-05 | 0.771296 |
| --- | --- | --- | --- | --- | --- | --- |
| ARHGAP30 | RHG30 | 3 | 0.316932 | 0. 115662 | 0.006141 | 1.372909 |
| ZNF415 | ZN415 | 10 | -0.31934 | 0.086559 | 0.000225 | 0.726626 |
| RNPC3 | RBM40 | 9 | -0.21946 | 0.096808 | 0.023395 | 0.802956 |
| IARS | SYIC | 8 | -0.31424 | 0.091646 | 0.000606 | 0.730344 |
| SLC14A2 | UT2 | 32 | 0.074043 | 0.02419 | 0.002207 | 1.076853 |
| RGS3 | RGS3 | 26 | -0.20688 | 0.047988 | 1.62E-05 | 0.813114 |
| TESC | TESC | 121 | 0.063115 | 0.017231 | 0.000249 | 1.06515 |
| STX10 | STX10 | 7 | 0. 169981 | 0.076392 | 0.026073 | 1. 185282 |
| SNX17 | SNX17 | 10 | -0.27052 | 0.079722 | 0.000691 | 0.76298 |
| NEDD9 | CASL | 11 | -0.27844 | 0.079626 | 0.000471 | 0.756961 |
| NIPAL4 | NIPA4 | 29 | -0. 17195 | 0.043852 | 8.81E-05 | 0.842018 |
| PARP11 | PAR11 | 5 | -0.26672 | 0.098342 | 0.006684 | 0.765884 |
| MICALL2 | MILK2 | 35 | -0. 11105 | 0.035733 | 0.001885 | 0.894892 |
| SYTL1 | SYTL1 | 18 | -0.34033 | 0.072378 | 2.57E-06 | 0.711533 |
| PAXIP1 | PAXI1 | 30 | -0.21953 | 0.040936 | 8. 19E-08 | 0.802893 |
| CUBN | cubilin | 8 | -0.288 | 0. 114483 | 0.011881 | 0.749763 |
| KRT17 | Keratin | 20 | -0.23671 | 0.054339 | 1.32E-05 | 0.789219 |
| AXIN2 | AXIN2 | 42 | -0. 1525 | 0.032067 | 1.98E-06 | 0.858557 |
| NR3C2 | MCR | 12 | -0. 16135 | 0.079425 | 0.042204 | 0.850993 |
| ENOX1 | ENOX1 | 51 | -0. 13956 | 0.027761 | 4.98E-07 | 0.869739 |
| POLR1C | RPAC1 | 57 | -0. 12785 | 0.026011 | 8.86E-07 | 0.879982 |
| RAB18 | RAB18 | 22 | -0.22705 | 0.052515 | 1.54E-05 | 0.796881 |
| UQCRB | UCR6 | 35 | -0. 18966 | 0.041236 | 4.24E-06 | 0.827243 |
| STAU2 | STAU2 | 9 | -0.20302 | 0.082996 | 0.014439 | 0.816261 |
| SORBS3 | Vinexin | 3 | -0.30854 | 0. 149185 | 0.038624 | 0.73452 |
| LIN7C | LIN7C | 38 | -0. 14426 | 0.032052 | 6.77E-06 | 0.865663 |
| SRSF7 | SRSF7 | 4 | -0.42982 | 0.208537 | 0.039289 | 0.650623 |
| CUL9 | CUL9 | 23 | -0.21128 | 0.048147 | 1. 14E-05 | 0.809548 |
| LCN10 | LCN10 | 66 | -0. 10898 | 0.023375 | 3. 13E-06 | 0.896747 |
| RPS10 | RS10 | 68 | -0. 11484 | 0.021984 | 1.75E-07 | 0.891513 |
| PARK2 | PRKN2 | 20 | -0. 19757 | 0.053061 | 0.000196 | 0.82072 |
| FRS2 | FRS2 | 16 | -0. 19316 | 0.058348 | 0.000932 | 0.824351 |
| CBX7 | CBX7 | 4 | -0.36422 | 0. 150352 | 0.015416 | 0.694737 |
| BECN1 | BECN1 | 25 | -0.20392 | 0.053999 | 0.000159 | 0.815531 |
| PPP1R8 | PP1R8 | 21 | -0.23418 | 0.045841 | 3.25E-07 | 0.791222 |
| TRAF4 | TRAF4 | 6 | -0.3458 | 0. 129749 | 0.007695 | 0.707652 |
| KCNA10 | KCA10 | 44 | -0. 13696 | 0.033429 | 4. 19E-05 | 0.872006 |
| ATAD2 | ATAD2 | 13 | -0.34312 | 0.087314 | 8.50E-05 | 0.709552 |
| SLC6A14 | S6A14 | 25 | -0. 121 | 0.043235 | 0.00513 | 0.886032 |
| PSD | PSD1 | 56 | -0.09145 | 0.026386 | 0.000529 | 0.91261 |
| SLC6A16 | S6A16 | 9 | -0.29435 | 0. 112252 | 0.008736 | 0.745017 |
| RFK | RIFK | 34 | -0. 16612 | 0.039034 | 2.08E-05 | 0.846948 |
| CCS | CCS | 35 | -0. 12213 | 0.036132 | 0.000725 | 0.885038 |
| ANP32A | AN32A | 23 | -0.23039 | 0.054948 | 2.75E-05 | 0.794224 |
| FXR1 | FXR1 | 10 | -0.24379 | 0.079533 | 0.002175 | 0.783655 |
| CETN2 | CETN2 | 13 | -0.29526 | 0.086324 | 0.000625 | 0.744335 |
| VARS | SYVC | 114 | -0.04252 | 0.016628 | 0.010559 | 0.958374 |
| GLP1R | GLP1R | 7 | -0.22969 | 0. 102852 | 0.025538 | 0.794783 |
| BTC | BTC | 13 | -0. 12685 | 0.051972 | 0.014654 | 0.880862 |
| S100A6 | S100A6 | 24 | -0. 10889 | 0.0514 | 0.034136 | 0.89683 |
| BCL2L2 | Apoptosis | 16 | -0.20434 | 0.061413 | 0.000877 | 0.815189 |
| EFNB1 | EFNB1 | 3 | -0.21236 | 0. 10796 | 0.049178 | 0.808671 |
| LYPD3 | LYPD3 | 26 | -0.09595 | 0.042393 | 0.02362 | 0.908513 |
| NEGR1 | NEGR1 | 21 | -0. 10503 | 0.048468 | 0.030231 | 0.900295 |
| BCL6 | BCL6 | 26 | -0.23186 | 0.043149 | 7.72E-08 | 0.793055 |
| FLRT2 | FLRT2 | 72 | 0.069049 | 0.024563 | 0.004937 | 1.071488 |
| HK1 | HXK1 | 49 | -0. 137 | 0.028275 | 1.26E-06 | 0.871966 |

| MDM2 | MDM2 | 7 | -0.34244 | 0. 114591 | 0.002805 | 0.710038 |
| --- | --- | --- | --- | --- | --- | --- |
| WNT3A | WNT3A | 53 | 0.096137 | 0.035044 | 0.006082 | 1. 10091 |
| SHANK3 | SHAN3 | 60 | 0.046854 | 0.021188 | 0.027015 | 1.047969 |
| CYB561D1 | C56D1 | 26 | -0. 13251 | 0.048459 | 0.006247 | 0.875891 |
| C5orf63 | YD286 | 27 | -0. 15602 | 0.049024 | 0.00146 | 0.855542 |
| RNF34 | RNF34 | 16 | -0.2619 | 0.061356 | 1.97E-05 | 0.769589 |
| ATP1B1 | AT1B1 | 73 | 0.060777 | 0.020133 | 0.002538 | 1.062662 |
| DEFB4A | HBD | 113 | -0.0681 | 0.023814 | 0.004241 | 0.934166 |
| RELL1 | RELL1 | 10 | -0. 14834 | 0.065409 | 0.023335 | 0.862135 |
| TMEM167B | KISHB | 4 | -0.53801 | 0.207132 | 0.009392 | 0.583907 |
| ENOX2 | ENOX2 | 12 | -0.25423 | 0.093498 | 0.006545 | 0.775511 |
| WFDC10A | WF10A | 20 | -0. 17601 | 0.059795 | 0.003245 | 0.83861 |
| SLC14A1 | UT1 | 13 | -0.28931 | 0.076213 | 0.000147 | 0.748781 |
| FAM159A | F159A | 9 | -0.36494 | 0. 109831 | 0.000891 | 0.694238 |
| IL20RB | IL | 37 | 0. 18301 | 0.047264 | 0.000108 | 1.200826 |
| CHRD | CHRD | 28 | 0. 143971 | 0.05406 | 0.007741 | 1. 15485 |
| IQCF3 | IQCF3 | 17 | -0.35717 | 0.063858 | 2.23E-08 | 0.699651 |
| DIXDC1 | DIXC1 | 9 | -0.2824 | 0. 114897 | 0.013978 | 0.753974 |
| FNDC4 | FNDC4 | 9 | -0.36609 | 0.090885 | 5.62E-05 | 0.693441 |
| SMIM13 | SIM13 | 7 | -0.39493 | 0. 126536 | 0.001802 | 0.673726 |
| RCAN1 | CCP1 | 34 | -0.25623 | 0.044321 | 7.42E-09 | 0.773964 |
| NEURL4 | NEUL4 | 12 | -0.23387 | 0.077507 | 0.002549 | 0.791464 |
| PTH1R | PTH1R | 13 | -0.23658 | 0.074975 | 0.001603 | 0.789324 |
| ITPKA | IP3KA | 9 | -0.30401 | 0.086059 | 0.000412 | 0.737852 |
| FAM171A2 | F1712 | 15 | -0.25414 | 0.074999 | 0.000703 | 0.775586 |
| COL1A1 | CO1A1 | 4 | -0.33645 | 0. 148965 | 0.023911 | 0.714304 |
| MPP6 | MPP6 | 18 | -0.25193 | 0.056332 | 7.74E-06 | 0.777298 |
| PDE6D | PDE6D | 9 | -0.33042 | 0.093603 | 0.000415 | 0.71862 |
| GRID1 | GRID1 | 13 | -0.32824 | 0.076872 | 1.95E-05 | 0.720188 |
| SLC26A11 | S2611 | 29 | -0. 17297 | 0.042889 | 5.51E-05 | 0.841165 |
| DUS2 | DUS2L | 36 | -0. 14202 | 0.035313 | 5.78E-05 | 0.867608 |
| TRADD | TRADD | 33 | -0. 16186 | 0.036179 | 7.68E-06 | 0.850562 |
| SCAMP5 | SCAM5 | 13 | -0.30469 | 0.093193 | 0.001078 | 0.737352 |
| ATP2A3 | AT2A3 | 17 | -0. 19896 | 0.061562 | 0.00123 | 0.819585 |
| HNRNPR | HNRPR | 9 | -0.34989 | 0. 103951 | 0.000763 | 0.704769 |
| RAB35 | Rab | 65 | -0. 11321 | 0.027466 | 3.76E-05 | 0.892963 |
| PTCHD3 | PTHD3 | 5 | -0.29369 | 0. 115761 | 0.01118 | 0.745509 |
| KCNG4 | KCNG4 | 37 | -0. 13858 | 0.034971 | 7.41E-05 | 0.870593 |
| KCNN1 | KCNN1 | 37 | -0. 15608 | 0.033819 | 3.93E-06 | 0.85549 |
| GPR26 | GPR26 | 31 | -0. 1586 | 0.039511 | 5.97E-05 | 0.853341 |
| MYCT1 | MYCT1 | 18 | -0.25432 | 0.060864 | 2.93E-05 | 0.775441 |
| PPAPDC1A | PPC1A | 35 | -0. 1568 | 0.035125 | 8.04E-06 | 0.854875 |
| ADAM29 | ADA29 | 10 | -0.28065 | 0.090425 | 0.001912 | 0.755296 |
| REPIN1 | REPI1 | 14 | -0.22032 | 0.065325 | 0.000744 | 0.80226 |
| PVRL3 | Nectin | 21 | -0.22385 | 0.055096 | 4.85E-05 | 0.799432 |
| PSMD11 | PSD11 | 3 | -0.32774 | 0. 162541 | 0.043764 | 0.720552 |
| ARPC3 | p21 | 9 | -0.36523 | 0. 111844 | 0.001092 | 0.694035 |
| RND1 | RND1 | 18 | -0.32915 | 0.059629 | 3.39E-08 | 0.719535 |
| RACGAP1 | RGAP1 | 288 | 0.031972 | 0.00773 | 3.53E-05 | 1.032488 |
| ANXA9 | ANXA9 | 5 | -0.39498 | 0. 119935 | 0.00099 | 0.673696 |
| PRIM1 | PRI1 | 4 | -0.3235 | 0. 139529 | 0.02042 | 0.723609 |
| THTPA | THTPA | 27 | -0.23104 | 0.049186 | 2.64E-06 | 0.793709 |
| RAB27B | RB27B | 26 | -0.21915 | 0.045911 | 1.81E-06 | 0.803201 |
| RABEPK | RABEK | 46 | -0. 11576 | 0.032655 | 0.000393 | 0.890692 |
| RFESD | RFESD | 9 | 0.344523 | 0. 114277 | 0.002571 | 1.411317 |
| NEURL1 | NEUL1 | 41 | -0. 15365 | 0.034072 | 6.49E-06 | 0.857569 |
| ANXA10 | ANX10 | 18 | -0.28713 | 0.060815 | 2.34E-06 | 0.750412 |
| AK5 | Adenylate | 21 | -0.22393 | 0.053939 | 3.30E-05 | 0.799368 |

| MAD1L1 | MD1L1 | 23 | -0. 1968 | 0.050324 | 9.20E-05 | 0.821352 |
| --- | --- | --- | --- | --- | --- | --- |
| ASNA1 | ASNA | 13 | -0. 16107 | 0.049311 | 0.001089 | 0.851231 |
| RBBP5 | RB | 10 | -0.26207 | 0.083811 | 0.001766 | 0.769454 |
| PIR | PIR | 54 | 0.041006 | 0.02078 | 0.048458 | 1.041859 |
| DHX38 | PRP16 | 30 | -0. 16747 | 0.041589 | 5.65E-05 | 0.845798 |
| MACROD1 | MACD1 | 46 | -0. 1318 | 0.03024 | 1.31E-05 | 0.876513 |
| PDGFC | PDGF | 29 | -0. 15755 | 0.040369 | 9.51E-05 | 0.854232 |
| PPP2R3A | PP2A | 47 | -0.08187 | 0.032451 | 0.011638 | 0.921389 |
| HSPA6 | HSP76 | 33 | -0. 17372 | 0.038275 | 5.66E-06 | 0.840532 |
| CCT7 | TCPH | 10 | -0. 1557 | 0.06666 | 0.019505 | 0.855814 |
| INHBB | Inhibin | 39 | 0. 102955 | 0.034491 | 0.002836 | 1. 108441 |
| CSNK2A2 | CSK22 | 32 | -0. 156 | 0.038918 | 6. 11E-05 | 0.855558 |
| KIAA0319L | K319L | 17 | -0.24929 | 0.05936 | 2.67E-05 | 0.779354 |
| CLTC | CLH1 | 15 | -0.26199 | 0.061732 | 2.20E-05 | 0.769516 |
| PAK4 | PAK4 | 4 | -0.26556 | 0. 132006 | 0.044249 | 0.766778 |
| SPOP | SPOP | 8 | -0.24989 | 0.095484 | 0.008868 | 0.778886 |
| SFXN5 | SFXN5 | 22 | -0. 11045 | 0.049421 | 0.025429 | 0.895434 |
| PKD2 | PKD2 | 6 | -0.39391 | 0. 177481 | 0.026457 | 0.674416 |
| RMI1 | RMI1 | 25 | -0.22599 | 0.053326 | 2.26E-05 | 0.79773 |
| PSMD9 | PSMD9 | 6 | 0.208808 | 0.082579 | 0.011452 | 1.232208 |
| ARHGEF7 | COOL | 42 | -0. 15552 | 0.031608 | 8.65E-07 | 0.85597 |
| NAB1 | NAB1 | 4 | -0.28135 | 0. 116578 | 0.015805 | 0.754765 |
| FARS2 | SYFM | 22 | -0. 16998 | 0.049986 | 0.000673 | 0.843683 |
| DDX23 | DDX23 | 30 | -0. 19937 | 0.047158 | 2.36E-05 | 0.819245 |
| NUDT12 | NUD12 | 73 | -0.05269 | 0.021091 | 0.012485 | 0.948676 |
| GABBR2 | GABR2 | 17 | 0. 133557 | 0.05455 | 0.014351 | 1. 142887 |
| AGAP3 | AGAP3 | 16 | -0.25297 | 0.066993 | 0.000159 | 0.776493 |
| MYOM3 | MYOM3 | 39 | -0. 13298 | 0.031226 | 2.06E-05 | 0.87548 |
| HSD17B14 | DHB14 | 18 | -0.21008 | 0.063764 | 0.000985 | 0.810517 |
| BARD1 | BARD1 | 17 | -0.28654 | 0.067562 | 2.22E-05 | 0.750854 |
| DDX25 | DDX25 | 20 | -0.21766 | 0.053199 | 4.29E-05 | 0.8044 |
| SMURF2 | SMUF2 | 14 | -0.24863 | 0.08285 | 0.002691 | 0.779868 |
| EIF4G3 | IF4G3 | 8 | -0.24894 | 0.096004 | 0.009513 | 0.779626 |
| FBL | FBRL | 39 | -0. 14706 | 0.034627 | 2. 17E-05 | 0.863246 |
| CHD7 | CHD7 | 3 | -0.46313 | 0. 157259 | 0.003229 | 0.629312 |
| EDA | EDA | 33 | -0. 16905 | 0.042688 | 7.49E-05 | 0.844469 |
| TNFRSF9 | 4 | 4 | -0.30576 | 0. 134043 | 0.022545 | 0.736563 |
| IL17F | IL | 13 | -0.24842 | 0.075294 | 0.000969 | 0.780034 |
| PIK3C2A | P3C2A | 43 | -0. 13718 | 0.030862 | 8.79E-06 | 0.871813 |
| TACSTD2 | GA733 | 5 | -0.53456 | 0. 144569 | 0.000218 | 0.585927 |
| EEA1 | EEA1 | 42 | -0. 14055 | 0.031846 | 1.02E-05 | 0.868878 |
| NCOA2 | NCOA2 | 21 | -0. 15198 | 0.053194 | 0.004275 | 0.859004 |
| CGA | Glycoprotein | 17 | -0.36657 | 0.077063 | 1.97E-06 | 0.693105 |
| NCF4 | NCF4 | 25 | -0.23886 | 0.049271 | 1.25E-06 | 0.787522 |
| ITSN1 | ITSN1 | 15 | -0.2378 | 0.072475 | 0.001034 | 0.788359 |
| SHC2 | SHC2 | 5 | -0.41677 | 0. 163993 | 0.011042 | 0.659174 |
| IL18R1 | IL | 172 | 0.023182 | 0.011596 | 0.045594 | 1.023452 |
| C1QC | C1QC | 154 | -0.02523 | 0.012602 | 0.045247 | 0.975082 |
| CNTFR | CNTFR | 30 | 0.088964 | 0.039361 | 0.023809 | 1.093041 |
| RELT | RELT | 31 | -0. 1602 | 0.040583 | 7.90E-05 | 0.851974 |
| RNF43 | RNF43 | 29 | -0. 17134 | 0.042001 | 4.52E-05 | 0.842537 |
| TNFRSF10D | TRAIL | 21 | -0.25228 | 0.058061 | 1.39E-05 | 0.777023 |
| ZNRF3 | ZNRF3 | 8 | -0.49744 | 0. 116782 | 2.05E-05 | 0.608083 |
| IFNA10 | IFN10 | 6 | -0.32512 | 0. 103653 | 0.001709 | 0.72244 |
| RXFP1 | RXFP1 | 10 | -0.25821 | 0.079039 | 0.001088 | 0.772435 |
| NRG4 | NRG4 | 3 | -0.3166 | 0. 144504 | 0.028458 | 0.728624 |
| IL36B | IL | 8 | -0.25415 | 0.093415 | 0.006516 | 0.775578 |
| ISG15 | UCRP | 33 | 0.056896 | 0.024365 | 0.019535 | 1.058546 |

| YWHAE | 14 | 10 | -0.31568 | 0.078301 | 5.54E-05 | 0.729295 |
| --- | --- | --- | --- | --- | --- | --- |
| PDCL2 | PDCL2 | 7 | -0.30197 | 0. 136347 | 0.026779 | 0.739358 |
| PRDM1 | PRDM1 | 40 | -0. 15304 | 0.03162 | 1.30E-06 | 0.858099 |
| APBB1 | APBB1 | 27 | -0. 14849 | 0.040874 | 0.00028 | 0.862007 |
| RBP7 | RET7 | 28 | -0. 11604 | 0.040684 | 0.004341 | 0.890439 |
| DDX46 | DDX46 | 59 | -0. 11011 | 0.02655 | 3.36E-05 | 0.895735 |
| BHMT2 | BHMT2 | 44 | -0. 10134 | 0.037194 | 0.006437 | 0.903625 |
| MOCS3 | MOCS3 | 56 | -0. 1315 | 0.025835 | 3.58E-07 | 0.87678 |
| SNX7 | SNX7 | 41 | -0. 12954 | 0.031568 | 4.07E-05 | 0.878503 |
| MID2 | TRIM1 | 13 | -0.29538 | 0.083182 | 0.000384 | 0.744251 |
| RAB14 | RAB14 | 10 | -0.21517 | 0.078572 | 0.006172 | 0.806406 |
| NFATC1 | NF | 35 | -0. 14963 | 0.036154 | 3.49E-05 | 0.861027 |
| PPIL2 | PPIL2 | 48 | -0. 14145 | 0.028209 | 5.32E-07 | 0.868095 |
| DIDO1 | DIDO1 | 3 | -0.35853 | 0. 146091 | 0.014122 | 0.698705 |
| DYNLT1 | DYLT1 | 18 | -0. 16673 | 0.056296 | 0.00306 | 0.846427 |
| RCVRN | RECO | 26 | -0.21217 | 0.045251 | 2.75E-06 | 0.808829 |
| TRAPPC3 | TPPC3 | 62 | -0. 14088 | 0.027837 | 4. 17E-07 | 0.868592 |
| MSTN | Myostatin | 10 | -0.3395 | 0.094422 | 0.000324 | 0.712123 |
| CTCF | CTCF | 7 | -0.29156 | 0. 118802 | 0.014122 | 0.747099 |
| DUSP16 | DUS16 | 21 | -0.27923 | 0.053541 | 1.84E-07 | 0.75637 |
| TMEM185A | T185A | 43 | -0. 12489 | 0.0288 | 1.45E-05 | 0.882597 |
| GSTA4 | GSTA4 | 60 | -0. 11896 | 0.025637 | 3.48E-06 | 0.887845 |
| SKIL | SKIL | 7 | -0.21844 | 0.091083 | 0.016472 | 0.803768 |
| AKT2 | PKB | 48 | -0.06445 | 0.02338 | 0.005838 | 0.937581 |
| PLIN3 | M6PBP | 18 | -0.27906 | 0.056633 | 8.33E-07 | 0.756497 |
| ZNF276 | ZN276 | 70 | -0. 11389 | 0.021522 | 1.21E-07 | 0.892357 |
| FIGF | VEGF | 5 | -0.30449 | 0. 129591 | 0.018791 | 0.737496 |
| S100A3 | S100A3 | 12 | -0.24388 | 0.077124 | 0.001566 | 0.783581 |
| CCDC134 | CC134 | 16 | 0.265902 | 0.058196 | 4.90E-06 | 1.304608 |
| IGJ | IgJ | 14 | -0.27492 | 0.07323 | 0.000174 | 0.759637 |
| PRC1 | PRC1 | 13 | -0.28665 | 0.07497 | 0.000132 | 0.750771 |
| MAD2L1 | MD2L1 | 19 | -0.26405 | 0.057896 | 5. 10E-06 | 0.767932 |
| CUTC | CUTC | 15 | -0.31005 | 0.0645 | 1.53E-06 | 0.733411 |
| S100A10 | Calpactin | 20 | -0. 1454 | 0.056774 | 0.010437 | 0.864677 |
| RBBP4 | RBBP4 | 6 | -0.27434 | 0. 129774 | 0.034516 | 0.760072 |
| IFNG | IFN | 23 | -0.2579 | 0.05242 | 8.66E-07 | 0.772676 |
| SCG5 | 7B2 | 71 | -0. 11141 | 0.021387 | 1.90E-07 | 0.894574 |
| ANKRD1 | ANKR1 | 7 | -0.38677 | 0. 11887 | 0.001139 | 0.679248 |
| GKN1 | CA11 | 22 | -0.23823 | 0.049395 | 1.41E-06 | 0.788025 |
| NRP2 | Neuropilin | 84 | 0.068481 | 0.028319 | 0.015597 | 1.07088 |
| GAL | Galanin | 46 | -0. 15304 | 0.032312 | 2. 18E-06 | 0.858094 |
| GAS6 | GAS | 56 | -0.06025 | 0.026063 | 0.020787 | 0.941527 |
| ID1 | ID | 5 | -0.45471 | 0. 190833 | 0.017184 | 0.634634 |
| IFNA4 | IFNA4 | 8 | -0.33713 | 0. 101307 | 0.000875 | 0.713817 |
| LDHA | LDHA | 8 | 0.203212 | 0.090042 | 0.024017 | 1.225332 |
| MMP20 | MMP20 | 35 | -0. 17156 | 0.036826 | 3. 18E-06 | 0.842346 |
| OPTC | OPT | 33 | -0. 14662 | 0.037709 | 0.000101 | 0.863625 |
| OTOR | Otoraplin | 82 | 0.045171 | 0.021295 | 0.033907 | 1.046207 |
| PCSK2 | NEC2 | 20 | -0. 15727 | 0.0705 | 0.025695 | 0.854472 |
| AMBP | a1 | 65 | -0. 16397 | 0.029935 | 4.31E-08 | 0.84877 |
| DPP4 | CD26 | 28 | -0.26795 | 0.049351 | 5.65E-08 | 0.764943 |
| CFHR1 | FHR1 | 241 | -0.0201 | 0.010104 | 0.046688 | 0.980103 |
| HS3ST1 | HS3S1 | 18 | -0. 19649 | 0.060562 | 0.001177 | 0.821611 |
| ATRN | Attractin | 67 | 0.042661 | 0.017245 | 0.013367 | 1.043584 |
| LEFTY2 | Lefty | 85 | -0. 1025 | 0.023237 | 1.03E-05 | 0.902582 |
| LEFTY2 | Lefty | 313 | -0.03404 | 0.008671 | 8.66E-05 | 0.966534 |
| NAGLU | NAG | 526 | 0.017128 | 0.006549 | 0.008917 | 1.017275 |
| BCHE | Pseudocholinesterase | 146 | 0.032698 | 0.015667 | 0.036887 | 1.033239 |

| GLIPR2 | GAPR1 | 43 | 0.056577 | 0.028315 | 0.045704 | 1.058208 |
| --- | --- | --- | --- | --- | --- | --- |
| EPHB4 | EphB4 | 43 | 0.052379 | 0.025776 | 0.042148 | 1.053775 |
| ACHE | ACES | 9 | -0.3263 | 0.092233 | 0.000404 | 0.72159 |
| CD247 | CD3 | 8 | -0.30759 | 0. 110355 | 0.005315 | 0.735216 |
| RNASE3 | ECP | 65 | -0.04753 | 0.020808 | 0.022345 | 0.953577 |
| FCRLB | FCRLB | 65 | 0.05297 | 0.023009 | 0.021327 | 1.054398 |
| LILRA2 | LIRA2 | 104 | 0.051669 | 0.016017 | 0.001256 | 1.053027 |
| SLIT1 | SLIT1 | 5 | -0.42245 | 0. 141308 | 0.002794 | 0.655438 |
| SORCS3 | SORC3 | 6 | -0.43561 | 0. 115904 | 0.000171 | 0.646868 |
| BTD | Biotinidase | 119 | 0.053387 | 0.01514 | 0.000422 | 1.054838 |
| BMP2 | BMP | 5 | -0.34453 | 0. 137448 | 0.012189 | 0.708552 |
| BMP8B | BMP | 65 | -0. 1184 | 0.023578 | 5. 12E-07 | 0.888341 |
| C1QL2 | C1QL2 | 50 | -0. 12296 | 0.030243 | 4.79E-05 | 0.884297 |
| INHBC | INHBC | 541 | -0.02395 | 0.00564 | 2. 17E-05 | 0.976332 |
| LMAN1 | Mannose | 22 | -0.25911 | 0.053715 | 1.41E-06 | 0.771738 |
| NODAL | NODAL | 10 | -0.30896 | 0.095751 | 0.001252 | 0.734207 |
| GPT | ALT | 54 | -0. 122 | 0.027084 | 6.65E-06 | 0.885151 |
| CDH8 | Cadherin | 70 | -0. 10758 | 0.021384 | 4.88E-07 | 0.898004 |
| FLT4 | VEGF | 189 | 0.027934 | 0.013016 | 0.031861 | 1.028328 |
| OLR1 | OLR1 | 11 | -0.22492 | 0.084418 | 0.007713 | 0.798579 |
| CFHR5 | complement | 136 | -0.03828 | 0.014965 | 0.010534 | 0.962446 |
| IGF2R | IGF | 106 | 0.035751 | 0.01631 | 0.028384 | 1.036398 |
| WIF1 | WIF | 21 | -0.22601 | 0.049748 | 5.54E-06 | 0.797707 |
| AKR1B10 | Aldose | 59 | -0. 10648 | 0.025339 | 2.64E-05 | 0.898995 |
| LGR5 | LGR5 | 13 | -0.2544 | 0.074439 | 0.000632 | 0.775385 |
| PLA2G2D | sPLA | 3 | -0.30363 | 0. 152065 | 0.045855 | 0.738133 |
| TIGIT | TIGIT | 29 | -0. 16345 | 0.041768 | 9. 10E-05 | 0.849205 |
| BTLA | BTLA | 12 | -0.30058 | 0.072402 | 3.30E-05 | 0.74039 |
| DKKL1 | Soggy | 68 | -0. 13027 | 0.024544 | 1. 11E-07 | 0.877856 |
| CDH6 | Cadherin | 22 | -0. 19524 | 0.05551 | 0.000436 | 0.822635 |
| FLT1 | VEGF | 14 | -0. 13685 | 0.067979 | 0.044109 | 0.872105 |
| ACVRL1 | ALK | 17 | 0.095266 | 0.046162 | 0.039044 | 1.099952 |
| CD320 | CD320 | 8 | -0.27241 | 0. 107412 | 0.01121 | 0.761546 |
| TLR1 | TLR1 | 38 | -0. 12822 | 0.034286 | 0.000184 | 0.87966 |
| STAT5B | STA5B | 46 | -0. 17753 | 0.030378 | 5. 10E-09 | 0.83734 |
| MYOC | MYOC | 80 | -0.08468 | 0.022411 | 0.000158 | 0.918803 |
| B3GNT4 | B3GN4 | 22 | -0.21006 | 0.054559 | 0.000118 | 0.810532 |
| CSN2 | Beta | 26 | -0. 19443 | 0.044917 | 1.50E-05 | 0.823304 |
| CHIA | CHIA | 22 | -0. 18145 | 0.055269 | 0.001027 | 0.834059 |
| FAIM | FAIM1 | 73 | 0. 113646 | 0.022464 | 4.21E-07 | 1. 120356 |
| CASP14 | Caspase | 3 | -0.44808 | 0. 196217 | 0.022394 | 0.638851 |
| INHBB | Activin | 14 | -0.2843 | 0.070017 | 4.90E-05 | 0.75254 |
| BMP3 | BMP | 28 | -0. 18417 | 0.040592 | 5.70E-06 | 0.831793 |
| GDF10 | BMP | 33 | -0. 14837 | 0.038501 | 0.000116 | 0.862113 |
| GDF3 | GDF | 25 | -0.21235 | 0.045622 | 3.25E-06 | 0.808681 |
| OCIAD1 | OCAD1 | 55 | -0. 13334 | 0.027428 | 1. 16E-06 | 0.875165 |
| TNNT3 | TNNT3 | 44 | -0. 15027 | 0.030458 | 8.07E-07 | 0.860474 |
| NME4 | NDKM | 15 | 0. 137616 | 0.061954 | 0.026335 | 1. 147535 |
| FHL1 | SLIM | 34 | -0.20134 | 0.041274 | 1.07E-06 | 0.817636 |
| APOL3 | APOL3 | 178 | -0.02346 | 0.01028 | 0.022507 | 0.976817 |
| CFHR3 | FHR3 | 7 | -0.27834 | 0.09827 | 0.00462 | 0.757042 |
| RGS5 | RGS5 | 17 | -0.28538 | 0.056425 | 4.24E-07 | 0.751732 |
| PDZK1 | NHRF3 | 25 | -0. 19668 | 0.048782 | 5.53E-05 | 0.821451 |
| LSM4 | LSM4 | 56 | -0. 1184 | 0.026207 | 6.24E-06 | 0.888337 |
| RCN3 | RCN3 | 18 | -0.20771 | 0.057768 | 0.000324 | 0.812442 |
| SH3GLB1 | SHLB1 | 7 | -0.49117 | 0. 130862 | 0.000174 | 0.61191 |
| MSRB2 | MSRB2 | 15 | -0.24774 | 0.07817 | 0.001528 | 0.780562 |
| PTRH2 | PTH2 | 4 | -0.30243 | 0. 116829 | 0.009634 | 0.739017 |

| ENPP2 | ENPP2 | 28 | -0.08576 | 0.03758 | 0.022492 | 0.917818 |
| --- | --- | --- | --- | --- | --- | --- |
| RNASET2 | RNT2 | 78 | 0.037485 | 0.017645 | 0.033638 | 1.038196 |
| PFN2 | Profilin | 7 | -0.36132 | 0. 153581 | 0.018641 | 0.696757 |
| SULT1E1 | SULT | 6 | -0.2251 | 0. 10042 | 0.024988 | 0.798435 |
| PTGES3 | TEBP | 58 | -0. 11125 | 0.024013 | 3.61E-06 | 0.894714 |
| ANXA3 | Annexin | 6 | -0.30082 | 0. 10138 | 0.003004 | 0.740209 |
| CALCB | CALCB | 22 | 0. 102905 | 0.042349 | 0.015101 | 1. 108386 |
| MAP2K6 | MP2K6 | 8 | -0.31062 | 0.096771 | 0.001328 | 0.73299 |
| HIF1AN | HIF1N | 5 | -0.42946 | 0. 127688 | 0.00077 | 0.650861 |
| KIR2DL1 | KI2L1 | 37 | -0. 14371 | 0.03491 | 3.85E-05 | 0.866139 |
| PNMT | PNMT | 4 | -0.45533 | 0. 148983 | 0.002241 | 0.634241 |
| SULT2B1 | ST2B1 | 35 | -0. 16695 | 0.035296 | 2.25E-06 | 0.846243 |
| SELH | SELH | 6 | -0.34384 | 0. 109361 | 0.001666 | 0.709042 |
| DUSP23 | DUS23 | 6 | -0.36272 | 0. 124659 | 0.003618 | 0.695784 |
| VAMP2 | VAMP2 | 13 | 0. 174917 | 0.075052 | 0.019775 | 1. 191147 |
| ACAT2 | THIC | 30 | -0.06771 | 0.033001 | 0.040202 | 0.934535 |
| STOML1 | STML1 | 32 | 0.096083 | 0.037687 | 0.010787 | 1. 10085 |
| ZADH2 | ZADH2 | 4 | 0.239983 | 0. 110852 | 0.030396 | 1.271227 |
| SYNJ2BP | SYJ2B | 7 | -0.25988 | 0.099582 | 0.009062 | 0.771145 |
| IL1F10 | IL1FA | 5 | -0.32421 | 0. 1625 | 0.046027 | 0.723097 |
| VHL | VHL | 3 | -0.71543 | 0.2098 | 0.000649 | 0.488981 |
| CCBL1 | KAT1 | 52 | -0. 15405 | 0.029576 | 1.90E-07 | 0.857233 |
| DCUN1D1 | DCNL1 | 46 | -0. 15402 | 0.028131 | 4.37E-08 | 0.857253 |
| NFKBIB | IKB | 9 | -0.33962 | 0. 109496 | 0.001924 | 0.712037 |
| NLGN3 | NLGN3 | 4 | -0.37499 | 0. 152054 | 0.013656 | 0.687294 |
| AK4 | KAD4 | 38 | -0. 15041 | 0.043197 | 0.000498 | 0.860352 |
| ETFA | ETFA | 58 | -0.06868 | 0.028331 | 0.01534 | 0.933624 |
| CD9 | CD9 | 46 | -0. 14366 | 0.032138 | 7.82E-06 | 0.866182 |
| CP | Ceruloplasmin | 73 | -0. 11414 | 0.021402 | 9.66E-08 | 0.892135 |
| FOLR1 | FOLR1 | 58 | -0.06451 | 0.029353 | 0.027956 | 0.937523 |
| IRF1 | IRF1 | 15 | -0.33035 | 0.076093 | 1.42E-05 | 0.71867 |
| SUFU | SUFU | 19 | -0.22176 | 0.05673 | 9.27E-05 | 0.801111 |
| PBK | TOPK | 37 | -0. 15128 | 0.034012 | 8.67E-06 | 0.859605 |
| SIRT3 | SIR3 | 49 | -0.0701 | 0.035665 | 0.049365 | 0.932304 |
| NAALADL1 | NALDL | 55 | -0. 13128 | 0.031389 | 2.89E-05 | 0.876977 |
| SRP14 | SRP14 | 4 | -0.34553 | 0. 156276 | 0.027035 | 0.707847 |
| RPP30 | RPP30 | 29 | -0. 16651 | 0.042785 | 9.95E-05 | 0.846616 |
| RAB3A | Rab3A | 32 | -0. 17574 | 0.037116 | 2. 19E-06 | 0.838837 |
| CA5B | Carbonic | 35 | -0. 16083 | 0.035624 | 6.34E-06 | 0.851437 |
| CD46 | CD46 | 29 | 0.0628 | 0.031484 | 0.046081 | 1.064814 |
| TPP1 | TPP1 | 34 | 0.088779 | 0.031174 | 0.004401 | 1.092839 |
| BTN3A3 | BT3A3 | 374 | -0.02909 | 0.007238 | 5.83E-05 | 0.971326 |
| WBP2 | WBP2 | 5 | -0.33954 | 0. 134729 | 0.011729 | 0.712096 |
| GMNN | GEMI | 13 | -0.29882 | 0.075016 | 6.79E-05 | 0.741695 |
| TPD52L1 | TPD53 | 29 | -0. 19495 | 0.040479 | 1.46E-06 | 0.822879 |
| USH1C | USH1C | 29 | -0.22195 | 0.046466 | 1.78E-06 | 0.800953 |
| PTTG1 | Securin | 3 | -0.36304 | 0. 165127 | 0.027909 | 0.695558 |
| APTX | APTX | 12 | -0. 136 | 0.065191 | 0.036966 | 0.872845 |
| UBE2A | UBE2A | 32 | -0. 15794 | 0.040045 | 8.01E-05 | 0.853901 |
| TRAF1 | TRAF1 | 45 | -0. 14456 | 0.031144 | 3.46E-06 | 0.865406 |
| TP53I3 | QORX | 88 | -0.05281 | 0.018042 | 0.003422 | 0.948561 |
| WDR5 | WDR5 | 9 | -0.44475 | 0. 119943 | 0.000209 | 0.640987 |
| NCF1 | NCF | 64 | 0.056933 | 0.022993 | 0.013282 | 1.058585 |
| CRCP | RPC9 | 26 | -0.23133 | 0.04968 | 3.22E-06 | 0.793477 |
| UBD | UBD | 36 | -0. 15103 | 0.035352 | 1.94E-05 | 0.859825 |
| SNRPD3 | SMD3 | 11 | -0.28082 | 0.092244 | 0.002332 | 0.755166 |
| MMAB | MMAB | 48 | -0.08348 | 0.025424 | 0.001026 | 0.919913 |
| IMPA1 | IMPA1 | 22 | -0. 10882 | 0.04322 | 0.011805 | 0.896888 |

| CUL1 | CUL1 | 16 | -0.25482 | 0.05831 | 1.24E-05 | 0.775056 |
| --- | --- | --- | --- | --- | --- | --- |
| SULT1C2 | ST1C2 | 30 | -0. 18478 | 0.044122 | 2.81E-05 | 0.831287 |
| BPHL | BPHL | 14 | -0.31116 | 0.079786 | 9.62E-05 | 0.732594 |
| DDIT4 | DDIT4 | 17 | -0.27126 | 0.0585 | 3.54E-06 | 0.762419 |
| RERG | RERG | 26 | -0.21898 | 0.045876 | 1.81E-06 | 0.80334 |
| ANXA13 | ANX13 | 4 | -0.36522 | 0. 127967 | 0.004317 | 0.694046 |
| S100A16 | S100A16 | 35 | -0. 1778 | 0.043411 | 4.21E-05 | 0.837113 |
| KLF4 | KLF4 | 7 | -0.37458 | 0. 117462 | 0.001428 | 0.687578 |
| RGS4 | RGS4 | 17 | -0.26787 | 0.060421 | 9.28E-06 | 0.765008 |
| ACADL | ACADL | 10 | -0. 19987 | 0.094215 | 0.033884 | 0.818836 |
| CASP8 | Caspase | 20 | -0. 1747 | 0.063952 | 0.006299 | 0.839706 |
| NAE1 | ULA1 | 18 | -0.27266 | 0.053488 | 3.44E-07 | 0.761348 |
| PCK1 | PCKGC | 53 | -0. 1192 | 0.02574 | 3.64E-06 | 0.88763 |
| ASPA | ACY2 | 47 | -0. 14174 | 0.031234 | 5.68E-06 | 0.867849 |
| CARD18 | ICBR | 34 | -0. 16307 | 0.037626 | 1.47E-05 | 0.849535 |
| MAGEA5 | MAGE | 63 | -0. 11445 | 0.022958 | 6. 19E-07 | 0.891855 |
| FABP9 | FABP9 | 59 | -0. 12075 | 0.024878 | 1.21E-06 | 0.886257 |
| ORAOV1 | ORAV1 | 65 | -0. 122 | 0.023013 | 1. 15E-07 | 0.885148 |
| CD37 | CD37 | 17 | -0. 1952 | 0.086482 | 0.024002 | 0.822671 |
| MAGEA6 | MAGE | 26 | -0.23353 | 0.052486 | 8.61E-06 | 0.791734 |
| CCNB2 | CCNB2 | 63 | -0. 12403 | 0.024993 | 6.95E-07 | 0.883354 |
| SPIN1 | SPIN1 | 44 | -0. 15402 | 0.032266 | 1.81E-06 | 0.857253 |
| SRA1 | SRA1 | 8 | -0.20931 | 0.075547 | 0.005596 | 0.811148 |
| NRIP3 | NRIP3 | 14 | -0.31603 | 0.074383 | 2. 15E-05 | 0.729039 |
| OMP | OMP | 15 | -0.20403 | 0.063901 | 0.001408 | 0.815437 |
| CYB5R1 | NB5R1 | 22 | -0.27411 | 0.053248 | 2.63E-07 | 0.760246 |
| MEOX2 | MEOX2 | 32 | -0. 1276 | 0.050914 | 0.012202 | 0.880204 |
| CCDC25 | CCD25 | 9 | -0.22961 | 0.074357 | 0.002015 | 0.794841 |
| CARD17 | CAR17 | 5 | -0.40421 | 0. 157397 | 0.010226 | 0.667506 |
| TAF10 | TAF10 | 77 | -0. 1033 | 0.020782 | 6.68E-07 | 0.901859 |
| SERF2 | SERF2 | 13 | -0.29842 | 0.071144 | 2.73E-05 | 0.741986 |
| TCL1B | TCL1B | 9 | -0.34819 | 0.091887 | 0.000151 | 0.705962 |
| GNG11 | GBG11 | 44 | -0. 12671 | 0.030685 | 3.64E-05 | 0.880987 |
| SVIP | SVIP | 49 | -0. 11329 | 0.041031 | 0.005763 | 0.892895 |
| ZWINT | ZWINT | 17 | -0.25492 | 0.062706 | 4.80E-05 | 0.77498 |
| ANXA8 | Annexin | 38 | -0. 1609 | 0.037116 | 1.46E-05 | 0.851381 |
| MRAS | RASM | 23 | -0.21727 | 0.048982 | 9. 18E-06 | 0.804713 |
| NAIF1 | NAIF1 | 18 | 0.064967 | 0.032909 | 0.048363 | 1.067124 |
| ZWILCH | ZWILC | 58 | -0. 12537 | 0.024697 | 3.85E-07 | 0.882175 |
| PALM | PALM | 40 | -0. 13313 | 0.03341 | 6.76E-05 | 0.875352 |
| STXBP6 | STXB6 | 38 | -0. 11358 | 0.029475 | 0.000116 | 0.89263 |
| 3-Sep | 3-Sep | 10 | -0.3658 | 0.094587 | 0.00011 | 0.693642 |
| MAGEA8 | MAGA8 | 15 | -0. 19916 | 0.072089 | 0.005732 | 0.819416 |
| SNX5 | SNX5 | 20 | -0. 10997 | 0.055103 | 0.045959 | 0.895857 |
| PYCR2 | P5CR2 | 40 | -0. 13179 | 0.032175 | 4.21E-05 | 0.876528 |
| CPLX1 | CPLX1 | 8 | -0.293 | 0.096615 | 0.002424 | 0.746019 |
| IDH1 | IDH | 14 | -0.08007 | 0.04017 | 0.046215 | 0.923047 |
| PSMB3 | PSB3 | 23 | -0.21682 | 0.056934 | 0.00014 | 0.805072 |
| IL1F5 | IL | 83 | -0. 10658 | 0.019876 | 8.21E-08 | 0.898899 |
| ALB | Albumin | 62 | -0.06745 | 0.02118 | 0.00145 | 0.934775 |
| COMT | Catechol | 28 | 0. 127039 | 0.03388 | 0.000177 | 1. 135462 |
| IFNA1 | IFNA1 | 7 | -0.33288 | 0. 1065 | 0.001774 | 0.716856 |
| AES | AES | 18 | -0.23775 | 0.062677 | 0.000149 | 0.788396 |
| AKAP7 | AKA7A | 41 | -0. 13257 | 0.03195 | 3.34E-05 | 0.875844 |
| ALKBH2 | ALKB2 | 9 | -0.2724 | 0. 109062 | 0.012502 | 0.761551 |
| ANKRD54 | ANR54 | 18 | -0.26048 | 0.057125 | 5. 12E-06 | 0.770684 |
| AP1S2 | AP1S2 | 3 | -0.39246 | 0. 169232 | 0.020393 | 0.675395 |
| ARF4 | ARF4 | 18 | -0. 14767 | 0.046347 | 0.001442 | 0.862714 |

| ARF5 | ARF5 | 19 | -0.22023 | 0.051048 | 1.60E-05 | 0.802333 |
| --- | --- | --- | --- | --- | --- | --- |
| ARL14 | ARL14 | 11 | -0.25539 | 0.068766 | 0.000204 | 0.774615 |
| ARL5A | ARL5A | 6 | -0.28528 | 0. 108239 | 0.008397 | 0.751804 |
| AS3MT | AS3MT | 27 | -0.21369 | 0.044458 | 1.54E-06 | 0.807598 |
| TBPL1 | TBPL1 | 26 | 0. 12835 | 0.053988 | 0.017435 | 1. 136951 |
| PPIG | PPIG | 65 | -0. 11162 | 0.0228 | 9.79E-07 | 0.89438 |
| RABIF | MSS4 | 9 | -0. 18807 | 0.074868 | 0.012002 | 0.828553 |
| ITLN1 | Omentin | 37 | -0. 11931 | 0.041699 | 0.004221 | 0.887535 |
| SGTB | SGTB | 13 | -0.21208 | 0.069956 | 0.002432 | 0.808899 |
| SH2D1B | SH21B | 21 | -0.30603 | 0.053809 | 1.29E-08 | 0.736363 |
| EIF4EBP3 | 4EBP3 | 4 | -0.39372 | 0. 152025 | 0.009602 | 0.674542 |
| CHST2 | CHST2 | 5 | -0.48878 | 0. 135294 | 0.000303 | 0.613376 |
| PPP3R2 | CANB2 | 54 | -0. 12008 | 0.025549 | 2.60E-06 | 0.886853 |
| CD3E | CD3E | 69 | -0. 12761 | 0.023756 | 7.80E-08 | 0.880195 |
| DSCAML1 | DSCL1 | 6 | -0.50568 | 0. 133274 | 0.000148 | 0.603094 |
| ENTPD2 | ENTP2 | 5 | -0.25908 | 0. 122359 | 0.03423 | 0.771763 |
| FABP12 | FBP12 | 16 | -0.24787 | 0.063561 | 9.63E-05 | 0.780463 |
| GPC4 | GPC4 | 4 | -0.27263 | 0. 136633 | 0.046006 | 0.761376 |
| GPR56 | GPR56 | 29 | -0. 18738 | 0.044786 | 2.87E-05 | 0.829132 |
| GPX2 | GPX2 | 4 | -0.38462 | 0. 135315 | 0.004477 | 0.680708 |
| HRAS | H | 4 | -0.2898 | 0. 137833 | 0.035504 | 0.748412 |
| CAMK4 | KCC4 | 3 | -0.2956 | 0. 147913 | 0.045665 | 0.744084 |
| PSMA5 | Proteasome | 64 | 0.052034 | 0.024761 | 0.035603 | 1.053411 |
| RAET1G | RET1G | 48 | -0.09768 | 0.034132 | 0.004212 | 0.906939 |
| TGM4 | TGM4 | 9 | -0.22352 | 0. 100304 | 0.025855 | 0.799701 |
| VLDLR | VLDLR | 62 | -0. 14038 | 0.025507 | 3.72E-08 | 0.869031 |
| PTGR2 | PTGR2 | 35 | -0. 18482 | 0.039824 | 3.47E-06 | 0.831252 |
| LRRC3B | LRC3B | 13 | -0.28197 | 0.073375 | 0.000122 | 0.754295 |
| MECP2 | MECP2 | 7 | -0.44294 | 0. 110095 | 5.74E-05 | 0.642143 |
| TCEAL8 | TCAL8 | 18 | -0.28818 | 0.068171 | 2.36E-05 | 0.749625 |
| UBE2M | UBC12 | 56 | -0. 17158 | 0.035252 | 1. 13E-06 | 0.842331 |
| TK2 | KITM | 8 | 0. 162734 | 0.060157 | 0.006827 | 1. 176723 |
| MUTED | MUTED | 8 | -0.28127 | 0.09811 | 0.004145 | 0.754822 |
| NFKBID | IKBD | 19 | -0. 13767 | 0.044582 | 0.002015 | 0.871385 |
| RPRD1B | C20orf77 | 11 | -0.39139 | 0.093248 | 2.70E-05 | 0.676118 |
| DAP | DAP1 | 297 | -0.01456 | 0.007161 | 0.042081 | 0.985549 |
| MPPED2 | MPPD2 | 11 | -0.28856 | 0.080678 | 0.000348 | 0.749343 |
| PSTPIP1 | PPIP1 | 3 | -0.39905 | 0. 176252 | 0.02357 | 0.67096 |
| GULP1 | GULP1 | 57 | -0. 12678 | 0.025271 | 5.26E-07 | 0.880927 |
| HOPX | HOP | 12 | -0.28632 | 0.0731 | 8.97E-05 | 0.751024 |
| ACVR2A | Activin | 39 | -0. 18397 | 0.03372 | 4.88E-08 | 0.831963 |
| SPINK4 | ISK4 | 55 | -0. 10897 | 0.026146 | 3.08E-05 | 0.896755 |
| NDRG1 | NDRG1 | 12 | -0.24514 | 0.071235 | 0.000579 | 0.782593 |
| DDT | D | 64 | -0.05679 | 0.025347 | 0.025051 | 0.944789 |
| ARF1 | ARF1 | 4 | -0.29746 | 0. 1109 | 0.007313 | 0.742701 |
| RBP5 | RBP | 12 | -0. 11497 | 0.051717 | 0.026214 | 0.891394 |
| PFDN1 | PFD1 | 5 | -0.29507 | 0. 136488 | 0.030626 | 0.744477 |
| UBE2D1 | UB2D1 | 45 | -0. 13204 | 0.029443 | 7.30E-06 | 0.876302 |
| RPA2 | RFA2 | 10 | -0.27589 | 0.071237 | 0.000108 | 0.758897 |
| RBP1 | CRBP | 15 | -0.21993 | 0.062912 | 0.000472 | 0.802572 |
| RAB13 | RAB13 | 5 | -0.26664 | 0. 110496 | 0.015817 | 0.765949 |
| CRIPT | CRIPT | 52 | -0. 12906 | 0.027609 | 2.95E-06 | 0.87892 |
| GIMAP6 | GIMA6 | 10 | -0.35268 | 0.093472 | 0.000161 | 0.7028 |
| PET117 | PT117 | 37 | -0. 13135 | 0.034682 | 0.000152 | 0.876907 |
| COPE | COPE | 38 | -0. 16104 | 0.034229 | 2.54E-06 | 0.851261 |
| ACPP | Prostatic | 3 | -0.39774 | 0. 176248 | 0.024027 | 0.671837 |
| EBAG9 | RCAS1 | 129 | 0.039092 | 0.016373 | 0.016964 | 1.039866 |
| HAT1 | Hat 1 | 63 | -0. 11983 | 0.023179 | 2.35E-07 | 0.887075 |

| HIPK3 | HIPK3 | 3 | -0.51875 | 0. 188637 | 0.005959 | 0.595262 |
| --- | --- | --- | --- | --- | --- | --- |
| LZIC | LZIC | 6 | -0.38675 | 0. 188828 | 0.040544 | 0.679261 |
| OSTM1 | OSTM1 | 14 | -0.2899 | 0.070107 | 3.55E-05 | 0.748338 |
| TOM1L2 | TM1L2 | 64 | -0. 11944 | 0.023002 | 2.08E-07 | 0.887421 |
| LRRTM1 | LRRT1 | 48 | -0.06483 | 0.023867 | 0.0066 | 0.937225 |
| MATN3 | MATN3 | 293 | -0.02716 | 0.009147 | 0.002981 | 0.973202 |
| PEX26 | PEX26 | 28 | -0. 16109 | 0.042847 | 0.00017 | 0.851217 |
| MDGA2 | MDGA2 | 279 | 0.022487 | 0.00983 | 0.02217 | 1.022741 |
| MTCP1 | MTCP1 | 21 | -0. 17031 | 0.049395 | 0.000565 | 0.843401 |
| RGS21 | RGS21 | 26 | 0. 187794 | 0.059684 | 0.001653 | 1.206585 |
| DDAH1 | DDAH1 | 252 | 0.033018 | 0.011198 | 0.003193 | 1.033569 |
| VEGFA | L | 122 | 0.030047 | 0.014261 | 0.03512 | 1.030503 |
| RBKS | RBSK | 17 | -0.27263 | 0.060878 | 7.52E-06 | 0.761373 |
| KDSR | KDSR | 54 | -0. 13525 | 0.02775 | 1.09E-06 | 0.873496 |
| GLYAT | GLYAT | 10 | -0.47372 | 0.093556 | 4. 12E-07 | 0.622682 |
| DCUN1D2 | DCNL2 | 5 | -0.2736 | 0.09846 | 0.005455 | 0.760633 |
| HK3 | HXK3 | 39 | -0. 15 | 0.03287 | 5.03E-06 | 0.860709 |
| PARK7 | Oxidized | 46 | -0. 14892 | 0.029127 | 3. 17E-07 | 0.861637 |
| LRP4 | LRP4 | 116 | 0.048457 | 0.016626 | 0.003562 | 1.04965 |
| IRF4 | IRF4 | 3 | -0.37061 | 0. 166315 | 0.025856 | 0.690312 |
| CEBPG | CEBPG | 7 | -0.33538 | 0. 100014 | 0.000798 | 0.715063 |
| KPNA1 | IMA5 | 47 | -0. 1146 | 0.03285 | 0.000486 | 0.891722 |
| BRF1 | BRF | 52 | -0. 13462 | 0.030295 | 8.84E-06 | 0.874046 |
| CD81 | CD81 | 12 | -0.29283 | 0.090942 | 0.001282 | 0.746147 |
| NT5C3A | 5NT3 | 14 | -0.25903 | 0.077843 | 0.000876 | 0.771802 |
| RPSA | 40S | 6 | -0.41536 | 0. 108778 | 0.000134 | 0.660101 |
| FGL2 | FGL2 | 31 | -0. 17688 | 0.045146 | 8.93E-05 | 0.837881 |
| PROK1 | EG | 7 | -0.35375 | 0. 120836 | 0.003417 | 0.702052 |
| TGFB1 | TGF | 18 | -0.31831 | 0.073793 | 1.61E-05 | 0.727379 |
| CTSG | Cathepsin | 12 | -0.29716 | 0. 118583 | 0.012212 | 0.742922 |
| FGF8 | FGF | 35 | -0. 15664 | 0.036399 | 1.68E-05 | 0.855011 |
| PLA2G2E | GIIE | 11 | -0.30757 | 0.08655 | 0.00038 | 0.735228 |
| KIT | SCF | 53 | -0. 10772 | 0.030605 | 0.000432 | 0.897882 |
| TIMP3 | TIMP | 195 | -0.02399 | 0.010477 | 0.022027 | 0.976294 |
| GFRA3 | GFRa | 14 | -0.22648 | 0.08209 | 0.005798 | 0.797331 |
| HMGB1 | HMG | 22 | -0.24642 | 0.05859 | 2.60E-05 | 0.781596 |
| TNFRSF8 | CD30 | 30 | -0. 16823 | 0.039351 | 1.91E-05 | 0.845157 |
| TYRO3 | Dtk | 38 | -0. 10837 | 0.036669 | 0.003123 | 0.897294 |
| ERBB4 | ERBB4 | 4 | -0.36115 | 0. 154233 | 0.019203 | 0.696876 |
| IL10RB | IL | 27 | -0. 12154 | 0.040484 | 0.002681 | 0.88556 |
| IL12RB1 | IL | 18 | -0.23711 | 0.058258 | 4.70E-05 | 0.788904 |
| LAYN | Layilin | 41 | -0. 14591 | 0.031636 | 3.99E-06 | 0.864239 |
| LTBR | Lymphotoxin | 65 | -0. 11127 | 0.022512 | 7.71E-07 | 0.894697 |
| MST1R | MSP | 46 | -0. 14109 | 0.02853 | 7.60E-07 | 0.868413 |
| ICAM3 | sICAM | 31 | -0. 1861 | 0.039512 | 2.48E-06 | 0.830187 |
| OSM | OSM | 57 | -0. 12414 | 0.02495 | 6.50E-07 | 0.883254 |
| PECAM1 | PECAM | 51 | -0. 15376 | 0.029721 | 2.30E-07 | 0.85748 |
| PSPN | Persephin | 6 | -0.33275 | 0. 129861 | 0.010396 | 0.716947 |
| TNFRSF13B | TACI | 20 | -0.21771 | 0.050723 | 1.77E-05 | 0.804359 |
| TNFSF18 | TNFSF18 | 33 | -0. 15461 | 0.034967 | 9.80E-06 | 0.85675 |
| IL37 | IL | 55 | -0. 12607 | 0.025211 | 5.71E-07 | 0.881553 |
| NCR2 | NKp44 | 7 | -0.29012 | 0. 113224 | 0.010396 | 0.748171 |
| NOV | NovH | 21 | -0.21676 | 0.050954 | 2. 10E-05 | 0.805127 |
| C3 | C3 | 17 | -0.3014 | 0.066857 | 6.54E-06 | 0.73978 |
| FAM107A | DRR1 | 32 | -0. 17666 | 0.040186 | 1. 10E-05 | 0.838062 |
| FGF20 | FGF | 4 | -0.375 | 0. 168719 | 0.026242 | 0.687291 |
| CCL1 | I | 63 | -0. 11175 | 0.024093 | 3.51E-06 | 0.894265 |
| CCL3L1 | LD78 | 53 | -0. 11657 | 0.028363 | 3.96E-05 | 0.889972 |

| ACVR1B | Activin | 5 | -0.26457 | 0. 117655 | 0.024534 | 0.767539 |
| --- | --- | --- | --- | --- | --- | --- |
| EDA | EDA | 19 | -0. 19263 | 0.048992 | 8.42E-05 | 0.824783 |
| CX3CL1 | Fractalkine | 51 | -0. 12304 | 0.026091 | 2.41E-06 | 0.88423 |
| LCN2 | Lipocalin | 23 | -0. 18206 | 0.050961 | 0.000354 | 0.833555 |
| MMP17 | MMP | 34 | -0. 15793 | 0.039198 | 5.60E-05 | 0.853905 |
| TNFSF4 | OX40 | 5 | -0.52966 | 0. 173484 | 0.002265 | 0.588805 |
| C5 | C5a | 18 | -0. 11986 | 0.05374 | 0.025724 | 0.887045 |
| CHEK1 | CHK1 | 31 | -0. 1883 | 0.038051 | 7.48E-07 | 0.828369 |
| HDAC8 | HDAC8 | 27 | -0. 17183 | 0.041486 | 3.44E-05 | 0.842121 |
| RAD51 | RAD51 | 81 | -0. 11937 | 0.021049 | 1.42E-08 | 0.887484 |
| YES1 | YES | 19 | -0.20175 | 0.064512 | 0.001764 | 0.817296 |
| CTF1 | Cardiotrophin | 18 | -0.24344 | 0.058266 | 2.94E-05 | 0.783923 |
| CFD | Factor | 63 | -0. 12751 | 0.027578 | 3.77E-06 | 0.880282 |
| PLA2G10 | GX | 18 | -0.24653 | 0.057309 | 1.69E-05 | 0.78151 |
| PROC | Protein | 49 | -0.06042 | 0.023755 | 0.010969 | 0.941365 |
| DSG1 | Desmoglein | 62 | -0. 13707 | 0.023923 | 1.01E-08 | 0.87191 |
| IL18RAP | IL | 13 | -0.22349 | 0.071164 | 0.001686 | 0.79972 |
| JAM2 | JAM | 11 | -0.30209 | 0.080337 | 0.00017 | 0.739275 |
| PTPN1 | PTP | 9 | -0.36714 | 0. 100111 | 0.000245 | 0.692711 |
| SIGLEC9 | Siglec | 235 | -0.02386 | 0.007807 | 0.002237 | 0.976419 |
| FGF2 | FGF  b | 154 | -0.03255 | 0.016022 | 0.042221 | 0.967978 |
| CCL23 | Ck | 72 | -0.04696 | 0.015421 | 0.002322 | 0.954121 |
| CLEC4M | DC | 28 | -0. 16704 | 0.05181 | 0.001263 | 0.846163 |
| CCL3 | MIP | 17 | 0.060669 | 0.030206 | 0.044592 | 1.062547 |
| CCL18 | PARC | 95 | 0.031002 | 0.014225 | 0.029301 | 1.031487 |
| IL13 | IL | 15 | -0.33534 | 0.063267 | 1. 16E-07 | 0.715094 |
| AURKA | Aurora | 21 | -0.24036 | 0.052166 | 4.07E-06 | 0.786344 |
| CD4 | sCD4 | 7 | -0.28839 | 0. 111789 | 0.009887 | 0.749469 |
| CD33 | Siglec | 252 | 0.032801 | 0.008334 | 8.29E-05 | 1.033345 |
| ARSB | ARSB | 18 | -0. 11774 | 0.047878 | 0.013928 | 0.888928 |
| CTSC | CATC | 34 | -0. 16014 | 0.039532 | 5. 10E-05 | 0.852027 |
| ENTPD1 | CD39 | 44 | -0. 15706 | 0.031678 | 7. 12E-07 | 0.854652 |
| CRISP3 | CRIS3 | 3 | -0.34311 | 0. 155853 | 0.027702 | 0.709562 |
| TMPRSS15 | Enterokinase | 14 | -0.33309 | 0.077122 | 1.57E-05 | 0.716709 |
| CNDP2 | Glutamate | 32 | -0. 15601 | 0.036563 | 1.98E-05 | 0.855548 |
| IDE | IDE | 8 | -0.25205 | 0.081172 | 0.001902 | 0.777202 |
| KLK12 | kallikrein | 73 | -0.09915 | 0.022122 | 7.39E-06 | 0.905603 |
| KREMEN2 | KREM2 | 8 | -0.2978 | 0.093865 | 0.00151 | 0.742447 |
| LTA4H | LKHA4 | 10 | -0.33141 | 0.088987 | 0.000196 | 0.717913 |
| ASAH2 | ASAH2 | 174 | -0.02638 | 0.012489 | 0.034651 | 0.973963 |
| SFRP1 | SARP | 36 | 0.095732 | 0.031267 | 0.002201 | 1. 100464 |
| CD5L | CD5L | 106 | -0.04969 | 0.018703 | 0.007892 | 0.951526 |
| CNTN5 | Contactin | 49 | -0.07855 | 0.031819 | 0.013569 | 0.92446 |
| CST7 | CYTF | 278 | 0.019918 | 0.00961 | 0.038196 | 1.020118 |
| DLL4 | DLL4 | 17 | 0. 129603 | 0.052737 | 0.013989 | 1. 138376 |
| FCGR2A | FCG2A | 378 | 0.012657 | 0.006398 | 0.047879 | 1.012738 |
| IGFBP7 | IGFBP | 99 | -0.04256 | 0.021172 | 0.044404 | 0.958331 |
| THBS2 | TSP2 | 113 | -0.04274 | 0.016268 | 0.008613 | 0.958165 |
| AURKB | AURKB | 55 | -0. 13694 | 0.026926 | 3.66E-07 | 0.872019 |
| CA6 | Carbonic | 170 | 0.027195 | 0.011641 | 0.019478 | 1.027568 |
| CD207 | CLC4K | 11 | -0.25741 | 0.083426 | 0.002033 | 0.773055 |
| CTSV | Cathepsin | 47 | 0.059451 | 0.02976 | 0.045746 | 1.061254 |
| GZMH | Granzyme | 4 | -0.32416 | 0. 138497 | 0.019255 | 0.723135 |
| HCK | HCK | 9 | -0.4873 | 0. 111025 | 1. 14E-05 | 0.61428 |
| PAK3 | PAK3 | 59 | -0. 11659 | 0.024219 | 1.48E-06 | 0.889946 |
| PAK7 | PAK7 | 25 | -0. 18594 | 0.042649 | 1.30E-05 | 0.830323 |
| PIK3CG | PK3CG | 32 | -0. 16689 | 0.037458 | 8.38E-06 | 0.846295 |
| PLK1 | PLK | 5 | -0.3305 | 0. 122194 | 0.006835 | 0.718561 |

| REN | Renin | 14 | -0. 1724 | 0.064889 | 0.007887 | 0.841641 |
| --- | --- | --- | --- | --- | --- | --- |
| STAB2 | STAB2 | 55 | -0. 14456 | 0.026073 | 2.95E-08 | 0.865404 |
| PTPN2 | TCPTP | 18 | -0.26447 | 0.05957 | 9.01E-06 | 0.767612 |
| TPSG1 | TPSG1 | 3 | -0.43199 | 0. 168346 | 0.010285 | 0.649213 |
| CAMK1D | CAMK1D | 42 | -0. 13252 | 0.031836 | 3. 15E-05 | 0.875882 |
| CMA1 | Chymase | 11 | -0.22851 | 0.066132 | 0.00055 | 0.795719 |
| FLT3 | Flt | 40 | -0. 14583 | 0.031642 | 4.05E-06 | 0.864308 |
| GZMA | granzyme | 150 | -0.06365 | 0.017125 | 0.000202 | 0.938334 |
| CXCL8 | IL | 9 | -0.27896 | 0.092841 | 0.002658 | 0.75657 |
| KLK6 | Kallikrein | 72 | -0. 11469 | 0.021842 | 1.51E-07 | 0.89164 |
| LCK | LCK | 3 | -0.31471 | 0. 134152 | 0.018982 | 0.730003 |
| STK16 | STK16 | 50 | -0. 1452 | 0.028085 | 2.34E-07 | 0.864847 |
| BIRC5 | Survivin | 40 | -0. 15164 | 0.033609 | 6.43E-06 | 0.859298 |
| B2M | 2  b | 68 | 0. 14374 | 0.025711 | 2.26E-08 | 1. 154584 |
| FGF1 | b | 9 | -0.39326 | 0.093279 | 2.49E-05 | 0.674851 |
| CNTF | CNTF | 13 | -0.32055 | 0.073804 | 1.40E-05 | 0.725749 |
| IFNA2 | IFN | 23 | -0. 17606 | 0.045603 | 0.000113 | 0.838564 |
| SERPINA1 | a1 | 128 | -0.03382 | 0.011403 | 0.003022 | 0.966749 |
| BSG | BASI | 8 | -0.32105 | 0. 106217 | 0.002506 | 0.725389 |
| MASP1 | MASP3 | 28 | -0. 13185 | 0.04734 | 0.005349 | 0.876471 |
| DKK3 | DKK3 | 103 | 0.060093 | 0.019445 | 0.001999 | 1.061935 |
| GNS | GNS | 11 | 0. 136939 | 0.059508 | 0.021381 | 1. 146758 |
| IL22RA1 | IL22RA1 | 16 | -0.23553 | 0.063566 | 0.000211 | 0.790148 |
| LY86 | LY86 | 3 | -0.30395 | 0. 129993 | 0.019375 | 0.737895 |
| MMEL1 | MMEL2 | 4 | -0.28237 | 0. 125203 | 0.024113 | 0.753992 |
| CDC42BPB | MRCKB | 10 | -0.29835 | 0.08675 | 0.000583 | 0.742043 |
| MFRP | MFRP | 3 | -0.43493 | 0. 172493 | 0.011689 | 0.647313 |
| TEK | sTie | 71 | 0.045468 | 0.022196 | 0.04052 | 1.046517 |
| CDH2 | Cadherin | 8 | -0.2886 | 0.098234 | 0.003305 | 0.749315 |
| FGFR3 | FGFR | 16 | -0.22798 | 0.05807 | 8.64E-05 | 0.796138 |
| ZAP70 | ZAP70 | 42 | -0. 15875 | 0.030956 | 2.92E-07 | 0.853211 |
| TPO | TMA | 34 | -0. 16911 | 0.037639 | 7.02E-06 | 0.844416 |
| LMNB1 | Lamin | 7 | -0.39432 | 0. 127669 | 0.002011 | 0.674139 |
| HSPA1A | HSP | 24 | -0.23024 | 0.05707 | 5.48E-05 | 0.794344 |
| BPI | BPI | 174 | -0.03019 | 0.013219 | 0.022397 | 0.970266 |
| CCL24 | Eotaxin | 19 | -0.2253 | 0.054502 | 3.57E-05 | 0.798275 |
| CFB | Factor | 157 | -0.03417 | 0.01451 | 0.018515 | 0.966405 |
| FST | FST | 4 | -0.53449 | 0. 182326 | 0.003373 | 0.585968 |
| GZMB | Granzyme | 33 | -0.09654 | 0.037257 | 0.009563 | 0.907972 |
| IL17D | IL | 6 | -0.33922 | 0. 112545 | 0.002577 | 0.712324 |
| XCL1 | Lymphotactin | 7 | -0.29098 | 0.090987 | 0.001384 | 0.747528 |
| PDGFB | PDGF | 5 | 0. 171867 | 0.084853 | 0.04282 | 1. 18752 |
| PLG | Plasmin | 35 | -0. 15726 | 0.036147 | 1.36E-05 | 0.854484 |
| PLG | Plasminogen | 48 | -0.06453 | 0.027803 | 0.020293 | 0.937509 |
| H2AFZ | Histone | 12 | -0.34744 | 0.095613 | 0.000279 | 0.706495 |
| SYNCRIP | HNRPQ | 41 | -0. 13601 | 0.032137 | 2.32E-05 | 0.872836 |
| IGF1R | IGF | 36 | 0.069336 | 0.031304 | 0.026767 | 1.071796 |
| IL1RL1 | IL | 326 | 0.038758 | 0.010114 | 0.000127 | 1.039519 |
| LCMT1 | LCMT1 | 12 | -0. 19987 | 0.063889 | 0.001758 | 0.818839 |
| L1CAM | NCAM | 28 | 0.093717 | 0.042513 | 0.027493 | 1.098249 |
| PFDN5 | PFD5 | 15 | -0.22613 | 0.06617 | 0.000632 | 0.797614 |
| GPI | PHI | 4 | 0.292446 | 0. 133388 | 0.028347 | 1.3397 |
| PSMA2 | PSA2 | 29 | -0. 18905 | 0.040791 | 3.57E-06 | 0.827743 |
| TK1 | Thymidine | 33 | -0. 17713 | 0.04293 | 3.69E-05 | 0.837674 |
| LCORL | transcription | 9 | -0.35297 | 0. 118263 | 0.002839 | 0.702597 |
| CST2 | CYTT | 188 | -0.02553 | 0.012478 | 0.04075 | 0.974793 |
| DYRK3 | DYRK3 | 33 | -0.2012 | 0.037768 | 9.96E-08 | 0.817746 |
| ADAM12 | ADAM12 | 4 | -0.33477 | 0. 144215 | 0.02027 | 0.715505 |

| BCL2L1 | BCL2 | 37 | -0. 17659 | 0.03375 | 1.68E-07 | 0.838126 |
| --- | --- | --- | --- | --- | --- | --- |
| ENTPD3 | ENTP3 | 45 | -0. 14513 | 0.029881 | 1. 19E-06 | 0.864912 |
| FCRL3 | FCRL3 | 155 | 0.026794 | 0.013155 | 0.041665 | 1.027156 |
| SPHK2 | SPHK2 | 15 | -0.33563 | 0.080877 | 3.33E-05 | 0.714884 |
| TPM2 | Tropomyosin | 67 | -0. 11643 | 0.022373 | 1.95E-07 | 0.890089 |
| ZAP70 | ZAP70 | 62 | -0. 12054 | 0.023697 | 3.64E-07 | 0.886442 |
| C3 | C3b | 19 | -0. 16637 | 0.055055 | 0.002512 | 0.846729 |
| MMP12 | MMP | 129 | -0.03875 | 0.01574 | 0.013817 | 0.96199 |
| ADAMTS15 | ATS15 | 3 | -0.36568 | 0. 174952 | 0.036603 | 0.693727 |
| CBX5 | CBX5 | 47 | -0. 14563 | 0.028741 | 4.04E-07 | 0.864474 |
| CLU | Clusterin | 16 | -0. 13479 | 0.065192 | 0.038678 | 0.873899 |
| COL23A1 | CONA1 | 5 | -0.447 | 0. 144351 | 0.001958 | 0.639547 |
| DNAJC19 | DnaJ | 3 | -0.37867 | 0. 166354 | 0.022827 | 0.684768 |
| ADGRG5 | GP114 | 17 | -0.23119 | 0.055323 | 2.93E-05 | 0.793588 |
| HDGFRP2 | HDGR2 | 7 | -0.25698 | 0.099128 | 0.009531 | 0.773384 |
| IL34 | IL | 70 | -0. 1153 | 0.021949 | 1.50E-07 | 0.891098 |
| NXPH1 | NXPH1 | 43 | -0. 11429 | 0.031717 | 0.000314 | 0.891997 |
| PLCG1 | PLCG1 | 26 | -0. 16746 | 0.045091 | 0.000204 | 0.845809 |
| RSPO2 | RSPO2 | 3 | -0.38762 | 0. 172304 | 0.024473 | 0.678672 |
| PPY | PH | 50 | -0.07883 | 0.028275 | 0.005307 | 0.924201 |
| HSD17B1 | 17 | 5 | -0.32687 | 0. 128371 | 0.010888 | 0.72118 |
| APOD | Apo | 47 | -0. 15854 | 0.029863 | 1. 10E-07 | 0.853389 |
| COL8A1 | CO8A1 | 6 | -0.52562 | 0.200253 | 0.008671 | 0.591189 |
| BMPR2 | BMP | 15 | -0.2781 | 0.064503 | 1.62E-05 | 0.757219 |
| VEGFA | VEGF121 | 105 | 0.032233 | 0.01553 | 0.037941 | 1.032758 |
| GDF2 | GDF2 | 22 | -0. 10944 | 0.052277 | 0.036307 | 0.896336 |
| GSTP1 | Glutathione | 9 | -0. 17334 | 0.071282 | 0.015024 | 0.840849 |
| CCL19 | MIP | 59 | 0.04561 | 0.022646 | 0.044008 | 1.046666 |
| AMH | MIS | 92 | 0.047622 | 0.020707 | 0.021458 | 1.048774 |
| F3 | TF | 11 | -0.26891 | 0.08756 | 0.002133 | 0.764214 |
| AGR2 | AGR2 | 14 | -0.2312 | 0.065418 | 0.000409 | 0.793578 |
| CDNF | ARMEL | 43 | 0.067084 | 0.027596 | 0.01506 | 1.069386 |
| ATP5B | ATP | 36 | -0. 15655 | 0.034799 | 6.84E-06 | 0.85509 |
| C1QBP | C1QBP | 17 | -0. 14594 | 0.062663 | 0.019859 | 0.864208 |
| FCAR | FCAR | 7 | -0.32036 | 0. 111062 | 0.00392 | 0.725885 |
| GP1BA | GP1BA | 54 | -0.07 | 0.030868 | 0.023345 | 0.932394 |
| HPGD | HPG | 11 | 0. 14054 | 0.050331 | 0.005233 | 1. 150895 |
| MAPK11 | MK11 | 4 | -0.57155 | 0. 183233 | 0.001813 | 0.564649 |
| MAPK12 | MK12 | 22 | 0. 14496 | 0.040941 | 0.000399 | 1. 155994 |
| MAPK13 | MK13 | 7 | -0. 19045 | 0.077851 | 0.014432 | 0.826587 |
| SOD2 | Mn | 84 | -0.0558 | 0.023945 | 0.019797 | 0.945732 |
| CLIC1 | NCC27 | 5 | -0.30982 | 0. 128896 | 0.016231 | 0.733576 |
| PRDX5 | Peroxiredoxin | 3 | -0.36411 | 0. 144232 | 0.011588 | 0.694817 |
| UCHL1 | PGP9 | 34 | 0.066663 | 0.026243 | 0.01108 | 1.068935 |
| RB1 | Rb | 32 | -0. 15591 | 0.041622 | 0.00018 | 0.855635 |
| RPS3 | RS3 | 5 | 0.086551 | 0.041593 | 0.037446 | 1.090407 |
| SPTAN1 | SPTA2 | 6 | -0.2788 | 0. 120148 | 0.020316 | 0.756692 |
| IL1RAPL2 | IL | 6 | -0.34707 | 0. 117144 | 0.003049 | 0.706759 |
| IL7R | IL | 8 | -0.22807 | 0. 105279 | 0.030288 | 0.796071 |
| JAG1 | JAG1 | 14 | 0. 137336 | 0.051231 | 0.007346 | 1. 147213 |
| KLRF1 | KLRF1 | 8 | -0.26686 | 0. 103091 | 0.009637 | 0.765779 |
| MICB | MICB | 345 | -0.03143 | 0.005724 | 3.99E-08 | 0.969056 |
| NOTCH2 | NOTC2 | 6 | -0.44595 | 0. 159717 | 0.005236 | 0.640216 |
| NRXN3 | NRX3B | 43 | -0.0666 | 0.033009 | 0.04362 | 0.935566 |
| PRLR | Prolactin | 13 | -0.21324 | 0.070018 | 0.002324 | 0.807966 |
| ICAM5 | sICAM | 180 | 0.02236 | 0.010923 | 0.040655 | 1.022612 |
| TGFBR2 | TGF | 9 | -0.23041 | 0.071515 | 0.001274 | 0.79421 |
| UNC5C | UNC5H3 | 29 | 0.077549 | 0.034985 | 0.026649 | 1.080635 |

| PDE7A | PDE7A | 7 | -0.28716 | 0. 109229 | 0.008564 | 0.750391 |
| --- | --- | --- | --- | --- | --- | --- |
| GCKR | GCKR | 15 | -0.21169 | 0.07357 | 0.00401 | 0.809218 |
| PDE2A | cGMP | 23 | -0.21156 | 0.051886 | 4.56E-05 | 0.809322 |
| STK17B | DRAK2 | 10 | -0.30645 | 0.077256 | 7.29E-05 | 0.736059 |
| PDE4D | PDE4D | 19 | -0.30393 | 0.061518 | 7.79E-07 | 0.737913 |
| ABL2 | ABL2 | 13 | -0.29989 | 0.073786 | 4.82E-05 | 0.7409 |
| BCAR3 | BCAR3 | 6 | -0.25015 | 0. 121916 | 0.040187 | 0.778684 |
| GRAP2 | GRB2 | 3 | -0.68312 | 0.222498 | 0.002139 | 0.505039 |
| MMP16 | MMP | 7 | -0.4309 | 0. 12338 | 0.000479 | 0.649924 |
| TNNT2 | Troponin | 19 | -0. 16079 | 0.06368 | 0.011571 | 0.851471 |
| CPE | CBPE | 33 | -0. 15025 | 0.037898 | 7.35E-05 | 0.86049 |
| CPNE1 | CPNE1 | 213 | -0.02502 | 0.010534 | 0.017522 | 0.975287 |
| CCNB1 | Cyclin | 13 | -0.33617 | 0.073174 | 4.35E-06 | 0.714499 |
| GPC6 | GPC6 | 19 | 0.078933 | 0.031674 | 0.012702 | 1.082132 |
| TNFRSF14 | HVEM | 4 | -0.28601 | 0. 116209 | 0.013849 | 0.751257 |
| OMD | OMD | 47 | 0.099186 | 0.033814 | 0.003354 | 1. 104272 |
| SEMA3E | Semaphorin | 426 | 0.017966 | 0.007125 | 0.01168 | 1.018128 |
| CDH15 | CAD15 | 7 | -0.36542 | 0.093926 | 0.0001 | 0.693904 |
| COLEC12 | COLEC12 | 100 | -0.05319 | 0.018904 | 0.004899 | 0.948202 |
| CST1 | CYTN | 161 | -0.03053 | 0.01441 | 0.034121 | 0.969933 |
| FCN3 | Ficolin | 106 | 0.039594 | 0.017932 | 0.02724 | 1.040388 |
| IL17RC | IL | 8 | -0.38478 | 0. 128289 | 0.002706 | 0.6806 |
| PRKCG | PKC | 14 | -0. 19254 | 0.083039 | 0.020415 | 0.824863 |
| SNRPF | RUXF | 26 | -0.09165 | 0.039665 | 0.020857 | 0.912427 |
| TNFRSF18 | GITR | 24 | -0.20146 | 0.05094 | 7.66E-05 | 0.817537 |
| ZPLD1 | ZPLD1 | 7 | -0.3353 | 0. 134899 | 0.012936 | 0.715126 |
| RNASE10 | RNS10 | 10 | -0.26641 | 0.083697 | 0.001457 | 0.766123 |
| MFAP1 | MFAP1 | 3 | -0.34269 | 0. 166417 | 0.03947 | 0.709855 |
| FAM171A1 | CJ038 | 9 | -0.29589 | 0.089983 | 0.001008 | 0.74387 |
| DEFB108B | D108B | 3 | -0.47703 | 0. 185644 | 0.010182 | 0.620624 |
| HINT2 | HINT2 | 6 | -0.32019 | 0. 110989 | 0.003916 | 0.726012 |
| CRH | CRH | 3 | -0.39008 | 0. 167726 | 0.020034 | 0.677001 |
| PAM | AMD | 387 | 0.016301 | 0.007536 | 0.03053 | 1.016435 |
| CD300LF | CLM1 | 6 | -0.40361 | 0. 176338 | 0.022088 | 0.667904 |
| SEMA3G | SEM3G | 80 | -0.06991 | 0.024979 | 0.00513 | 0.932477 |
| KLRC1 | NKG2A | 3 | -0.72106 | 0.279222 | 0.009812 | 0.486238 |
| CRTAC1 | CRAC1 | 145 | -0.02838 | 0.013459 | 0.034999 | 0.972022 |
| NETO1 | NETO1 | 13 | -0.29194 | 0.082444 | 0.000399 | 0.746813 |
| LCN8 | LCN8 | 6 | -0.27051 | 0. 122241 | 0.026903 | 0.76299 |
| CTRB2 | CTRB2 | 347 | 0.018102 | 0.007486 | 0.015608 | 1.018267 |
| DEFB106A | D106A | 19 | -0.25125 | 0.064568 | 9.97E-05 | 0.777825 |
| SEMA3B | SEM3B | 12 | -0.32316 | 0.079849 | 5. 18E-05 | 0.723856 |
| CTRB1 | Chymotrypsin | 77 | -0.0531 | 0.021174 | 0.012151 | 0.948288 |
| OBP2B | OBP2B | 174 | -0.02564 | 0.011954 | 0.031987 | 0.97469 |
| TNXB | Tenascin | 316 | -0.02241 | 0.00676 | 0.000917 | 0.977842 |
| OLFM1 | NOE1 | 18 | 0. 106551 | 0.050575 | 0.035137 | 1. 112434 |
| GZMM | Granzyme | 7 | -0.20785 | 0.095533 | 0.029578 | 0.812329 |
| LEAP2 | LEAP2 | 45 | -0.0671 | 0.0299 | 0.024814 | 0.935099 |
| IFNL3 | IFN | 20 | 0. 166682 | 0.072676 | 0.021819 | 1. 181379 |
| IFNA6 | IFNA6 | 10 | -0.28363 | 0.09113 | 0.001856 | 0.753043 |
| CSAG1 | CSAG1 | 39 | -0.07073 | 0.027867 | 0.011143 | 0.931712 |
| INSL3 | INSL3 | 36 | -0. 1543 | 0.03827 | 5.53E-05 | 0.857014 |
| SBSN | SBSN | 10 | -0.35019 | 0. 103187 | 0.000689 | 0.704554 |
| SPAG11A | SG11A | 30 | -0. 15465 | 0.048893 | 0.001562 | 0.856718 |
| SEMA4D | SEM4D | 130 | 0.027922 | 0.012569 | 0.02632 | 1.028315 |
| ACP6 | PPA6 | 400 | -0.01919 | 0.007678 | 0.012466 | 0.980998 |
| PI15 | PI15 | 36 | -0. 13769 | 0.034654 | 7.08E-05 | 0.871365 |
| CLPS | COL | 184 | -0.029 | 0.01289 | 0.024486 | 0.97142 |

| FAM19A1 | F19A1 | 18 | -0.20419 | 0.057549 | 0.000388 | 0.815304 |
| --- | --- | --- | --- | --- | --- | --- |
| INSL6 | INSL6 | 9 | -0.34942 | 0. 115432 | 0.002469 | 0.705094 |
| PAPPA2 | PAPP2 | 6 | -0.30512 | 0. 12472 | 0.014426 | 0.737032 |
| GNAS | GNAS3 | 4 | -0.44225 | 0. 166067 | 0.007743 | 0.642589 |
| KLK9 | kallikrein | 9 | -0.23354 | 0. 100994 | 0.020756 | 0.791728 |
| CD70 | CD70 | 11 | -0.31237 | 0.078994 | 7.67E-05 | 0.731709 |
| EHMT2 | NG36 | 33 | -0. 11882 | 0.032453 | 0.000251 | 0.88797 |
| C21orf33 | ES1 | 34 | -0. 18528 | 0.037821 | 9.64E-07 | 0.830873 |
| TNFSF14 | LIGHT | 34 | -0. 16837 | 0.038181 | 1.03E-05 | 0.845043 |
| UTS2 | Urotensin | 64 | -0. 11224 | 0.023116 | 1.20E-06 | 0.893829 |
| RLN3 | REL3 | 4 | -0.23386 | 0. 118219 | 0.047909 | 0.791475 |
| NXPH3 | NXPH3 | 23 | -0. 16645 | 0.060969 | 0.006332 | 0.846664 |
| ACPL2 | ACPL2 | 26 | -0. 1574 | 0.046113 | 0.000642 | 0.85436 |
| PCOLCE2 | PCOC2 | 122 | -0.03873 | 0.017428 | 0.026276 | 0.962012 |
| MAMDC2 | MAMC2 | 6 | -0.3738 | 0. 170381 | 0.028243 | 0.688116 |
| TP53 | p53 | 11 | 0. 186821 | 0.071315 | 0.008802 | 1.205411 |
| MAP2K3 | MP2K3 | 5 | -0.37004 | 0. 154261 | 0.016448 | 0.690705 |
| TP53 | p53 | 60 | -0.08208 | 0.028106 | 0.003494 | 0.921194 |
| IFNA5 | IFNA5 | 34 | -0. 16722 | 0.036301 | 4. 10E-06 | 0.846013 |
| PDZD11 | PDZ11 | 4 | -0.34108 | 0. 143038 | 0.017099 | 0.711 |
| RSPO1 | RSPO1 | 4 | -0.3543 | 0. 148724 | 0.017207 | 0.701667 |
| PVRL2 | Nectin | 27 | -0.20301 | 0.048227 | 2.56E-05 | 0.816267 |
| LEPRE1 | P3H1 | 17 | -0.22473 | 0.055196 | 4.67E-05 | 0.798732 |
| MCEMP1 | MCEM1 | 47 | -0. 13153 | 0.028253 | 3.23E-06 | 0.876754 |
| ARHGAP36 | RHG36 | 11 | -0.28916 | 0.091208 | 0.001522 | 0.748889 |
| DNASE1L2 | DNSL2 | 23 | -0. 17644 | 0.071244 | 0.013266 | 0.838251 |
| CD79B | CD79B | 9 | -0.38722 | 0. 103216 | 0.000176 | 0.678942 |
| HEPHL1 | HPHL1 | 32 | -0.20079 | 0.04311 | 3.20E-06 | 0.818085 |
| CELA3B | ELA3B | 8 | -0.339 | 0. 105872 | 0.001365 | 0.712486 |
| DEFB128 | DB128 | 24 | -0. 19788 | 0.054627 | 0.000292 | 0.820466 |
| C2orf40 | AUGN | 54 | -0. 13669 | 0.029302 | 3.09E-06 | 0.872243 |
| TXNDC15 | TXD15 | 178 | 0.029158 | 0.012679 | 0.021465 | 1.029588 |
| DEAF1 | DEAF1 | 15 | -0. 18869 | 0.078874 | 0.016745 | 0.828046 |
| SEMG2 | SEMG2 | 94 | -0.04521 | 0.015957 | 0.00461 | 0.955798 |
| MANBA | MANBA | 107 | 0.06771 | 0.017357 | 9.58E-05 | 1.070055 |
| VWA1 | VWA1 | 47 | -0.07693 | 0.02236 | 0.000581 | 0.925954 |
| CCDC126 | CC126 | 78 | -0.06451 | 0.020419 | 0.001582 | 0.937528 |
| GPHA2 | GPHA2 | 41 | -0. 14028 | 0.033972 | 3.64E-05 | 0.869117 |
| DEFB107A | D107A | 7 | -0.30888 | 0. 122275 | 0.011533 | 0.73427 |
| PSG2 | PSG2 | 18 | -0.20695 | 0.055597 | 0.000197 | 0.813061 |
| DEFB135 | DB135 | 33 | -0. 19656 | 0.041071 | 1.70E-06 | 0.82155 |
| IFNA16 | IFN16 | 5 | -0.55331 | 0. 137649 | 5.83E-05 | 0.575041 |
| FAM19A2 | F19A2 | 8 | -0.42844 | 0. 13622 | 0.00166 | 0.651524 |
| PCYOX1 | PCYOX | 143 | 0.033494 | 0.013375 | 0.012272 | 1.034061 |
| PTX3 | PTX3 | 31 | -0. 18352 | 0.039243 | 2.92E-06 | 0.832333 |
| ARHGDIA | Rho | 5 | -0.26719 | 0. 104199 | 0.01034 | 0.765526 |
| PSG6 | PSG6 | 7 | -0.43698 | 0. 14599 | 0.002761 | 0.645988 |
| RPN1 | RPN1 | 232 | 0.024869 | 0.009077 | 0.006151 | 1.025181 |
| APOC3 | Apo | 69 | -0.06828 | 0.027003 | 0.011449 | 0.933997 |
| QRFP | OX26 | 22 | -0. 19939 | 0.047066 | 2.27E-05 | 0.81923 |
| TAC4 | TKN4 | 36 | -0. 15555 | 0.036497 | 2.02E-05 | 0.855941 |
| LY6G6D | LY66D | 7 | -0.33998 | 0. 113077 | 0.002642 | 0.711785 |
| BPIFA1 | PLUNC | 25 | -0. 19583 | 0.04564 | 1.78E-05 | 0.822153 |
| CANT1 | CANT1 | 41 | -0. 15162 | 0.037956 | 6.48E-05 | 0.859316 |
| CPZ | CBPZ | 5 | -0.33318 | 0. 111186 | 0.00273 | 0.716644 |
| DLK1 | DLK1 | 86 | -0.04065 | 0.016454 | 0.013503 | 0.960169 |
| RS1 | XLRS1 | 7 | -0.31338 | 0. 1099 | 0.004352 | 0.730974 |
| RNF128 | RN128 | 25 | -0.22732 | 0.043557 | 1.80E-07 | 0.796667 |

| FAM19A4 | F19A4 | 6 | -0.28193 | 0. 127225 | 0.026691 | 0.754324 |
| --- | --- | --- | --- | --- | --- | --- |
| GDF10 | BMP | 5 | -0.3004 | 0. 109907 | 0.006272 | 0.740522 |
| TRIL | TRIL | 52 | -0. 12756 | 0.028278 | 6.45E-06 | 0.880238 |
| EXTL2 | EXTL2 | 30 | -0. 1666 | 0.040993 | 4.82E-05 | 0.846539 |
| DNASE2B | DNS2B | 4 | -0.29964 | 0. 142741 | 0.0358 | 0.741084 |
| PLBD2 | LAML2 | 16 | -0.26618 | 0.063723 | 2.95E-05 | 0.766302 |
| PRLH | PRRP | 11 | -0.33339 | 0.089754 | 0.000204 | 0.716492 |
| NELL1 | NELL1 | 158 | 0.04783 | 0.012338 | 0.000106 | 1.048992 |
| PRNP | PRIO | 17 | -0.21664 | 0.053766 | 5.60E-05 | 0.80522 |
| VSTM2L | VTM2L | 8 | -0.44275 | 0. 128198 | 0.000553 | 0.64227 |
| SERPINA12 | Vaspin | 133 | -0.03519 | 0.01437 | 0.01433 | 0.965421 |
| CFAP45 | CCD19 | 5 | -0.38622 | 0. 136809 | 0.004756 | 0.679618 |
| STOML2 | Stomatin | 49 | 0.070394 | 0.027235 | 0.009747 | 1.072931 |
| COLEC10 | COL10 | 43 | -0. 14232 | 0.032858 | 1.48E-05 | 0.867344 |
| TNMD | TNMD | 21 | -0.24824 | 0.064078 | 0.000107 | 0.78017 |
| LRFN5 | LRFN5 | 43 | -0. 14868 | 0.031179 | 1.86E-06 | 0.861844 |
| SAYSD1 | SMDC1 | 13 | -0.27817 | 0.06934 | 6.03E-05 | 0.757168 |
| FAM174A | TM157 | 48 | -0.0525 | 0.024162 | 0.029793 | 0.948854 |
| APCDD1 | APCD1 | 15 | -0.37062 | 0.071226 | 1.96E-07 | 0.690305 |
| RELL2 | RELL2 | 11 | -0. 18547 | 0.069316 | 0.007457 | 0.830714 |
| NDNF | CD031 | 17 | -0.26268 | 0.063107 | 3. 15E-05 | 0.76899 |
| KDELC1 | KDEL1 | 22 | -0.23449 | 0.050715 | 3.77E-06 | 0.790976 |
| FCRL6 | FCRL6 | 42 | -0. 15004 | 0.036513 | 3.97E-05 | 0.86067 |
| LINGO1 | LIGO1 | 26 | -0. 11854 | 0.048606 | 0.014735 | 0.888215 |
| RLN2 | REL2 | 34 | -0.21022 | 0.036646 | 9.66E-09 | 0.810404 |
| WNT11 | WNT11 | 15 | -0.2222 | 0.062163 | 0.000351 | 0.800752 |
| UPK3BL | UPK3L | 56 | -0. 12472 | 0.024905 | 5.50E-07 | 0.882741 |
| LRP11 | LRP11 | 302 | -0.02685 | 0.009331 | 0.004004 | 0.973503 |
| TFRC | TR | 25 | -0. 19543 | 0.055384 | 0.000418 | 0.822485 |
| C1orf162 | CA162 | 37 | -0.07227 | 0.033769 | 0.03235 | 0.930282 |
| CD164L2 | C16L2 | 31 | -0. 16628 | 0.039626 | 2.71E-05 | 0.846811 |
| HBZ | HBAZ | 130 | 0.03533 | 0.011982 | 0.003194 | 1.035961 |
| B4GALT3 | B4GT3 | 10 | -0.2906 | 0.085953 | 0.000722 | 0.747811 |
| ST8SIA6 | SIA8F | 5 | -0.29667 | 0. 121257 | 0.014421 | 0.74329 |
| ITGA5 | ITA5 | 35 | -0. 1432 | 0.035043 | 4.38E-05 | 0.866585 |
| PMEPA1 | PMEPA | 9 | -0.35815 | 0.087654 | 4.39E-05 | 0.698968 |
| ASIC4 | ASIC4 | 11 | -0.30526 | 0.084721 | 0.000314 | 0.736933 |
| IGFL3 | IGFL3 | 60 | -0. 11674 | 0.024032 | 1. 19E-06 | 0.889815 |
| CNTNAP2 | CNTP2 | 109 | 0.051285 | 0.016355 | 0.001715 | 1.052622 |
| STX1B | STX1B | 13 | -0.21562 | 0.079276 | 0.006531 | 0.806041 |
| WFDC5 | WFDC5 | 31 | -0.20137 | 0.040507 | 6.66E-07 | 0.817613 |
| SNAPIN | SNAPN | 15 | -0.33267 | 0.066953 | 6.74E-07 | 0.71701 |
| HS3ST3B1 | HS3SB | 29 | -0.21148 | 0.046985 | 6.77E-06 | 0.809387 |
| HBD | HBD | 48 | -0. 13759 | 0.029071 | 2.21E-06 | 0.871456 |
| C3orf18 | CC018 | 47 | -0. 12634 | 0.027545 | 4.50E-06 | 0.881317 |
| RAB26 | RAB26 | 97 | -0.06124 | 0.020742 | 0.00315 | 0.940593 |
| COL25A1 | COPA1 | 9 | -0.28002 | 0.087014 | 0.001291 | 0.755772 |
| KCNIP4 | KCIP4 | 7 | -0.32987 | 0. 101518 | 0.001157 | 0.719015 |
| TSR3 | TSR3 | 38 | -0. 16713 | 0.036032 | 3.51E-06 | 0.846087 |
| C20orf173 | CT173 | 72 | -0.07844 | 0.024248 | 0.001216 | 0.924553 |
| CEACAM19 | CEA19 | 28 | -0. 17316 | 0.04453 | 0.000101 | 0.841003 |
| CLEC2D | CLC2D | 20 | -0.24237 | 0.051652 | 2.70E-06 | 0.784769 |
| LILRA6 | LIRA6 | 304 | -0.02197 | 0.00737 | 0.00287 | 0.978266 |
| ERO1L | ERO1A | 17 | -0.28593 | 0.072659 | 8.31E-05 | 0.751317 |
| VAMP8 | VAMP8 | 24 | -0.26326 | 0.050592 | 1.95E-07 | 0.768539 |
| ECEL1 | ECEL1 | 6 | -0.33495 | 0. 104552 | 0.001357 | 0.715375 |
| BTN3A1 | BT3A1 | 17 | -0.23063 | 0.059918 | 0.000119 | 0.794031 |
| B3GNT6 | B3GN6 | 24 | -0.20612 | 0.047311 | 1.32E-05 | 0.813736 |

| PDILT | PDILT | 14 | -0.42324 | 0.075927 | 2.49E-08 | 0.654924 |
| --- | --- | --- | --- | --- | --- | --- |
| RMDN1 | RMD1 | 51 | 0.073204 | 0.030299 | 0.015689 | 1.07595 |
| CABP7 | CABP7 | 26 | -0. 17837 | 0.045989 | 0.000105 | 0.836636 |
| SMIM24 | CS077 | 7 | -0.2552 | 0. 111541 | 0.022142 | 0.774762 |
| OSCAR | OSCAR | 4 | -0.34409 | 0. 133263 | 0.009822 | 0.708865 |
| SERPINI2 | SPI2 | 14 | -0.25423 | 0.062649 | 4.95E-05 | 0.775511 |
| SYT7 | SYT7 | 7 | -0.33001 | 0. 126992 | 0.009358 | 0.718914 |
| MRPL52 | RM52 | 9 | -0.32513 | 0.086964 | 0.000185 | 0.722434 |
| IL21 | IL | 73 | -0.05893 | 0.025361 | 0.020136 | 0.942769 |
| C1QL4 | C1QL4 | 11 | -0.39434 | 0. 107587 | 0.000247 | 0.674124 |
| CPN1 | CBPN | 23 | -0.22192 | 0.048653 | 5.08E-06 | 0.800977 |
| ITIH3 | ITIH3 | 238 | 0.022497 | 0.011397 | 0.048391 | 1.022752 |
| PDIA4 | PDIA4 | 12 | -0.26057 | 0.088214 | 0.003138 | 0.77061 |
| NGRN | NGRN | 7 | -0.35461 | 0. 122928 | 0.003918 | 0.701447 |
| FUT10 | FUT10 | 338 | -0.03904 | 0.009248 | 2.43E-05 | 0.961713 |
| IFNA14 | IFN14 | 5 | -0.35777 | 0. 137511 | 0.009274 | 0.699231 |
| C19orf80 | TD26 | 3 | -0.57991 | 0. 172315 | 0.000764 | 0.559948 |
| CEACAM7 | CEAM7 | 58 | -0.05614 | 0.027196 | 0.039004 | 0.945411 |
| CHST3 | CHST3 | 14 | -0.43819 | 0.08541 | 2.89E-07 | 0.645204 |
| SYN3 | SYN3 | 10 | -0.33155 | 0.084299 | 8.39E-05 | 0.717812 |
| RFNG | RFNG | 13 | -0.33695 | 0.076319 | 1.01E-05 | 0.713948 |
| CKAP4 | CKAP4 | 20 | -0.26868 | 0.055715 | 1.42E-06 | 0.764391 |
| S100A13 | S100A13 | 295 | -0.01844 | 0.007594 | 0.015159 | 0.981726 |
| MMGT1 | MMGT1 | 12 | -0.35738 | 0.096374 | 0.000209 | 0.699508 |
| T6GALNAC | SIA7F | 8 | -0.33309 | 0.087594 | 0.000143 | 0.716706 |
| TMPRSS11A | TM11A | 12 | -0.34537 | 0.084095 | 4.01E-05 | 0.707962 |
| P2RX6 | P2RX6 | 8 | -0.29083 | 0.096714 | 0.002638 | 0.747645 |
| COLGALT2 | GT252 | 4 | -0.29764 | 0. 127645 | 0.019714 | 0.742571 |
| VSTM4 | CJ072 | 39 | -0. 14927 | 0.031315 | 1.87E-06 | 0.861336 |
| IGFLR1 | TM149 | 81 | 0.0532 | 0.020602 | 0.009814 | 1.05464 |
| FREM2 | FREM2 | 11 | -0.28456 | 0.077812 | 0.000255 | 0.752346 |
| GORAB | GORAB | 21 | -0.26991 | 0.054755 | 8.25E-07 | 0.763445 |
| BCL2L10 | B2L10 | 16 | -0.26839 | 0.060588 | 9.44E-06 | 0.764612 |
| PTH2 | TIP39 | 12 | -0.35531 | 0.087274 | 4.68E-05 | 0.700956 |
| SERPINA9 | SPA9 | 33 | -0.07238 | 0.032682 | 0.026773 | 0.930173 |
| SPTLC2 | LCB2 | 25 | -0.24864 | 0.048261 | 2.58E-07 | 0.779859 |
| FATE1 | FATE1 | 5 | -0.29458 | 0. 144351 | 0.041278 | 0.744844 |
| RNF148 | RN148 | 7 | -0.31318 | 0. 11135 | 0.004915 | 0.731121 |
| CISD1 | ZCD1 | 14 | -0.29786 | 0.075984 | 8.86E-05 | 0.742407 |
| NDUFB11 | NDUBB | 30 | -0. 17574 | 0.046756 | 0.000171 | 0.838837 |
| NDUFV2 | NDUV2 | 4 | -0.43435 | 0. 194737 | 0.025718 | 0.647685 |
| SFRP2 | SARP | 45 | -0. 14343 | 0.029994 | 1.74E-06 | 0.86638 |
| CLEC4D | CLC4D | 36 | -0. 13068 | 0.036243 | 0.000311 | 0.877497 |
| ITGB5 | ITB5 | 17 | -0.27386 | 0.059641 | 4.39E-06 | 0.76044 |
| HLA | DQA2 | 92 | -0.09866 | 0.017952 | 3.89E-08 | 0.90605 |
| SNN | SNN | 16 | -0. 19989 | 0.05916 | 0.000728 | 0.818819 |
| CDH11 | Cadherin | 42 | -0. 14292 | 0.031724 | 6.64E-06 | 0.866825 |
| ITM2A | ITM2A | 26 | -0. 19907 | 0.052282 | 0.00014 | 0.819489 |
| ZP4 | ZP4 | 14 | -0.23493 | 0.069484 | 0.000722 | 0.790625 |
| CLPSL2 | CF126 | 20 | -0.2015 | 0.05398 | 0.000189 | 0.817506 |
| KIR2DL2 | KI2L2 | 16 | -0. 17992 | 0.056467 | 0.001441 | 0.835336 |
| UNC5B | UNC5B | 28 | 0.090797 | 0.035274 | 0.010052 | 1.095047 |
| C9orf89 | BINCA | 12 | -0.27327 | 0.086539 | 0.00159 | 0.760889 |
| CLEC2B | CLC2B | 4 | -0.44493 | 0.226027 | 0.049014 | 0.640871 |
| CCDC90B | CC90B | 9 | -0.38906 | 0.093472 | 3. 15E-05 | 0.677694 |
| KLRC3 | NKG2E | 98 | -0.03727 | 0.018308 | 0.041792 | 0.963419 |
| CCDC167 | CC167 | 20 | -0.27962 | 0.059193 | 2.31E-06 | 0.75607 |
| GOSR1 | GOS | 37 | -0. 15403 | 0.038357 | 5.93E-05 | 0.857245 |

| IGFBPL1 | IBPL1 | 8 | -0.29066 | 0. 100153 | 0.003705 | 0.747767 |
| --- | --- | --- | --- | --- | --- | --- |
| GBP6 | GBP6 | 53 | -0. 1225 | 0.026489 | 3.75E-06 | 0.884703 |
| C1D | C1D | 11 | -0.26117 | 0.072813 | 0.000335 | 0.770147 |
| T6GALNAC | SIA7B | 61 | -0. 12499 | 0.023809 | 1.52E-07 | 0.882505 |
| ABHD12 | ABD12 | 5 | -0.40177 | 0. 14705 | 0.006291 | 0.669132 |
| SMR3A | SMR3A | 7 | -0.30233 | 0.090745 | 0.000863 | 0.739095 |
| SERF1A | SERF1 | 17 | -0.30777 | 0.065271 | 2.41E-06 | 0.735083 |
| PSG11 | PSG11 | 33 | -0. 17341 | 0.04221 | 3.99E-05 | 0.840793 |
| COX4I2 | COX42 | 63 | -0. 11578 | 0.024984 | 3.58E-06 | 0.890672 |
| ANKRD46 | ANR46 | 11 | -0.45442 | 0. 103599 | 1. 15E-05 | 0.634819 |
| NCR3LG1 | NR3L1 | 18 | -0.23095 | 0.067814 | 0.00066 | 0.793777 |
| HERC4 | HERC4 | 28 | -0. 19521 | 0.048866 | 6.48E-05 | 0.822664 |
| SIGLEC8 | SIGL8 | 34 | -0.09517 | 0.041392 | 0.021487 | 0.909217 |
| T6GALNAC | SIA7A | 29 | -0. 17386 | 0.041528 | 2.83E-05 | 0.840417 |
| TSSK2 | TSSK2 | 3 | -0.34049 | 0. 157983 | 0.031145 | 0.711424 |
| SEC61B | SC61B | 7 | -0.32677 | 0. 121121 | 0.006978 | 0.721249 |
| CYP3A4 | Cytochrome | 37 | -0. 14095 | 0.035997 | 9.01E-05 | 0.86853 |
| PSMA1 | PSA1 | 43 | -0. 12344 | 0.034759 | 0.000383 | 0.883871 |
| PARP16 | PAR16 | 15 | -0.23709 | 0.072879 | 0.001141 | 0.78892 |
| SPTLC1 | SPTC1 | 4 | 0.312493 | 0. 106314 | 0.003289 | 1.366829 |
| COA3 | CCD56 | 40 | -0. 1544 | 0.032633 | 2.23E-06 | 0.856928 |
| MRAP | MRAP | 15 | -0.31982 | 0.06809 | 2.64E-06 | 0.72628 |
| VAMP3 | VAMP3 | 6 | -0.32061 | 0. 129973 | 0.013635 | 0.725708 |
| LRFN1 | LRFN1 | 35 | -0. 15056 | 0.034651 | 1.39E-05 | 0.860222 |
| SCN4B | SCN4B | 38 | -0. 17814 | 0.034285 | 2.04E-07 | 0.836824 |
| CPD | CBPD | 15 | -0.20162 | 0.060475 | 0.000856 | 0.817404 |
| ST8SIA2 | SIA8B | 6 | -0.44282 | 0. 172107 | 0.010083 | 0.642221 |
| FJX1 | FJX1 | 53 | 0.069825 | 0.024712 | 0.004719 | 1.072321 |
| ADM | Adrenomedullin | 9 | -0.42509 | 0. 122292 | 0.000509 | 0.653711 |
| TPST1 | TPST1 | 84 | -0.05482 | 0.0202 | 0.006645 | 0.946651 |
| EXOSC1 | EXOS1 | 7 | -0.30445 | 0. 111451 | 0.006301 | 0.737529 |
| SYT8 | SYT8 | 9 | -0.32718 | 0.088069 | 0.000203 | 0.720953 |
| NDRG4 | NDRG4 | 26 | -0. 18316 | 0.052324 | 0.000464 | 0.832636 |
| PQLC2L | CC055 | 5 | -0.2957 | 0. 139661 | 0.034237 | 0.744012 |
| CDH7 | CADH7 | 114 | 0.062763 | 0.019219 | 0.001092 | 1.064775 |
| POTEG | POTEG | 9 | -0.30993 | 0.09737 | 0.001458 | 0.7335 |
| POTEM | POTEM | 4 | -0.41075 | 0. 157954 | 0.00931 | 0.663151 |
| FRRS1L | FRS1L | 3 | -0.38959 | 0. 173301 | 0.024573 | 0.677336 |
| PCDHGC5 | PCDGM | 5 | -0.50599 | 0. 173085 | 0.003463 | 0.602906 |
| NAALAD2 | NALD2 | 98 | -0.04235 | 0.017287 | 0.014295 | 0.958535 |
| IQCF1 | IQCF1 | 26 | -0. 16998 | 0.049745 | 0.000633 | 0.843679 |
| ENTPD1 | CD39 | 40 | -0. 11374 | 0.04153 | 0.006169 | 0.892493 |
| TMPRSS5 | Spinesin | 13 | -0.30558 | 0.080588 | 0.00015 | 0.736696 |
| HRK | HRK | 15 | -0.28841 | 0.068373 | 2.46E-05 | 0.749457 |
| MANEA | MANEA | 449 | 0.015204 | 0.007465 | 0.041677 | 1.01532 |
| DNAJC4 | DNJC4 | 16 | -0.30242 | 0.067767 | 8. 10E-06 | 0.739031 |
| FOXRED1 | FXRD1 | 28 | -0. 15862 | 0.044895 | 0.000411 | 0.853322 |
| VSIG2 | VSIG2 | 42 | -0.05748 | 0.023834 | 0.015874 | 0.944138 |
| FSHB | FSHB | 8 | -0.27074 | 0. 107987 | 0.012171 | 0.762814 |
| KIR3DL3 | KI3L3 | 8 | -0.23765 | 0. 105776 | 0.024658 | 0.78848 |
| LGALS1 | Galectin | 4 | 0.24898 | 0. 102245 | 0.014887 | 1.282716 |
| FTMT | FTMT | 290 | -0.04184 | 0.007483 | 2.26E-08 | 0.959027 |
| THPO | Tpo | 15 | -0. 16326 | 0.081498 | 0.045159 | 0.849374 |
| EVA1B | F176B | 13 | -0.29515 | 0.070191 | 2.61E-05 | 0.744422 |
| PATE4 | PATE4 | 6 | -0. 18998 | 0.093084 | 0.04126 | 0.826979 |
| SYT9 | SYT9 | 8 | -0.23968 | 0. 10258 | 0.019463 | 0.786878 |
| KCNE3 | KCNE3 | 13 | -0.31989 | 0.086924 | 0.000233 | 0.726228 |
| KIAA1161 | K1161 | 13 | -0.20113 | 0.06004 | 0.000808 | 0.817802 |

| CD3E | CD3E | 81 | 0.057815 | 0.023998 | 0.015991 | 1.059519 |
| --- | --- | --- | --- | --- | --- | --- |
| PCDHB7 | PCDB7 | 20 | -0.22619 | 0.054569 | 3.40E-05 | 0.797569 |
| CISD2 | CISD2 | 4 | -0.27537 | 0. 134877 | 0.041189 | 0.759293 |
| C1orf186 | CA186 | 8 | -0.25751 | 0.089905 | 0.00418 | 0.772974 |
| IL10RA | IL | 12 | -0.28598 | 0.076539 | 0.000187 | 0.751275 |
| FLT1 | VEGF | 64 | -0.05683 | 0.025169 | 0.023938 | 0.94475 |
| ICAM5 | sICAM | 166 | 0.023977 | 0.011412 | 0.03564 | 1.024267 |
| SIGLEC14 | SIG14 | 300 | 0.016865 | 0.007657 | 0.027615 | 1.017008 |
| ALK | ALK | 7 | -0.29679 | 0.098227 | 0.002515 | 0.743199 |
| POMGNT1 | PMGT1 | 7 | -0.32192 | 0. 110437 | 0.003557 | 0.724753 |
| STOM | STOM | 7 | -0.22953 | 0.096742 | 0.017662 | 0.794904 |
| TNFRSF11B | OPG | 43 | 0.078458 | 0.039499 | 0.046997 | 1.081618 |
| SULF2 | SULF2 | 17 | -0.32658 | 0.066097 | 7.78E-07 | 0.721386 |
| PRRG1 | TMG1 | 12 | -0.38503 | 0.084991 | 5.89E-06 | 0.680434 |
| SPRED1 | SPRE1 | 5 | -0.27394 | 0. 120222 | 0.02269 | 0.760379 |
| TFF3 | TFF3 | 24 | -0. 13955 | 0.035926 | 0.000103 | 0.869748 |
| ETNK1 | EKI1 | 7 | -0.35411 | 0. 116701 | 0.002411 | 0.701797 |
| TCP11 | TCP11 | 69 | -0.05203 | 0.025333 | 0.040007 | 0.949304 |
| PRSS57 | PRS57 | 99 | 0.035852 | 0.014387 | 0.012705 | 1.036503 |
| KIAA1324L | K132L | 16 | -0. 15661 | 0.073827 | 0.033893 | 0.855035 |
| C1orf115 | CA115 | 19 | -0.25159 | 0.055605 | 6.05E-06 | 0.77756 |
| DLK1 | DLK1 | 20 | -0.24108 | 0.052773 | 4.92E-06 | 0.785782 |
| LRRC74A | CN16B | 35 | -0. 12807 | 0.032504 | 8. 14E-05 | 0.879791 |
| RNASE2 | RNase | 6 | -0. 17636 | 0.073946 | 0.017077 | 0.838312 |
| QSOX2 | QSOX2 | 266 | -0.01823 | 0.007952 | 0.021852 | 0.981931 |
| GRP | Gastrin | 15 | -0.20861 | 0.064672 | 0.001257 | 0.811709 |
| RSPO2 | RSPO2 | 7 | -0.24401 | 0. 104544 | 0.019596 | 0.783483 |
| CTNNB1 | b | 59 | -0. 12014 | 0.02663 | 6.44E-06 | 0.886792 |
| DMKN | Dermokine | 15 | -0.25467 | 0.069373 | 0.000242 | 0.775173 |
| PLVAP | PLVAP | 15 | 0. 153534 | 0.064875 | 0.017952 | 1. 165948 |
| ARL8B | ARL8B | 3 | -0.51621 | 0. 164033 | 0.00165 | 0.596778 |
| SPINK14 | ISK52 | 22 | -0.23449 | 0.053525 | 1. 18E-05 | 0.790976 |
| ERMAP | ERMAP | 15 | 0. 11901 | 0.058729 | 0.04272 | 1. 126382 |
| RNF128 | RN128 | 36 | -0. 16362 | 0.038936 | 2.64E-05 | 0.849067 |
| ZPBP | ZPBP1 | 29 | -0. 1621 | 0.038065 | 2.06E-05 | 0.850358 |
| LRRTM4 | LRRT4 | 25 | -0.22822 | 0.049896 | 4.79E-06 | 0.795949 |
| DNAJC4 | DNJC4 | 34 | -0. 12639 | 0.037327 | 0.000709 | 0.881275 |
| ADAM10 | ADAM | 18 | -0.20208 | 0.053697 | 0.000168 | 0.817026 |
| PKDCC | PKDCC | 43 | -0. 13905 | 0.032332 | 1.70E-05 | 0.87018 |
| TRAPPC5 | TPPC5 | 13 | -0.31204 | 0.071732 | 1.36E-05 | 0.731952 |
| PGRMC2 | PGRC2 | 32 | -0. 16505 | 0.041079 | 5.87E-05 | 0.847852 |
| GAL3ST1 | G3ST1 | 101 | -0.07925 | 0.019055 | 3.20E-05 | 0.923811 |
| GPC1 | Glypican | 83 | -0.04584 | 0.021211 | 0.030689 | 0.955197 |
| CRIM1 | CRIM1 | 5 | -0.25024 | 0. 10772 | 0.020178 | 0.778617 |
| GALNT11 | GLT11 | 22 | -0.21857 | 0.048461 | 6.47E-06 | 0.803665 |
| CD74 | HG2A | 5 | -0.38302 | 0. 149186 | 0.010247 | 0.681801 |
| CD1D | CD1D | 15 | -0.29668 | 0.085675 | 0.000534 | 0.743279 |
| ECE1 | Endothelin | 46 | -0. 12708 | 0.02899 | 1. 17E-05 | 0.880666 |
| FAM24B | FA24B | 4 | -0.52891 | 0. 141727 | 0.00019 | 0.589248 |
| ERLIN1 | ERLN1 | 29 | -0. 1322 | 0.043306 | 0.002269 | 0.87617 |
| ARMC5 | ARMC5 | 23 | -0.26036 | 0.051576 | 4.46E-07 | 0.770772 |
| DPEP1 | DPEP1 | 122 | -0.03036 | 0.013781 | 0.027594 | 0.970096 |
| TTC17 | TTC17 | 3 | -0.39966 | 0. 161299 | 0.013221 | 0.670548 |
| PVRL1 | nectin | 3 | -0.33624 | 0. 137939 | 0.014785 | 0.714452 |
| PSAPL1 | SAPL1 | 59 | -0.04658 | 0.019618 | 0.017579 | 0.954487 |
| OLFML1 | OLFL1 | 11 | -0.2784 | 0.081955 | 0.000681 | 0.756997 |
| ESRP1 | ESRP1 | 6 | -0.45505 | 0. 143776 | 0.001551 | 0.634417 |
| TNFSF10 | TRAIL | 6 | -0.37564 | 0. 11902 | 0.001599 | 0.686847 |

| MTX2 | Metaxin | 4 | -0.32987 | 0. 148048 | 0.02587 | 0.719014 |
| --- | --- | --- | --- | --- | --- | --- |
| C1S | C1s | 76 | 0.046277 | 0.019022 | 0.014983 | 1.047364 |
| PLA2G2C | PA2GC | 7 | -0.25126 | 0. 10294 | 0.014655 | 0.777824 |
| CLEC4A | CLC4A | 20 | -0. 19009 | 0.052812 | 0.000319 | 0.826886 |
| BATF3 | BATF3 | 17 | -0. 11323 | 0.042669 | 0.007961 | 0.892944 |
| CENPW | CENPW | 7 | -0.35182 | 0. 107997 | 0.001123 | 0.703407 |
| NPM1 | NPM1 | 23 | -0.20932 | 0.052386 | 6.45E-05 | 0.811138 |
| NRXN2 | NRX2B | 23 | -0.22943 | 0.049069 | 2.93E-06 | 0.794989 |
| CCPG1 | CCPG1 | 13 | -0.21527 | 0.072199 | 0.002867 | 0.806322 |
| LRRC37A2 | L37A2 | 5 | -0.53104 | 0. 172922 | 0.002134 | 0.587994 |
| LRTM2 | LRTM2 | 59 | -0. 1331 | 0.027153 | 9.50E-07 | 0.875379 |
| GALNT16 | GLTL1 | 39 | -0.06425 | 0.026362 | 0.014808 | 0.937774 |
| BDP1 | BDP1 | 16 | -0. 19148 | 0.061469 | 0.001839 | 0.825734 |
| MRPL21 | RM21 | 12 | -0. 14552 | 0.070918 | 0.04017 | 0.864569 |
| NR1H4 | NR1H4 | 30 | -0. 1789 | 0.042199 | 2.24E-05 | 0.836189 |
| CLCA2 | CLCA2 | 21 | -0. 16303 | 0.047934 | 0.000671 | 0.849563 |
| CSPG4 | CSPG4 | 17 | -0.23277 | 0.063383 | 0.00024 | 0.792338 |
| GLT8D1 | GL8D1 | 90 | -0.06336 | 0.017704 | 0.000345 | 0.938603 |
| ADAM17 | ADAM | 14 | -0.24701 | 0.068603 | 0.000318 | 0.781135 |
| RPS6KB1 | KS6B1 | 47 | -0.06882 | 0.032585 | 0.034688 | 0.933496 |
| DUSP26 | DUS26 | 19 | -0.2051 | 0.055617 | 0.000226 | 0.814568 |
| B4GALNT1 | B4GN1 | 3 | -0.52805 | 0.252487 | 0.036493 | 0.589755 |
| SERAC1 | SRAC1 | 24 | -0. 18514 | 0.046213 | 6. 17E-05 | 0.830985 |
| ATP1B3 | AT1B3 | 50 | -0. 13769 | 0.029083 | 2.20E-06 | 0.871369 |
| CEACAM3 | CEAM3 | 14 | -0.2682 | 0.068509 | 9.05E-05 | 0.764752 |
| SLC3A1 | SLC31 | 21 | -0. 19188 | 0.053642 | 0.000347 | 0.825405 |
| MARCO | MARCO | 32 | -0. 10179 | 0.039663 | 0.010275 | 0.903218 |
| PRRG1 | TMG1 | 15 | -0.23613 | 0.066533 | 0.000387 | 0.78968 |
| PRPF6 | PRP6 | 15 | -0.33245 | 0.076681 | 1.45E-05 | 0.717163 |
| PRG3 | PRG3 | 51 | -0. 11723 | 0.035694 | 0.001022 | 0.889379 |
| LCT | LPH | 292 | 0.027396 | 0.007059 | 0.000104 | 1.027775 |
| HAVCR1 | TIM | 77 | 0.07904 | 0.021034 | 0.000171 | 1.082248 |
| DEFB132 | DB132 | 71 | -0. 10854 | 0.022293 | 1. 12E-06 | 0.897142 |
| AHSP | AHSP | 35 | -0. 1652 | 0.034451 | 1.62E-06 | 0.847724 |
| MTPAP | PAPD1 | 16 | -0.2327 | 0.067711 | 0.000589 | 0.792395 |
| ROS1 | ROS1 | 39 | -0. 15874 | 0.034732 | 4.86E-06 | 0.853214 |
| STX18 | STX18 | 3 | -0.33662 | 0. 14859 | 0.023488 | 0.714183 |
| JTB | JTB | 24 | -0. 16706 | 0.048493 | 0.000571 | 0.846147 |
| TOR1AIP1 | TOIP1 | 109 | 0.072377 | 0.020952 | 0.000551 | 1.075061 |
| EPDR1 | EPDR1 | 4 | -0.4323 | 0. 171039 | 0.011487 | 0.649012 |
| TFIP11 | TFP11 | 33 | -0. 13863 | 0.035604 | 9.88E-05 | 0.87055 |
| CNTNAP5 | CNTP5 | 21 | -0.21603 | 0.052738 | 4.20E-05 | 0.80571 |
| IL32 | IL32 | 5 | -0.245 | 0. 105297 | 0.01998 | 0.782707 |
| RAPGEF5 | RPGF5 | 44 | -0. 1308 | 0.029566 | 9.70E-06 | 0.877398 |
| IGSF9B | TUTLB | 5 | -0.35688 | 0. 13411 | 0.007789 | 0.699859 |
| ARHGEF10 | ARHGA | 6 | 0.329237 | 0.09788 | 0.000769 | 1.389907 |
| JAKMIP3 | JKIP3 | 89 | 0.070616 | 0.022359 | 0.001587 | 1.073169 |
| FAXDC2 | CE004 | 11 | -0.21841 | 0.081139 | 0.007105 | 0.803792 |
| SLC30A3 | ZNT3 | 45 | -0. 1441 | 0.030237 | 1.88E-06 | 0.865798 |
| ANGPTL1 | ANGL1 | 31 | -0. 16485 | 0.04106 | 5.95E-05 | 0.848025 |
| C5orf46 | CE046 | 9 | -0. 17484 | 0.078188 | 0.025341 | 0.83959 |
| ARMC10 | ARM10 | 5 | -0.5979 | 0. 127161 | 2.58E-06 | 0.549965 |
| JPH4 | JPH4 | 67 | 0.060008 | 0.023629 | 0.011099 | 1.061845 |
| UMODL1 | UROL1 | 12 | -0.28224 | 0.082979 | 0.000671 | 0.754095 |
| HEPACAM2 | HECA2 | 19 | -0.26792 | 0.055795 | 1.57E-06 | 0.764971 |
| FUT2 | FUT2 | 10 | -0.35027 | 0.082472 | 2. 16E-05 | 0.704495 |
| MASP1 | MASP3 | 7 | -0.32627 | 0.094244 | 0.000536 | 0.721612 |
| SLC26A5 | S26A5 | 3 | -0.39439 | 0. 171409 | 0.021399 | 0.674092 |

| FLRT3 | FLRT3 | 18 | -0.22334 | 0.056878 | 8.61E-05 | 0.799842 |
| --- | --- | --- | --- | --- | --- | --- |
| CCL26 | Eotaxin | 14 | -0.30187 | 0.067395 | 7.49E-06 | 0.739434 |
| DSCAM | DSCAM | 19 | -0. 19781 | 0.065581 | 0.002559 | 0.820526 |
| MUC1 | MUC1 | 48 | -0.09724 | 0.030238 | 0.001301 | 0.907339 |
| IFNAR1 | IFN | 186 | 0.024679 | 0.011061 | 0.025667 | 1.024986 |
| CD63 | CD63 | 7 | -0.24706 | 0. 102723 | 0.016169 | 0.781097 |
| LGALS9 | LEG9 | 26 | -0. 12368 | 0.053272 | 0.020253 | 0.883665 |
| UBE2G2 | UB2G2 | 53 | -0. 17206 | 0.030799 | 2.31E-08 | 0.841926 |
| EPHB3 | EPHB3 | 12 | 0. 12019 | 0.059317 | 0.04274 | 1. 127711 |
| CTRL | CTRL | 32 | -0. 18844 | 0.043513 | 1.49E-05 | 0.82825 |
| TFPI2 | TFPI | 27 | -0. 15752 | 0.052113 | 0.002506 | 0.854261 |
| PLXDC1 | PXDC1 | 76 | 0.051293 | 0.021868 | 0.018998 | 1.052631 |
| SIRPG | SIRPG | 30 | -0. 16424 | 0.040048 | 4. 11E-05 | 0.848535 |
| FCER1A | FCERA | 41 | -0. 11757 | 0.030536 | 0.000118 | 0.889075 |
| IL17C | IL | 15 | -0.2391 | 0.064134 | 0.000193 | 0.787335 |
| CPA4 | CBPA4 | 473 | -0.01734 | 0.00639 | 0.006663 | 0.982812 |
| STIM1 | STIM1 | 48 | -0. 13968 | 0.02829 | 7.92E-07 | 0.869638 |
| CTSL | Cathepsin | 286 | 0.01534 | 0.007616 | 0.044003 | 1.015458 |
| CPA2 | CBPA2 | 16 | -0.2042 | 0.060338 | 0.000713 | 0.815295 |
| SPR | SPRE | 7 | -0.30297 | 0.087478 | 0.000533 | 0.738622 |
| FKBP7 | FKBP7 | 61 | -0.05978 | 0.022722 | 0.008517 | 0.941972 |
| GADD45GIP | G45IP | 18 | -0. 18997 | 0.063686 | 0.002855 | 0.826986 |
| DEFB118 | DB118 | 5 | -0.29085 | 0. 119496 | 0.014934 | 0.747627 |
| CD8B | CD8B | 52 | -0. 1301 | 0.028434 | 4.75E-06 | 0.87801 |
| PSG5 | PSG5 | 227 | -0.03106 | 0.010845 | 0.004185 | 0.969419 |
| LRRC25 | LRC25 | 34 | -0. 14135 | 0.034857 | 5.01E-05 | 0.868184 |
| RCN1 | RCN1 | 17 | -0. 12839 | 0.057593 | 0.025802 | 0.879514 |
| LYPD1 | LYPD1 | 15 | -0.29881 | 0.068937 | 1.46E-05 | 0.741701 |
| ERP27 | ERP27 | 4 | -0.37461 | 0. 15438 | 0.015244 | 0.68756 |
| TAC1 | TKN1 | 28 | -0. 1506 | 0.036979 | 4.65E-05 | 0.860188 |
| FSTL4 | FSTL4 | 12 | -0. 18469 | 0.08332 | 0.02665 | 0.831364 |
| CT55 | CX048 | 13 | -0.26716 | 0.067162 | 6.96E-05 | 0.765554 |
| EYS | EYS | 9 | -0.37327 | 0.095494 | 9.27E-05 | 0.688477 |
| MPZL2 | MPZL2 | 64 | -0. 11813 | 0.022184 | 1.01E-07 | 0.888585 |
| NNAT | NNAT | 44 | -0. 15809 | 0.030818 | 2.90E-07 | 0.85377 |
| FIBCD1 | FBCD1 | 26 | -0.21031 | 0.045205 | 3.28E-06 | 0.810333 |
| SMIM10 | CX069 | 4 | -0.45319 | 0. 173521 | 0.009008 | 0.635595 |
| CHI3L2 | CH3L2 | 44 | -0. 15392 | 0.031569 | 1.09E-06 | 0.857345 |
| TTC9B | TTC9B | 22 | -0.09453 | 0.04274 | 0.026979 | 0.909797 |
| MGAT4A | MGT4A | 43 | -0. 14758 | 0.032239 | 4.70E-06 | 0.862793 |
| DCBLD1 | DCBD1 | 3 | -0.4695 | 0. 158635 | 0.00308 | 0.625312 |
| ACVR2B | Activin | 7 | -0.31989 | 0.090621 | 0.000416 | 0.726229 |
| DGCR6 | DGCR6 | 18 | -0.22567 | 0.057546 | 8.79E-05 | 0.797978 |
| CAV2 | CAV2 | 30 | -0. 16232 | 0.041441 | 8.97E-05 | 0.850173 |
| LMAN2 | Lectin | 14 | 0. 137962 | 0.061069 | 0.023875 | 1. 147932 |
| GPX5 | GPX5 | 3 | -0.36011 | 0. 170982 | 0.035194 | 0.6976 |
| DEFB125 | DB125 | 3 | -0.41761 | 0. 170395 | 0.014254 | 0.658622 |
| GHRH | Growth | 19 | -0.25034 | 0.056021 | 7.87E-06 | 0.778533 |
| CXCL17 | VCC1 | 27 | -0. 19911 | 0.043282 | 4.22E-06 | 0.819458 |
| NXPH2 | NXPH2 | 57 | -0. 10835 | 0.023188 | 2.97E-06 | 0.897313 |
| AIFM1 | AIF | 18 | -0. 17326 | 0.060343 | 0.004088 | 0.840915 |
| ITM2C | ITM2C | 6 | -0.31558 | 0. 118108 | 0.007542 | 0.729368 |
| SPATA31D4 | S31D4 | 10 | -0.34253 | 0.095791 | 0.000349 | 0.709972 |
| WBP1L | WBP1L | 5 | -0.47888 | 0. 14418 | 0.000896 | 0.619478 |
| EDDM3A | EP3A | 4 | -0.35205 | 0. 169959 | 0.038324 | 0.703247 |
| GZMK | Granzyme | 58 | -0.07928 | 0.031572 | 0.012034 | 0.923779 |
| TTC17 | TTC17 | 3 | -0.39685 | 0. 182112 | 0.029322 | 0.672438 |
| BIN1 | BIN1 | 7 | -0. 19381 | 0.081784 | 0.017797 | 0.823813 |

| MNX1 | MNX1 | 10 | -0.27823 | 0.084958 | 0.001057 | 0.757119 |
| --- | --- | --- | --- | --- | --- | --- |
| SYT2 | SYT2 | 9 | -0.37182 | 0.088447 | 2.62E-05 | 0.689477 |
| LAMC2 | Laminin | 149 | 0.048158 | 0.013663 | 0.000424 | 1.049336 |
| PRPF6 | PRP6 | 55 | -0. 1316 | 0.026926 | 1.02E-06 | 0.876688 |
| CLMP | ACAM | 5 | -0.29504 | 0. 1239 | 0.017253 | 0.744502 |
| PRR27 | CD040 | 22 | -0. 1785 | 0.057422 | 0.00188 | 0.836526 |
| MMP16 | MMP | 5 | -0.3494 | 0. 133042 | 0.008633 | 0.705108 |
| MMRN2 | EMILIN | 17 | -0.22188 | 0.055785 | 6.97E-05 | 0.801014 |
| GHDC | GHDC | 11 | -0. 19576 | 0.080516 | 0.015042 | 0.822206 |
| RIPPLY1 | RIPP1 | 6 | -0.4508 | 0. 141219 | 0.001412 | 0.637115 |
| NLGN2 | NLGN2 | 16 | 0. 120135 | 0.060679 | 0.047719 | 1. 127649 |
| RNF149 | RN149 | 40 | -0. 13282 | 0.032864 | 5.31E-05 | 0.875626 |
| TMEM52B | TM52B | 20 | -0. 13638 | 0.056399 | 0.015603 | 0.872513 |
| HERPUD2 | HERP2 | 6 | -0.36407 | 0. 121735 | 0.002783 | 0.694839 |
| DNAJC11 | DJC11 | 6 | -0.31091 | 0. 148804 | 0.036674 | 0.732782 |
| IER3 | IEX1 | 37 | -0. 14594 | 0.035427 | 3.80E-05 | 0.86421 |
| NDUFB8 | NDUB8 | 16 | -0.32382 | 0.07038 | 4.21E-06 | 0.723382 |
| NUP210 | PO210 | 22 | -0.24385 | 0.053606 | 5.39E-06 | 0.783602 |
| VAV3 | VAV3 | 36 | -0. 16894 | 0.041477 | 4.64E-05 | 0.844558 |
| DCK | DCK | 8 | -0.3527 | 0. 110563 | 0.001423 | 0.70279 |
| TIRAP | Tirap | 16 | -0. 11958 | 0.047678 | 0.012142 | 0.887296 |
| CTNNB1 | b | 182 | -0.03998 | 0.01218 | 0.00103 | 0.960811 |
| DHPS | DHYS | 10 | -0.36608 | 0.087838 | 3.08E-05 | 0.693444 |
| FBP2 | F16P2 | 29 | -0. 17257 | 0.042485 | 4.87E-05 | 0.841503 |
| CTNNA2 | CTNA2 | 4 | -0.41592 | 0.205679 | 0.043158 | 0.659734 |
| ESRRA | ERRalpha | 8 | -0.2512 | 0.09086 | 0.005697 | 0.777864 |
| THOC1 | THOC1 | 13 | -0.21029 | 0.088065 | 0.016945 | 0.810349 |
| RBBP6 | RBBP6 | 9 | -0.26892 | 0.08835 | 0.002336 | 0.764205 |
| FOXG1 | FOXGB | 25 | -0.23772 | 0.050659 | 2.70E-06 | 0.788425 |
| MCM6 | MCM6 | 11 | -0.2826 | 0.082595 | 0.000623 | 0.753822 |
| ARID1A | ARI1A | 19 | -0.23098 | 0.069297 | 0.000859 | 0.793754 |
| NEFH | NFH | 26 | -0. 19597 | 0.045032 | 1.35E-05 | 0.822041 |
| TNKS | Tankyrase | 6 | -0.44826 | 0. 154898 | 0.003805 | 0.638737 |
| MTAP | MTAP | 34 | 0.088027 | 0.039477 | 0.025759 | 1.092018 |
| SOS1 | SOS1 | 3 | -0.81242 | 0.237583 | 0.000627 | 0.443785 |
| GABBR2 | GABR2 | 7 | -0.29747 | 0. 121508 | 0.01436 | 0.742695 |
| PITPNA | PIPNA | 13 | -0.29723 | 0.064877 | 4.62E-06 | 0.742871 |
| LNX1 | LNX1 | 20 | -0.23793 | 0.052883 | 6.82E-06 | 0.788258 |
| PCDHB1 | PCDB1 | 30 | -0. 18204 | 0.042406 | 1.76E-05 | 0.833564 |
| TOPBP1 | TOPB1 | 4 | -0.3515 | 0. 137277 | 0.010452 | 0.703634 |
| NPIPB3 | NPPL3 | 47 | -0. 13189 | 0.028978 | 5.33E-06 | 0.876438 |
| RNF148 | RN148 | 4 | -0.37028 | 0. 154839 | 0.016786 | 0.690543 |
| ADAM15 | ADA15 | 11 | -0.29296 | 0.088749 | 0.000963 | 0.746052 |
| RNF114 | RN114 | 7 | -0.37009 | 0. 127556 | 0.003715 | 0.690672 |
| TMEM59L | TM59L | 22 | -0. 14872 | 0.05442 | 0.00628 | 0.861812 |
| TBC1D5 | TBCD5 | 5 | -0.33079 | 0. 127797 | 0.009643 | 0.718357 |
| CDHR5 | MUCDL | 30 | -0.2129 | 0.046982 | 5.86E-06 | 0.808239 |
| MYZAP | MYZAP | 15 | -0.29789 | 0.073144 | 4.65E-05 | 0.742381 |
| SLC22A16 | S22AG | 99 | 0.096116 | 0.021136 | 5.43E-06 | 1. 100886 |
| DLL3 | DLL3 | 66 | -0.04601 | 0.019638 | 0.019131 | 0.955032 |
| PRSS35 | PRS35 | 24 | -0. 15137 | 0.048826 | 0.001934 | 0.85953 |
| YIPF6 | YIPF6 | 21 | -0.20698 | 0.049984 | 3.46E-05 | 0.813037 |
| ZNF264 | ZN264 | 6 | -0.24409 | 0. 110732 | 0.027498 | 0.783413 |
| ATP4B | ATP4B | 6 | -0.28994 | 0. 120012 | 0.015694 | 0.748306 |

GENE,gene;PRO,protein;BETA,beta;SE, standarderror;P, pvalue;OR,Odds Ratio

**Supplementary Table S3:** 141 intersecting genes were obtained by taking the intersection of 435 genes significantly associated with asthma and 1385 genes significantly associated with sepsis

| GENE | PRO | nSNP | BETA | SE | P | OR |
| --- | --- | --- | --- | --- | --- | --- |
| HOGA1 | HOGA1 | 7 | -0.01187 | 0.003888 | 0.002259 | 0.988196 |
| NCF2 | NCF | 63 | 0.002572 | 0.00088 | 0.003469 | 1.002576 |
| AGA | ASPG | 9 | -0.00699 | 0.003291 | 0.033661 | 0.993035 |
| TMEM190 | TM190 | 244 | -0.00088 | 0.000389 | 0.024604 | 0.999125 |
| PSMB6 | PSB6 | 5 | -0.01309 | 0.004893 | 0.007483 | 0.986998 |
| LYSMD3 | LYSM3 | 3 | -0.01566 | 0.006311 | 0.013065 | 0.984458 |
| SUDS3 | SDS3 | 13 | -0.01223 | 0.005567 | 0.02799 | 0.987842 |
| IL20RB | IL | 26 | 0.058524 | 0.010703 | 4.55E-08 | 1.060271 |
| CHRD | CHRD | 27 | 0.048481 | 0.011302 | 1.79E-05 | 1.049675 |
| REPIN1 | REPI1 | 8 | -0.00768 | 0.003487 | 0.027627 | 0.99235 |
| ANXA10 | ANX10 | 9 | -0.02161 | 0.010252 | 0.035018 | 0.978619 |
| AK5 | Adenylate | 12 | -0.01484 | 0.007348 | 0.0434 | 0.985268 |
| NAB1 | NAB1 | 5 | 0.011101 | 0.005266 | 0.035002 | 1.011163 |
| GABBR2 | GABR2 | 11 | -0.01324 | 0.004673 | 0.004617 | 0.98685 |
| CGA | Glycoprotein | 12 | -0.05242 | 0.025597 | 0.040567 | 0.948929 |
| NCF4 | NCF4 | 20 | -0.02802 | 0.012453 | 0.024459 | 0.972372 |
| TRAPPC3 | TPPC3 | 48 | -0.01875 | 0.006499 | 0.003921 | 0.981429 |
| AKT2 | PKB | 45 | 0.006868 | 0.001524 | 6.59E-06 | 1.006891 |
| MAD2L1 | MD2L1 | 12 | -0.01259 | 0.005418 | 0.02014 | 0.98749 |
| IFNA4 | IFNA4 | 4 | -0.01251 | 0.006091 | 0.040057 | 0.987573 |
| GLIPR2 | GAPR1 | 45 | 0.003247 | 0.001641 | 0.047823 | 1.003252 |
| EPHB4 | EphB4 | 42 | -0.0044 | 0.001452 | 0.002463 | 0.995612 |
| FLT4 | VEGF | 181 | -0.00226 | 0.00069 | 0.001031 | 0.997739 |
| LGR5 | LGR5 | 8 | -0.01687 | 0.008118 | 0.037714 | 0.983272 |
| BTLA | BTLA | 6 | -0.01071 | 0.003929 | 0.006387 | 0.989343 |
| TLR1 | TLR1 | 32 | -0.01859 | 0.008172 | 0.022911 | 0.981581 |
| RNASET2 | RNT2 | 73 | 0.003476 | 0.001346 | 0.009791 | 1.003482 |
| SULT1E1 | SULT | 3 | -0.01402 | 0.005154 | 0.006512 | 0.986074 |
| ZADH2 | ZADH2 | 4 | -0.01185 | 0.005364 | 0.027215 | 0.988224 |
| SYNJ2BP | SYJ2B | 4 | -0.01316 | 0.005093 | 0.009743 | 0.986922 |
| DCUN1D1 | DCNL1 | 45 | -0.01085 | 0.003285 | 0.000963 | 0.989213 |
| CD46 | CD46 | 26 | -0.00696 | 0.001732 | 5.82E-05 | 0.99306 |
| TPP1 | TPP1 | 36 | 0.003953 | 0.001626 | 0.01507 | 1.003961 |
| BTN3A3 | BT3A3 | 362 | -0.00561 | 0.000753 | 8.83E- 14 | 0.994403 |
| GMNN | GEMI | 9 | -0.02417 | 0.011314 | 0.03263 | 0.976117 |
| APTX | APTX | 13 | -0.01385 | 0.002934 | 2.36E-06 | 0.986246 |
| TP53I3 | QORX | 83 | -0.00228 | 0.001156 | 0.04875 | 0.997725 |
| SERF2 | SERF2 | 5 | -0.00898 | 0.004507 | 0.046239 | 0.991056 |
| STXBP6 | STXB6 | 37 | 0.008452 | 0.001469 | 8.79E-09 | 1.008488 |
| COMT | Catechol | 22 | -0.00433 | 0.001769 | 0.014374 | 0.995678 |
| AES | AES | 14 | -0.02127 | 0.009603 | 0.026762 | 0.978954 |
| TBPL1 | TBPL1 | 26 | 0.008759 | 0.003115 | 0.004927 | 1.008797 |
| LCN2 | Lipocalin | 25 | 0.015107 | 0.006447 | 0.019124 | 1.015221 |
| IL18RAP | IL | 7 | -0.00853 | 0.00391 | 0.029242 | 0.991511 |
| SIGLEC9 | Siglec | 223 | -0.00104 | 0.000423 | 0.013604 | 0.998956 |
| FGF2 | FGF  b | 154 | 0.003841 | 0.000981 | 9.04E-05 | 1.003849 |
| IL13 | IL | 11 | -0.01382 | 0.006191 | 0.025616 | 0.986276 |
| AURKA | Aurora | 15 | -0.00946 | 0.00472 | 0.045121 | 0.990588 |
| CD33 | Siglec | 246 | 0.001397 | 0.000481 | 0.003695 | 1.001398 |
| TMPRSS15 | Enterokinase | 8 | -0.01872 | 0.008706 | 0.03152 | 0.981452 |
| KREMEN2 | KREM2 | 3 | -0.01471 | 0.005625 | 0.008925 | 0.985399 |
| CA6 | Carbonic | 178 | 0.002943 | 0.000738 | 6.61E-05 | 1.002947 |
| CD207 | CLC4K | 6 | -0.01313 | 0.004487 | 0.003426 | 0.986955 |
| PLK1 | PLK | 3 | -0.01941 | 0.00671 | 0.003826 | 0.980781 |
| PTPN2 | TCPTP | 12 | -0.02156 | 0.009534 | 0.02376 | 0.978675 |

| CXCL8 | IL | 6 | -0.02782 | 0.013173 | 0.034723 | 0.972567 |
| --- | --- | --- | --- | --- | --- | --- |
| B2M | b2 | 52 | 0.017121 | 0.005513 | 0.001899 | 1.017268 |
| SERPINA1 | a1 | 129 | -0.00202 | 0.000623 | 0.001156 | 0.997979 |
| MMEL1 | MMEL2 | 3 | -0.01581 | 0.00662 | 0.016963 | 0.984319 |
| TEK | sTie | 67 | -0.00484 | 0.001894 | 0.010616 | 0.995171 |
| HSPA1A | HSP | 22 | -0.04581 | 0.014397 | 0.001464 | 0.955225 |
| CCL24 | Eotaxin | 15 | -0.01611 | 0.007848 | 0.040067 | 0.984017 |
| CFB | Factor | 136 | 0.006897 | 0.00234 | 0.0032 | 1.006921 |
| GZMB | Granzyme | 27 | -0.02875 | 0.008858 | 0.00117 | 0.971655 |
| XCL1 | Lymphotactin | 5 | -0.01106 | 0.004516 | 0.01436 | 0.989005 |
| IGF1R | IGF | 34 | -0.00693 | 0.001779 | 9.76E-05 | 0.993093 |
| PSMA2 | PSA2 | 21 | -0.01847 | 0.009246 | 0.04571 | 0.981696 |
| FCRL3 | FCRL3 | 148 | -0.00247 | 0.000854 | 0.003886 | 0.997536 |
| CCL19 | MIP | 42 | -0.02022 | 0.006818 | 0.00302 | 0.979983 |
| ATP5B | ATP | 28 | -0.01609 | 0.008026 | 0.045036 | 0.984043 |
| HPGD | HPG | 10 | 0.005445 | 0.002407 | 0.023708 | 1.00546 |
| UCHL1 | PGP9 | 30 | 0.003949 | 0.001579 | 0.012406 | 1.003956 |
| SPTAN1 | SPTA2 | 3 | -0.01363 | 0.006941 | 0.049557 | 0.986461 |
| JAG1 | JAG1 | 16 | -0.00901 | 0.00332 | 0.006641 | 0.991028 |
| MICB | MICB | 322 | -0.00836 | 0.000695 | 2.67E-33 | 0.991673 |
| TGFBR2 | TGF | 6 | -0.00982 | 0.003609 | 0.006504 | 0.990227 |
| UNC5C | UNC5H3 | 27 | -0.00427 | 0.001692 | 0.011639 | 0.995739 |
| GCKR | GCKR | 13 | -0.01143 | 0.005716 | 0.045534 | 0.988636 |
| STK17B | DRAK2 | 8 | -0.02701 | 0.013588 | 0.046815 | 0.973349 |
| GPC6 | GPC6 | 20 | 0.003395 | 0.001525 | 0.026056 | 1.0034 |
| IL17RC | IL | 3 | -0.02778 | 0.013785 | 0.043869 | 0.972601 |
| SNRPF | RUXF | 25 | 0.006504 | 0.002006 | 0.001185 | 1.006525 |
| ZPLD1 | ZPLD1 | 6 | -0.0404 | 0.020433 | 0.048035 | 0.960407 |
| CTRB2 | CTRB2 | 341 | -0.00101 | 0.00039 | 0.009771 | 0.998993 |
| SEMA3B | SEM3B | 8 | -0.02574 | 0.011441 | 0.024488 | 0.974593 |
| GZMM | Granzyme | 5 | -0.01855 | 0.008807 | 0.035166 | 0.981619 |
| IFNL3 | IFN | 12 | 0.068549 | 0.023888 | 0.00411 | 1.070953 |
| IFNA6 | IFNA6 | 6 | -0.02664 | 0.011552 | 0.021102 | 0.973712 |
| CSAG1 | CSAG1 | 38 | 0.006498 | 0.001607 | 5.26E-05 | 1.006519 |
| ACP6 | PPA6 | 370 | -0.00115 | 0.000492 | 0.019932 | 0.998855 |
| LEPRE1 | P3H1 | 10 | -0.01704 | 0.008403 | 0.042597 | 0.983106 |
| MANBA | MANBA | 106 | -0.00438 | 0.001093 | 6. 11E-05 | 0.995627 |
| VWA1 | VWA1 | 48 | -0.00252 | 0.001024 | 0.014016 | 0.997487 |
| CCDC126 | CC126 | 82 | 0.003151 | 0.001095 | 0.003995 | 1.003156 |
| APOC3 | Apo | 63 | -0.01122 | 0.004582 | 0.014345 | 0.988843 |
| PLBD2 | LAML2 | 9 | -0.01005 | 0.003398 | 0.003114 | 0.990004 |
| SAYSD1 | SMDC1 | 8 | -0.01521 | 0.007172 | 0.03389 | 0.984901 |
| NDNF | CD031 | 10 | -0.01991 | 0.009984 | 0.046168 | 0.98029 |
| LRP11 | LRP11 | 311 | 0.001033 | 0.000493 | 0.036103 | 1.001034 |
| CNTNAP2 | CNTP2 | 95 | 0.001954 | 0.000866 | 0.024048 | 1.001956 |
| MRPL52 | RM52 | 5 | -0.0119 | 0.004763 | 0.012481 | 0.988172 |
| S100A13 | S100A13 | 291 | 0.001145 | 0.000524 | 0.028963 | 1.001145 |
| HLA | DQA2 | 85 | -0.01543 | 0.003694 | 2.95E-05 | 0.984685 |
| IGFBPL1 | IBPL1 | 3 | -0.01297 | 0.005887 | 0.027555 | 0.987112 |
| C1D | C1D | 7 | -0.01847 | 0.007816 | 0.018108 | 0.981698 |
| SMR3A | SMR3A | 4 | -0.0151 | 0.004981 | 0.002431 | 0.985012 |
| SPTLC1 | SPTC1 | 4 | -0.0104 | 0.0051 | 0.041444 | 0.989654 |
| ST8SIA2 | SIA8B | 3 | -0. 10788 | 0.019879 | 5.73E-08 | 0.897733 |
| SYT8 | SYT8 | 4 | -0.01377 | 0.005046 | 0.006358 | 0.986325 |
| HRK | HRK | 10 | -0.01816 | 0.009242 | 0.049423 | 0.982004 |
| FTMT | FTMT | 262 | -0.00568 | 0.001175 | 1.33E-06 | 0.994332 |
| CD3E | CD3E | 70 | -0.00813 | 0.002957 | 0.005956 | 0.991901 |
| ALK | ALK | 4 | -0.01175 | 0.005937 | 0.047759 | 0.988316 |

| POMGNT1 | PMGT1 | 4 | -0.04761 | 0.024076 | 0.048005 | 0.95351 |
| --- | --- | --- | --- | --- | --- | --- |
| SULF2 | SULF2 | 16 | -0.02509 | 0.008709 | 0.003962 | 0.975219 |
| QSOX2 | QSOX2 | 255 | 0.001919 | 0.000455 | 2.52E-05 | 1.00192 |
| PLVAP | PLVAP | 14 | -0.00826 | 0.002907 | 0.004507 | 0.991777 |
| TRAPPC5 | TPPC5 | 8 | -0.01547 | 0.007695 | 0.044337 | 0.984646 |
| GPC1 | Glypican | 81 | 0.002089 | 0.001063 | 0.049395 | 1.002092 |
| CRIM1 | CRIM1 | 3 | -0.01423 | 0.00581 | 0.014311 | 0.985871 |
| DPEP1 | DPEP1 | 128 | -0.00271 | 0.000861 | 0.001614 | 0.997289 |
| PLA2G2C | PA2GC | 3 | -0.02371 | 0.009371 | 0.011402 | 0.976568 |
| BATF3 | BATF3 | 11 | -0.00714 | 0.002497 | 0.004234 | 0.992884 |
| GLT8D1 | GL8D1 | 77 | -0.00391 | 0.001458 | 0.007292 | 0.996096 |
| LCT | LPH | 282 | -0.00174 | 0.000406 | 1.83E-05 | 0.998261 |
| HAVCR1 | TIM | 78 | -0.00314 | 0.001095 | 0.004147 | 0.996865 |
| CNTNAP5 | CNTP5 | 13 | -0.00737 | 0.003008 | 0.014295 | 0.992659 |
| UMODL1 | UROL1 | 7 | -0.0149 | 0.006099 | 0.014551 | 0.985209 |
| MASP1 | MASP3 | 3 | -0.01874 | 0.005381 | 0.000496 | 0.981431 |
| CCL26 | Eotaxin | 10 | -0.0165 | 0.006703 | 0.013834 | 0.983636 |
| IFNAR1 | IFN | 189 | -0.00206 | 0.000663 | 0.001899 | 0.997942 |
| UBE2G2 | UB2G2 | 43 | -0.02245 | 0.007649 | 0.003337 | 0.977803 |
| PLXDC1 | PXDC1 | 78 | 0.004673 | 0.001414 | 0.000952 | 1.004684 |
| ERP27 | ERP27 | 3 | -0.03151 | 0.009407 | 0.00081 | 0.968984 |
| TTC9B | TTC9B | 20 | 0.005352 | 0.002673 | 0.045213 | 1.005367 |
| ACVR2B | Activin | 6 | -0.01574 | 0.00512 | 0.002114 | 0.984384 |
| LMAN2 | Lectin | 13 | 0.011731 | 0.005275 | 0.026158 | 1.0118 |
| MNX1 | MNX1 | 6 | -0.01353 | 0.004533 | 0.002846 | 0.986565 |
| SYT2 | SYT2 | 5 | -0.01149 | 0.005301 | 0.03021 | 0.988578 |
| ESRRA | ERRalpha | 6 | -0.01624 | 0.006526 | 0.012821 | 0.983891 |
| ADAM15 | ADA15 | 7 | -0.02587 | 0.009872 | 0.008777 | 0.974462 |

GENE,gene;PRO,protein;BETA,beta;SE, standarderror;P, pvalue;OR,Odds Ratio

| **Supplementary** **Table** **S4:** Heterogeneity and pleiotropy in MR analyses. | | | | | | | | | | |
| --- | --- | --- | --- | --- | --- | --- | --- | --- | --- | --- |
| EXPOSURE | OUTCOME | METHOD | NO. OF SNPs | HETEROGENEITY | | | HORIZONTAL PLEIOTROPY | | | |
| Q | Q DEGREES OF | Q P-VALUE | MR-EGGER REGRESSION | | | MR-PRESSO |
| EGGER INTERCEPT | SE | P-VALUE | GLOBAL TEST P-VALUE |
| LCN2 | Asthma | MR Egger | 25 | 168. 1041 | 23 | 4.85E-24 | -0.00113553 | 0.001339 | 0.405032 | <0.001 |
| LCN2 | Asthma | Inverse variance weighted | 25 | 173.3632 | 24 | 1.35E-24 | -0.00113553 | 0.001339 | 0.405032 | <0.001 |
| IL18RAP | Asthma | MR Egger | 7 | 1.934085 | 5 | 0.85818838 | 0.001464346 | 0.000866 | 0. 151689 | 0.51 |
| IL18RAP | Asthma | Inverse variance weighted | 7 | 4.792468 | 6 | 0.570692948 | 0.001464346 | 0.000866 | 0. 151689 | 0.51 |
| SIGLEC9 | Asthma | MR Egger | 223 | 278.7499 | 221 | 0.005090351 | 0.000201096 | 0.00014 | 0. 153004 | 0.003 |
| SIGLEC9 | Asthma | Inverse variance weighted | 223 | 281.3434 | 222 | 0.004276324 | 0.000201096 | 0.00014 | 0. 153004 | 0.003 |
| FGF2 | Asthma | MR Egger | 154 | 315.4536 | 152 | 1.68E- 13 | -4.42E-05 | 0.000243 | 0.855958 | <0.001 |
| FGF2 | Asthma | Inverse variance weighted | 154 | 315.5223 | 153 | 2.39E- 13 | -4.42E-05 | 0.000243 | 0.855958 | <0.001 |
| IL13 | Asthma | MR Egger | 11 | 35.05277 | 9 | 5.83E-05 | 0.001161901 | 0.001318 | 0.400815 | <0.001 |
| IL13 | Asthma | Inverse variance weighted | 11 | 38.08131 | 10 | 3.67E-05 | 0.001161901 | 0.001318 | 0.400815 | <0.001 |
| AURKA | Asthma | MR Egger | 15 | 34. 1738 | 13 | 0.00113251 | 0.002151494 | 0.001065 | 0.064409 | <0.001 |
| AURKA | Asthma | Inverse variance weighted | 15 | 44.90722 | 14 | 4.22E-05 | 0.002151494 | 0.001065 | 0.064409 | <0.001 |
| CD33 | Asthma | MR Egger | 246 | 376. 1681 | 244 | 1. 10E-07 | -0.000221807 | 0.000148 | 0. 135856 | <0.001 |
| CD33 | Asthma | Inverse variance weighted | 246 | 379.62 | 245 | 7.33E-08 | -0.000221807 | 0.000148 | 0. 135856 | <0.001 |
| TMPRSS15 | Asthma | MR Egger | 8 | 27.91108 | 6 | 9.77E-05 | 0.0018329 | 0.001866 | 0.363877 | 0.002 |
| TMPRSS15 | Asthma | Inverse variance weighted | 8 | 32.39992 | 7 | 3.42E-05 | 0.0018329 | 0.001866 | 0.363877 | 0.002 |
| KREMEN2 | Asthma | MR Egger | 3 | 0.013163 | 1 | 0.908658371 | 0.001940157 | 0.001487 | 0.416369 |  |
| KREMEN2 | Asthma | Inverse variance weighted | 3 | 1.714857 | 2 | 0.424251649 | 0.001940157 | 0.001487 | 0.416369 |  |
| CA6 | Asthma | MR Egger | 178 | 337.2245 | 176 | 3. 15E- 12 | 0.000326413 | 0.000203 | 0. 110121 | <0.001 |
| CA6 | Asthma | Inverse variance weighted | 178 | 342. 165 | 177 | 1.31E- 12 | 0.000326413 | 0.000203 | 0. 110121 | <0.001 |
| CD207 | Asthma | MR Egger | 6 | 1. 143597 | 4 | 0.887294751 | 0.001224294 | 0.000911 | 0.249995 | 0.723 |
| CD207 | Asthma | Inverse variance weighted | 6 | 2.951046 | 5 | 0.707533125 | 0.001224294 | 0.000911 | 0.249995 | 0.723 |
| PLK1 | Asthma | MR Egger | 3 | 1.719438 | 1 | 0. 189765439 | -0.001281397 | 0.002297 | 0.676071 |  |
| PLK1 | Asthma | Inverse variance weighted | 3 | 2.25446 | 2 | 0.323929261 | -0.001281397 | 0.002297 | 0.676071 |  |
| PTPN2 | Asthma | MR Egger | 12 | 97.05136 | 10 | 2. 12E- 16 | -0.00042604 | 0.00199 | 0.834756 | <0.001 |
| PTPN2 | Asthma | Inverse variance weighted | 12 | 97.49632 | 11 | 5.58E- 16 | -0.00042604 | 0.00199 | 0.834756 | <0.001 |
| CXCL8 | Asthma | MR Egger | 6 | 32.8234 | 4 | 1.30E-06 | -0.000443552 | 0.003432 | 0.903407 | <0.001 |
| CXCL8 | Asthma | Inverse variance weighted | 6 | 32.96046 | 5 | 3.83E-06 | -0.000443552 | 0.003432 | 0.903407 | <0.001 |
| B2M | Asthma | MR Egger | 52 | 791. 1791 | 50 | 5.83E- 134 | 0.000719955 | 0.001501 | 0.633489 | <0.001 |
| B2M | Asthma | Inverse variance weighted | 52 | 794.8212 | 51 | 4.23E- 134 | 0.000719955 | 0.001501 | 0.633489 | <0.001 |
| SERPINA1 | Asthma | MR Egger | 129 | 167.0651 | 127 | 0.009892117 | 2.46E-05 | 0.000167 | 0.883405 | 0.009 |
| SERPINA1 | Asthma | Inverse variance weighted | 129 | 167.0935 | 128 | 0.01154414 | 2.46E-05 | 0.000167 | 0.883405 | 0.009 |
| MMEL1 | Asthma | MR Egger | 3 | 0.90721 | 1 | 0.340855831 | 0.00174161201086101 | 0.001473 | 0.446905 |  |
| MMEL1 | Asthma | Inverse variance weighted | 3 | 2.30538 | 2 | 0.315786155 | 0.00174161201086101 | 0.001473 | 0.446905 |  |
| TEK | Asthma | MR Egger | 67 | 235.4026 | 65 | 3.80E-21 | -0.00044828 | 0.000371 | 0.231507 | <0.001 |
| TEK | Asthma | Inverse variance weighted | 67 | 240.6856 | 66 | 1.05E-21 | -0.00044828 | 0.000371 | 0.231507 | <0.001 |
| HSPA1A | Asthma | MR Egger | 22 | 606.032 | 20 | 1.54E- 115 | 0.00243755 | 0.002996 | 0.425448 | <0.001 |
| HSPA1A | Asthma | Inverse variance weighted | 22 | 626.0905 | 21 | 5. 17E- 119 | 0.00243755 | 0.002996 | 0.425448 | <0.001 |
| CCL24 | Asthma | MR Egger | 15 | 112.6927 | 13 | 5.54E- 18 | 0.000123267 | 0.001776 | 0.94573 | <0.001 |
| CCL24 | Asthma | Inverse variance weighted | 15 | 112.7344 | 14 | 1.65E- 17 | 0.000123267 | 0.001776 | 0.94573 | <0.001 |
| CFB | Asthma | MR Egger | 136 | 1393.002 | 134 | 2.84E-208 | 0.000526383 | 0.000536 | 0.328226 | <0.001 |
| CFB | Asthma | Inverse variance weighted | 136 | 1403.012 | 135 | 9.91E-210 | 0.000526383 | 0.000536 | 0.328226 | <0.001 |
| GZMB | Asthma | MR Egger | 27 | 522.9741 | 25 | 1.32E-94 | 0.001170045 | 0.001859 | 0.534736 | <0.001 |
| GZMB | Asthma | Inverse variance weighted | 27 | 531.2635 | 26 | 1. 17E-95 | 0.001170045 | 0.001859 | 0.534736 | <0.001 |
| XCL1 | Asthma | MR Egger | 5 | 0.811359 | 3 | 0.846748214 | 0.001328828 | 0.000919 | 0.243961 | 0.511 |
| XCL1 | Asthma | Inverse variance weighted | 5 | 2.902188 | 4 | 0.574325166 | 0.001328828 | 0.000919 | 0.243961 | 0.511 |
| IGF1R | Asthma | MR Egger | 34 | 42.06216 | 32 | 0. 109852249 | 0.0005182 | 0.000324 | 0. 119865 | 0.098 |
| IGF1R | Asthma | Inverse variance weighted | 34 | 45.41886 | 33 | 0.073490467 | 0.0005182 | 0.000324 | 0. 119865 | 0.098 |
| PSMA2 | Asthma | MR Egger | 21 | 375.5877 | 19 | 5. 15E-68 | -0.000850309 | 0.001966 | 0.670182 | <0.001 |
| PSMA2 | Asthma | Inverse variance weighted | 21 | 379.2869 | 20 | 4.00E-68 | -0.000850309 | 0.001966 | 0.670182 | <0.001 |
| FCRL3 | Asthma | MR Egger | 148 | 240.2703 | 146 | 1.45E-06 | 0.00013133 | 0.000233 | 0.574459 | <0.001 |
| FCRL3 | Asthma | Inverse variance weighted | 148 | 240.7915 | 147 | 1.69E-06 | 0.00013133 | 0.000233 | 0.574459 | <0.001 |
| CCL19 | Asthma | MR Egger | 42 | 694.2625 | 40 | 2.83E- 120 | -0.00137108855697115 | 0.001148 | 0.239547 | <0.001 |
| CCL19 | Asthma | Inverse variance weighted | 42 | 719.0028 | 41 | 9.95E- 125 | -0.00137108855697115 | 0.001148 | 0.239547 | <0.001 |
| ATP5B | Asthma | MR Egger | 28 | 491.9193 | 26 | 1.63E-87 | -0.002359256 | 0.001936 | 0.233917 | <0.001 |
| ATP5B | Asthma | Inverse variance weighted | 28 | 520.0178 | 27 | 1. 14E-92 | -0.002359256 | 0.001936 | 0.233917 | <0.001 |
| HPGD | Asthma | MR Egger | 10 | 5.873561 | 8 | 0.661392476 | 1.34E-05 | 0.000444 | 0.976702 | 0.785 |
| HPGD | Asthma | Inverse variance weighted | 10 | 5.874469 | 9 | 0.752413275 | 1.34E-05 | 0.000444 | 0.976702 | 0.785 |
| UCHL1 | Asthma | MR Egger | 30 | 22.08758 | 28 | 0.777220333 | 8. 19E-05 | 0.000259 | 0.754226 | 0.846 |
| UCHL1 | Asthma | Inverse variance weighted | 30 | 22. 18754 | 29 | 0.812342129 | 8. 19E-05 | 0.000259 | 0.754226 | 0.846 |
| SPTAN1 | Asthma | MR Egger | 3 | 0217808324 | 1 | 0.956161785 | 0.001920282 | 0.001208 | 0.357458 |  |
| SPTAN1 | Asthma | Inverse variance weighted | 3 | 2.530311 | 2 | 0.282195477 | 0.001920282 | 0.001208 | 0.357458 |  |
| JAG1 | Asthma | MR Egger | 16 | 34.00121 | 14 | 0.002061593 | 0.000449882 | 0.000725 | 0.544762 | 0.005 |
| JAG1 | Asthma | Inverse variance weighted | 16 | 34.93693 | 15 | 0.002510384 | 0.000449882 | 0.000725 | 0.544762 | 0.005 |
| MICB | Asthma | MR Egger | 322 | 2105.934 | 320 | 7.38E-260 | -9. 16E-05 | 0.000254 | 0.718528 | <0.001 |
| MICB | Asthma | Inverse variance weighted | 322 | 2106.79 | 321 | 1.32E-259 | -9. 16E-05 | 0.000254 | 0.718528 | <0.001 |
| TGFBR2 | Asthma | MR Egger | 6 | 0.89919 | 4 | 0.924676928 | 0.000982073 | 0.000765 | 0.268391 | 0.699 |
| TGFBR3 | Asthma | Inverse variance weighted | 6 | 2.548483 | 5 | 0.769176328 | 0.000982073 | 0.000765 | 0.268391 | 0.699 |
| UNC5C | Asthma | MR Egger | 27 | 13.31095 | 25 | 0.972457643 | 0.000486765 | 0.000458 | 0.298117 | 0.976 |
| UNC5C | Asthma | Inverse variance weighted | 27 | 14.44009 | 26 | 0.966734266 | 0.000486765 | 0.000458 | 0.298117 | 0.976 |
| GCKR | Asthma | MR Egger | 13 | 39.93121 | 11 | 3.68E-05 | 0.000928493 | 0.001363 | 0.509896 | 0.001 |
| GCKR | Asthma | Inverse variance weighted | 13 | 41.61518 | 12 | 3.87E-05 | 0.000928493 | 0.001363 | 0.509896 | 0.001 |
| STK17B | Asthma | MR Egger | 8 | 80.91455 | 6 | 2.31E- 15 | -0.002120091 | 0.003013 | 0.507968 | <0.001 |
| STK17B | Asthma | Inverse variance weighted | 8 | 87.59348 | 7 | 3.86E- 16 | -0.002120091 | 0.003013 | 0.507968 | <0.001 |
| GPC6 | Asthma | MR Egger | 20 | 11.74051 | 18 | 0.860340846 | 0.000188403 | 0.000296 | 0.53269 | 0.905 |
| GPC6 | Asthma | Inverse variance weighted | 20 | 12. 14519 | 19 | 0.879325928 | 0.000188403 | 0.000296 | 0.53269 | 0.905 |
| IL17RC | Asthma | MR Egger | 3 | 4. 164634 | 1 | 0.041276334 | 0.001887856 | 0.00278 | 0.620252 |  |
| IL17RC | Asthma | Inverse variance weighted | 3 | 6.084825 | 2 | 0.047719633 | 0.001887856 | 0.00278 | 0.620252 |  |
| SNRPF | Asthma | MR Egger | 25 | 30.78515 | 23 | 0. 128163495 | -0.00065143 | 0.000448 | 0. 159037 | 0.098 |
| SNRPF | Asthma | Inverse variance weighted | 25 | 33.62082 | 24 | 0.091636968 | -0.00065143 | 0.000448 | 0. 159037 | 0.098 |
| ZPLD1 | Asthma | MR Egger | 6 | 52.49838 | 4 | 1.09E- 10 | 0.002560348 | 0.005423 | 0.661421 | <0.001 |
| ZPLD1 | Asthma | Inverse variance weighted | 6 | 55.42427 | 5 | 1.07E- 10 | 0.002560348 | 0.005423 | 0.661421 | <0.001 |
| CTRB2 | Asthma | MR Egger | 341 | 404.5776 | 339 | 0.008253973 | 3.48E-05 | 9.71E-05 | 0.720113 | 0.008 |
| CTRB2 | Asthma | Inverse variance weighted | 341 | 404.7311 | 340 | 0.008253973 | 3.48E-05 | 9.71E-05 | 0.720113 | 0.008 |
| SEMA3B | Asthma | MR Egger | 8 | 51.04782 | 6 | 2.90E-09 | 0.000977708 | 0.00248 | 0.706982 | <0.001 |
| SEMA3B | Asthma | Inverse variance weighted | 8 | 52.37068 | 7 | 4.93E-09 | 0.000977708 | 0.00248 | 0.706982 | <0.001 |
| GZMM | Asthma | MR Egger | 5 | 2.695467 | 3 | 0.440998117 | -0.004474837 | 0.001682 | 0.076338 | 0. 102 |
| GZMM | Asthma | Inverse variance weighted | 5 | 9.771132 | 4 | 0.04446454 | -0.004474837 | 0.001682 | 0.076338 | 0. 102 |
| IFNL3 | Asthma | MR Egger | 12 | 412.3971 | 10 | 2. 16E-82 | -0.002346081 | 0.005229 | 0.663263 | <0.001 |
| IFNL3 | Asthma | Inverse variance weighted | 12 | 420.6974 | 11 | 2.46E-83 | -0.002346081 | 0.005229 | 0.663263 | <0.001 |
| IFNA6 | Asthma | MR Egger | 6 | 24.31421 | 4 | 6.91E-05 | 0.001932639 | 0.002785 | 0.525904 | 0.017 |
| IFNA6 | Asthma | Inverse variance weighted | 6 | 27.24149 | 5 | 5. 12E-05 | 0.001932639 | 0.002785 | 0.525904 | 0.017 |
| CSAG1 | Asthma | MR Egger | 38 | 52.54418 | 36 | 0.036876859 | -0.000391041 | 0.000494 | 0.433595 | 0.052 |
| CSAG1 | Asthma | Inverse variance weighted | 38 | 53.45952 | 37 | 0.039096478 | -0.000391041 | 0.000494 | 0.433595 | 0.052 |
| ACP6 | Asthma | MR Egger | 370 | 651.835 | 368 | 4.22E- 18 | -7.67E-05 | 0.00013 | 0.554855 | <0.001 |
| ACP6 | Asthma | Inverse variance weighted | 370 | 652.4537 | 369 | 4.92E- 18 | -7.67E-05 | 0.00013 | 0.554855 | <0.001 |
| LEPRE1 | Asthma | MR Egger | 10 | 66.95715 | 8 | 1.98E- 11 | 0.000293436 | 0.002733 | 0.917154 | <0.001 |
| LEPRE1 | Asthma | Inverse variance weighted | 10 | 67.05361 | 9 | 5.74E- 11 | 0.000293436 | 0.002733 | 0.917154 | <0.001 |
| MANBA | Asthma | MR Egger | 106 | 178.5954 | 104 | 7.50E-06 | 4.73E-05 | 0.000246 | 0.8478 | <0.001 |
| MANBA | Asthma | Inverse variance weighted | 106 | 178.659 | 105 | 9.83E-06 | 4.73E-05 | 0.000246 | 0.8478 | <0.001 |
| VWA1 | Asthma | MR Egger | 48 | 43.8491 | 46 | 0.562768063 | 0.000139481 | 0.000221 | 0.530515 | 0.572 |
| VWA1 | Asthma | Inverse variance weighted | 48 | 44.24852 | 47 | 0.587203682 | 0.000139481 | 0.000221 | 0.530515 | 0.572 |
| CCDC126 | Asthma | MR Egger | 82 | 103.911 | 80 | 0.037472936 | -0.000188437 | -0.00019 | 0.43638 | 0.037 |
| CCDC126 | Asthma | Inverse variance weighted | 82 | 104.7058 | 81 | 0.039383153 | -0.000188437 | -0.00019 | 0.43638 | 0.037 |
| APOC3 | Asthma | MR Egger | 63 | 746.3705 | 61 | 1.42E- 118 | -0.001351514 | 0.000914 | 0. 144337 | <0.001 |
| APOC3 | Asthma | Inverse variance weighted | 63 | 773. 1283 | 62 | 2.21E- 123 | -0.001351514 | 0.000914 | 0. 144337 | <0.001 |

| PLBD2 | Asthma | MR Egger | 9 | 3.640154 | 7 | 0.82016533 | 0.000654738 | 0.000746 | 0.409371 | 0.793 |
| --- | --- | --- | --- | --- | --- | --- | --- | --- | --- | --- |
| PLBD2 | Asthma | Inverse variance weighted | 9 | 4.409983 | 8 | 0.81837002 | 0.000654738 | 0.000746 | 0.409371 | 0.793 |
| SAYSD1 | Asthma | MR Egger | 8 | 23.83116 | 6 | 0.000560948 | 0.001405265 | 0.001741 | 0.450444 | 0.003 |
| SAYSD1 | Asthma | Inverse variance weighted | 8 | 26.41806 | 7 | 0.000423966 | 0.001405265 | 0.001741 | 0.450444 | 0.003 |
| NDNF | Asthma | MR Egger | 10 | 82. 18614 | 8 | 1.77E- 14 | 0.000184212 | 0.002427 | 0.941359 | <0.001 |
| NDNF | Asthma | Inverse variance weighted | 10 | 82.24533 | 9 | 5.78E- 14 | 0.000184212 | 0.002427 | 0.941359 | <0.001 |
| LRP11 | Asthma | MR Egger | 311 | 371.8932 | 309 | 0.008140361 | -8.54E-05 | 0.000115 | 0.45814 | 0.007 |
| LRP11 | Asthma | Inverse variance weighted | 311 | 372.5573 | 310 | 0.00848885 | -8.54E-05 | 0.000115 | 0.45814 | 0.007 |
| CNTNAP2 | Asthma | MR Egger | 95 | 99.45469 | 93 | 0.304540628 | -0.000305397 | 0.000228 | 0. 18347 | 0.316 |
| CNTNAP2 | Asthma | Inverse variance weighted | 95 | 101.3753 | 94 | 0.283398109 | -0.000305397 | 0.000228 | 0. 18347 | 0.316 |
| MRPL52 | Asthma | MR Egger | 5 | 1.202169 | 3 | 0.752484031 | 0.001545624 | 0.001103 | 0.255658 | 0.494 |
| MRPL52 | Asthma | Inverse variance weighted | 5 | 3. 165808 | 4 | 0.530471227 | 0.001545624 | 0.001103 | 0.255658 | 0.494 |
| S100A13 | Asthma | MR Egger | 291 | 507.5914 | 289 | 3.26E- 14 | -2.60E-05 | 0.000157 | 0.868612 | <0.001 |
| S100A13 | Asthma | Inverse variance weighted | 291 | 507.6395 | 290 | 4.30E- 14 | -2.60E-05 | 0.000157 | 0.868612 | <0.001 |
| HLA | Asthma | MR Egger | 85 | 1242.413 | 83 | 4.49E-206 | 0.000138844 | 0.000896 | 0.877182 | <0.001 |
| HLA | Asthma | Inverse variance weighted | 85 | 1242.773 | 84 | 1.47E-205 | 0.000138844 | 0.000896 | 0.877182 | <0.001 |
| IGFBPL1 | Asthma | MR Egger | 3 | 0.010124 | 1 | 0.919854356 | 0.001536407 | 0.001047 | 0.380948 |  |
| IGFBPL1 | Asthma | Inverse variance weighted | 3 | 2. 161488 | 2 | 0.339342981 | 0.001536407 | 0.001047 | 0.380948 |  |
| C1D | Asthma | MR Egger | 7 | 19.67679 | 5 | 0.001436803 | 0.001733751 | 0.001779 | 0.374581 | 0.013 |
| C1D | Asthma | Inverse variance weighted | 7 | 23.41373 | 6 | 0.000669117 | 0.001733751 | 0.001779 | 0.374581 | 0.013 |
| SMR3A | Asthma | MR Egger | 4 | 0.365039 | 2 | 0.833168253 | 0.000637444 | 0.001054 | 0.606805 | 0.894 |
| SMR3A | Asthma | Inverse variance weighted | 4 | 0.73079 | 3 | 0.865939122 | 0.000637444 | 0.001054 | 0.606805 | 0.894 |
| SPTLC1 | Asthma | MR Egger | 4 | 2. 13682 | 2 | 0.343554392 | 0.002262682 | 0.00382 | 0.613638 | 0.614 |
| SPTLC1 | Asthma | Inverse variance weighted | 4 | 2.511764 | 3 | 0.473168809 | 0.002262682 | 0.00382 | 0.613638 | 0.614 |
| ST8SIA2 | Asthma | MR Egger | 3 | 1.508601 | 1 | 0.219352646 | -0.015910556 | 0.008614 | 0.315902 |  |
| ST8SIA2 | Asthma | Inverse variance weighted | 3 | 6.655371 | 2 | 0.035876042 | -0.015910556 | 0.008614 | 0.315902 |  |
| SYT8 | Asthma | MR Egger | 4 | 1.631419 | 2 | 0.442325489 | 0.000872599 | 2119934742 | 0.546314 | 0.535 |
| SYT8 | Asthma | Inverse variance weighted | 4 | 2. 149775 | 3 | 0.541908707 | 0.000872599 | 2119934742 | 0.546314 | 0.535 |
| HRK | Asthma | MR Egger | 10 | 56. 12179 | 8 | 2.67E-09 | 0.00160673 | 0.002109 | 0.468073 | <0.001 |
| HRK | Asthma | Inverse variance weighted | 10 | 60. 19239 | 9 | 1.23E-09 | 0.00160673 | 0.002109 | 0.468073 | <0.001 |
| FTMT | Asthma | MR Egger | 262 | 2408. 15 | 260 | 0 | 0.000289594 | 0.000367 | 0.431364 | <0.001 |
| FTMT | Asthma | Inverse variance weighted | 262 | 2413.902 | 261 | 0 | 0.000289594 | 0.000367 | 0.431364 | <0.001 |
| CD3E | Asthma | MR Egger | 70 | 444.4826 | 68 | 1. 14E-56 | -0.000818825 | 0.000591 | 0. 170403 | <0.001 |
| CD3E | Asthma | Inverse variance weighted | 70 | 457.0316 | 69 | 1.40E-58 | -0.000818825 | 0.000591 | 0. 170403 | <0.001 |
| ALK | Asthma | MR Egger | 4 | 3.031425 | 2 | 0.219651626 | 0.001284222 | 0.001729 | 0.535087 | 0.356 |
| ALK | Asthma | Inverse variance weighted | 4 | 3.867323 | 3 | 0.276151871 | 0.001284222 | 0.001729 | 0.535087 | 0.356 |
| POMGNT1 | Asthma | MR Egger | 4 | 34.92006 | 2 | 2.61E-08 | -0.029566285 | 0.033328 | 0.4686 | 0.068 |
| POMGNT1 | Asthma | Inverse variance weighted | 4 | 48.66136 | 3 | 1.54E- 10 | -0.029566285 | 0.033328 | 0.4686 | 0.068 |
| SULF2 | Asthma | MR Egger | 16 | 161.2952 | 14 | 3.90E-27 | -0.001639332 | 0.001776 | 0.371619 | <0.001 |
| SULF2 | Asthma | Inverse variance weighted | 16 | 171. 1113 | 15 | 1.46E-28 | -0.001639332 | 0.001776 | 0.371619 | <0.001 |
| QSOX2 | Asthma | MR Egger | 255 | 327.8411 | 253 | 0.001052221 | -0.000111658 | 0.000115 | 0.333903 | 0.001 |
| QSOX2 | Asthma | Inverse variance weighted | 255 | 329.0556 | 254 | 0.001041973 | -0.000111658 | 0.000115 | 0.333903 | 0.001 |
| PLVAP | Asthma | MR Egger | 14 | 6.552688 | 12 | 0.885704922 | 0.00139798 | 0.000768 | 0.093915 | 0.706 |
| PLVAP | Asthma | Inverse variance weighted | 14 | 9.861982 | 13 | 0.705179745 | 0.00139798 | 0.000768 | 0.093915 | 0.706 |
| TRAPPC5 | Asthma | MR Egger | 8 | 23.53254 | 6 | 0.000636398 | 0.002243976 | 0.001862 | 0.273571 | 0.003 |
| TRAPPC5 | Asthma | Inverse variance weighted | 8 | 29.22746 | 7 | 0.000131499 | 0.002243976 | 0.001862 | 0.273571 | 0.003 |
| GPC1 | Asthma | MR Egger | 81 | 113. 1768 | 79 | 0.007049819 | 2.58E-05 | 0.000241 | 0.914868 | 0.013 |
| GPC1 | Asthma | Inverse variance weighted | 81 | 113. 1933 | 80 | 0.008636357 | 2.58E-05 | 0.000241 | 0.914868 | 0.013 |
| CRIM1 | Asthma | MR Egger | 3 | 1.407193 | 1 | 0.235523003 | 0.001105469 | 0.001455 | 0.586436 |  |
| CRIM1 | Asthma | Inverse variance weighted | 3 | 2.219157 | 2 | 0.329697968 | 0.001105469 | 0.001455 | 0.586436 |  |
| DPEP1 | Asthma | MR Egger | 128 | 238. 1307 | 126 | 6.36E-09 | -0.00037871 | 0.000239 | 0. 115019 | <0.001 |
| DPEP1 | Asthma | Inverse variance weighted | 128 | 242.8906 | 127 | 2.76E-09 | -0.00037871 | 0.000239 | 0. 115019 | <0.001 |
| PLA2G2C | Asthma | MR Egger | 3 | 5.374752 | 1 | 0.020430247 | -0.000398481 | 0.003921 | 0.935528 |  |
| PLA2G2C | Asthma | Inverse variance weighted | 3 | 5.430254 | 2 | 0.066196537 | -0.000398481 | 0.003921 | 0.935528 |  |
| BATF3 | Asthma | MR Egger | 11 | 10.07307 | 9 | 0.344601853 | 0.000958978 | 0.000829 | 0.277107 | 0.402 |
| BATF3 | Asthma | Inverse variance weighted | 11 | 11.571 | 10 | 0.314792942 | 0.000958978 | 0.000829 | 0.277107 | 0.402 |
| GLT8D1 | Asthma | MR Egger | 77 | 182.2056 | 75 | 6.63E- 11 | 8.40E-05 | 0.000322 | 0.795036 | <0.001 |
| GLT8D1 | Asthma | Inverse variance weighted | 77 | 182.3707 | 76 | 9.96E- 11 | 8.40E-05 | 0.000322 | 0.795036 | <0.001 |
| LCT | Asthma | MR Egger | 282 | 419. 1124 | 280 | 1.35E-07 | 0.000113906 | 0.000126 | 0.367595 | <0.001 |
| LCT | Asthma | Inverse variance weighted | 282 | 420.3314 | 281 | 1.35E-07 | 0.000113906 | 0.000126 | 0.367595 | <0.001 |
| HAVCR1 | Asthma | MR Egger | 78 | 108.2239 | 76 | 0.008951028 | 0.000367473 | 0.000256 | 0. 155033 | 0.01 |
| HAVCR1 | Asthma | Inverse variance weighted | 78 | 111. 1614 | 77 | 0.006593722 | 0.000367473 | 0.000256 | 0. 155033 | 0.01 |
| CNTNAP5 | Asthma | MR Egger | 13 | 11.21554 | 11 | 0.425386673 | 0.000949595 | 0.000561 | 0. 118329 | 0.318 |
| CNTNAP5 | Asthma | Inverse variance weighted | 13 | 14. 14189 | 12 | 0.291739203 | 0.000949595 | 0.000561 | 0. 118329 | 0.318 |
| UMODL1 | Asthma | MR Egger | 7 | 9.058338 | 5 | 0. 106759746 | 0.001129729 | 0.00115 | 0.370877 | 0. 16 |
| UMODL1 | Asthma | Inverse variance weighted | 7 | 10.80792 | 6 | 0.09449734 | 0.001129729 | 0.00115 | 0.370877 | 0. 16 |
| MASP1 | Asthma | MR Egger | 3 | 0.633265 | 1 | 0.426160108 | 0.001486275 | 0.001978 | 0.589836 |  |
| MASP1 | Asthma | Inverse variance weighted | 3 | 1. 197604 | 2 | 0.549469608 | 0.001486275 | 0.001978 | 0.589836 |  |
| CCL26 | Asthma | MR Egger | 10 | 31.25514 | 8 | 0.000126544 | -0.000442498 | 0.001465 | 0.770277 | 0.008 |
| CCL26 | Asthma | Inverse variance weighted | 10 | 31.61171 | 9 | 0.000232356 | -0.000442498 | 0.001465 | 0.770277 | 0.008 |
| IFNAR1 | Asthma | MR Egger | 189 | 292.2509 | 187 | 1.32E-06 | -0.000248072 | 0.000149 | 0.097001 | <0.001 |
| IFNAR1 | Asthma | Inverse variance weighted | 189 | 296.5988 | 188 | 7.30E-07 | -0.000248072 | 0.000149 | 0.097001 | <0.001 |
| UBE2G2 | Asthma | MR Egger | 43 | 899.2788 | 41 | 5.51E- 162 | -0.003100438 | 0.001853 | 0. 10193 | <0.001 |
| UBE2G2 | Asthma | Inverse variance weighted | 43 | 960.6741 | 42 | 4.52E- 174 | -0.003100438 | 0.001853 | 0. 10193 | <0.001 |
| PLXDC1 | Asthma | MR Egger | 78 | 145.8027 | 76 | 2.62E-06 | 0.000654436 | 0.000332 | 0.052341 | <0.001 |
| PLXDC1 | Asthma | Inverse variance weighted | 78 | 153.2571 | 77 | 5.50E-07 | 0.000654436 | 0.000332 | 0.052341 | <0.001 |
| ERP27 | Asthma | MR Egger | 3 | 3.427707 | 1 | 0.064111047 | -0.001020247 | 0.011978 | 0.945906 |  |
| ERP27 | Asthma | Inverse variance weighted | 3 | 3.452575 | 2 | 0. 17794383 | -0.001020247 | 0.011978 | 0.945906 |  |
| TTC9B | Asthma | MR Egger | 20 | 25.79494 | 18 | 0. 104539812 | -0.000861488 | 0.000606 | 0. 172533 | 0.09 |
| TTC9B | Asthma | Inverse variance weighted | 20 | 28.68687 | 19 | 0.071072687 | -0.000861488 | 0.000606 | 0. 172533 | 0.09 |
| ACVR2B | Asthma | MR Egger | 6 | 6. 191389 | 4 | 0. 185303897 | 0.000449109 | 0.001034 | 0.686533 | 0.412 |
| ACVR2B | Asthma | Inverse variance weighted | 6 | 6.483213 | 5 | 0.261996117 | 0.000449109 | 0.001034 | 0.686533 | 0.412 |
| LMAN2 | Asthma | MR Egger | 13 | 33.06014 | 11 | 0.000514485 | -0.001263314 | 0.001146 | 0.293914 | <0.001 |
| LMAN2 | Asthma | Inverse variance weighted | 13 | 36.71119 | 12 | 0.000248809 | -0.001263314 | 0.001146 | 0.293914 | <0.001 |
| MNX1 | Asthma | MR Egger | 6 | 3.636279 | 4 | 0.457461497 | 0.000550948 | 0.000946 | 0.591388 | 0.602 |
| MNX1 | Asthma | Inverse variance weighted | 6 | 3.97577 | 5 | 0.552909679 | 0.000550948 | 0.000946 | 0.591388 | 0.602 |
| SYT2 | Asthma | MR Egger | 5 | 2.630187 | 3 | 0.452221974 | 0.001695773 | 0.001115 | 0.225491 | 0.329 |
| SYT2 | Asthma | Inverse variance weighted | 5 | 4.945088 | 4 | 0.292978354 | 0.001695773 | 0.001115 | 0.225491 | 0.329 |
| ESRRA | Asthma | MR Egger | 6 | 9.574126 | 4 | 0.048246203 | 0.00111624 | 0.001715 | 0.550554 | 0. 132 |
| ESRRA | Asthma | Inverse variance weighted | 6 | 10.58849 | 5 | 0.060177773 | 0.00111624 | 0.001715 | 0.550554 | 0. 132 |
| ADAM15 | Asthma | MR Egger | 7 | 22.60958 | 5 | 0.000400789 | 0.002009989 | 0.002161 | 0.394958 | 0.003 |
| ADAM15 | Asthma | Inverse variance weighted | 7 | 26.52236 | 6 | 0.000177891 | 0.002009989 | 0.002161 | 0.394958 | 0.003 |
| HOGA1 | Asthma | MR Egger | 7 | 3.865136 | 5 | 0.568992027 | 0.00121884 | 0.000844 | 0.208483 | 0.518 |
| HOGA1 | Asthma | Inverse variance weighted | 7 | 5.948756 | 6 | 0.428954963 | 0.00121884 | 0.000844 | 0.208483 | 0.518 |
| NCF2 | Asthma | MR Egger | 63 | 60. 19914 | 61 | 0.504929108 | 1.21E-05 | 0.000173 | 0.944635 | 0.554 |
| NCF2 | Asthma | Inverse variance weighted | 63 | 60.20401 | 62 | 0.540942991 | 1.21E-05 | 0.000173 | 0.944635 | 0.554 |
| AGA | Asthma | MR Egger | 9 | 4.903568 | 7 | 0.671730127 | -0.000823106 | 0.000844 | 0.362102 | 0.731 |
| AGA | Asthma | Inverse variance weighted | 9 | 5.85394 | 8 | 0.663588784 | -0.000823106 | 0.000844 | 0.362102 | 0.731 |
| TMEM190 | Asthma | MR Egger | 244 | 244.3509 | 242 | 0.445595449 | 0.000191592 | 0.000124 | 0. 123058 | 0.432 |
| TMEM190 | Asthma | Inverse variance weighted | 244 | 246.7688 | 243 | 0.420628335 | 0.000191592 | 0.000124 | 0. 123058 | 0.432 |
| PSMB6 | Asthma | MR Egger | 5 | 0.296692 | 3 | 0.960649487 | 0.001278592 | 0.000936 | 0.265159 | 0.659 |
| PSMB6 | Asthma | Inverse variance weighted | 5 | 2. 164299 | 4 | 0.705570382 | 0.001278592 | 0.000936 | 0.265159 | 0.659 |
| LYSMD3 | Asthma | MR Egger | 3 | 1.575898 | 1 | 0.209352534 | 0.00106759 | 0.001566 | 0.619088 |  |
| LYSMD3 | Asthma | Inverse variance weighted | 3 | 2.308233 | 2 | 0.315336089 | 0.00106759 | 0.001566 | 0.619088 |  |
| SUDS3 | Asthma | MR Egger | 13 | 26.68101 | 11 | 0.005133079 | 0.002270483 | 0.00109 | 0.061464 | 0.001 |
| SUDS3 | Asthma | Inverse variance weighted | 13 | 37. 19708 | 12 | 0.000207546 | 0.002270483 | 0.00109 | 0.061464 | 0.001 |
| IL20RB | Asthma | MR Egger | 26 | 429.4102 | 24 | 6.71E-76 | -0.002887889 | 6593280464 | 0.28829 | <0.001 |
| IL20RB | Asthma | Inverse variance weighted | 26 | 450.51 | 25 | 1.30E-79 | -0.002887889 | 6593280464 | 0.28829 | <0.001 |
| CHRD | Asthma | MR Egger | 27 | 477.6005 | 25 | 3.33E-85 | -0.002173847 | 0.002482 | 0.389426 | <0.001 |
| CHRD | Asthma | Inverse variance weighted | 27 | 492.2569 | 26 | 1.39E-87 | -0.002173847 | 0.002482 | 0.389426 | <0.001 |
| REPIN1 | Asthma | MR Egger | 8 | 4.549102 | 6 | 0.602798491 | 0.001130306 | 0.000722 | 0. 168523 | 0.4 |

| REPIN1 | Asthma | Inverse variance weighted | 8 | 6.999637 | 7 | 0.428917628 | 0.001130306 | 0.000722 | 0. 168523 | 0.4 |
| --- | --- | --- | --- | --- | --- | --- | --- | --- | --- | --- |
| ANXA10 | Asthma | MR Egger | 9 | 62.82756 | 7 | 4. 10E- 11 | 0.001251239 | 0.002244 | 0.594504 | <0.001 |
| ANXA10 | Asthma | Inverse variance weighted | 9 | 65.61797 | 8 | 3.64E- 11 | 0.001251239 | 0.002244 | 0.594504 | <0.001 |
| AK5 | Asthma | MR Egger | 12 | 67.74549 | 10 | 1.21E- 10 | 6.77E-05 | 0.001632 | 0.967698 | <0.001 |
| AK5 | Asthma | Inverse variance weighted | 12 | 67.75716 | 11 | 3.25E- 10 | 6.77E-05 | 0.001632 | 0.967698 | <0.001 |
| NAB1 | Asthma | MR Egger | 5 | 0.057184 | 3 | 0.996424907 | -0.001040658 | 0.001184 | 0.44415 | 0.939 |
| NAB1 | Asthma | Inverse variance weighted | 5 | 0.8297 | 4 | 0.934422594 | -0.001040658 | 0.001184 | 0.44415 | 0.939 |
| GABBR2 | Asthma | MR Egger | 11 | 15.96475 | 9 | 0.067621293 | -0.000827668 | 0.001006 | 0.431789 | 0.086 |
| GABBR2 | Asthma | Inverse variance weighted | 11 | 17. 16616 | 10 | 0.070767248 | -0.000827668 | 0.001006 | 0.431789 | 0.086 |
| CGA | Asthma | MR Egger | 12 | 415.8881 | 10 | 3.90E-83 | -0.002728494 | 0.006887 | 0.700305 | <0.001 |
| CGA | Asthma | Inverse variance weighted | 12 | 422.4153 | 11 | 1.06E-83 | -0.002728494 | 0.006887 | 0.700305 | <0.001 |
| NCF4 | Asthma | MR Egger | 20 | 486.4857 | 18 | 7.21E-92 | -3. 17E-05 | 0.00264 | 0.990557 | <0.001 |
| NCF4 | Asthma | Inverse variance weighted | 20 | 486.4896 | 19 | 3.80E-91 | -3. 17E-05 | 0.00264 | 0.990557 | <0.001 |
| TRAPPC3 | Asthma | MR Egger | 48 | 871.347 | 46 | 6.65E- 153 | -0.002743133 | 0.001486 | 0.071287 | <0.001 |
| TRAPPC3 | Asthma | Inverse variance weighted | 48 | 935.9191 | 47 | 1.38E- 165 | -0.002743133 | 0.001486 | 0.071287 | <0.001 |
| AKT2 | Asthma | MR Egger | 45 | 103.5635 | 43 | 6.58E-07 | 0.000292819 | 0.000324 | 0.37139 | <0.001 |
| AKT2 | Asthma | Inverse variance weighted | 45 | 105.5288 | 44 | 5.72E-07 | 0.000292819 | 0.000324 | 0.37139 | <0.001 |
| MAD2L1 | Asthma | MR Egger | 12 | 31.31233 | 10 | 0.000520931 | 0.001517577 | 0.001449 | 0.319464 | <0.001 |
| MAD2L1 | Asthma | Inverse variance weighted | 12 | 34.74902 | 11 | 0.000272555 | 0.001517577 | 0.001449 | 0.319464 | <0.001 |
| IFNA4 | Asthma | MR Egger | 4 | 2.370196 | 2 | 0.305716201 | 0.001774436 | 0.001755 | 0.418397 | 0.39 |
| IFNA4 | Asthma | Inverse variance weighted | 4 | 3.581775 | 3 | 0.310310024 | 0.001774436 | 0.001755 | 0.418397 | 0.39 |
| GLIPR2 | Asthma | MR Egger | 45 | 65.47153 | 43 | 0.015179633 | 1.31E-05 | 0.000368 | 0.971735 | 0.028 |
| GLIPR2 | Asthma | Inverse variance weighted | 45 | 65.47346 | 44 | 0.019462489 | 1.31E-05 | 0.000368 | 0.971735 | 0.028 |
| EPHB4 | Asthma | MR Egger | 42 | 51.86503 | 40 | 0.099013186 | 0.000498232 | 0.000285 | 0.087843 | 0.055 |
| EPHB4 | Asthma | Inverse variance weighted | 42 | 55.83449 | 41 | 0.061078828 | 0.000498232 | 0.000285 | 0.087843 | 0.055 |
| FLT4 | Asthma | MR Egger | 181 | 225.9631 | 179 | 0.009964034 | -9.27E-05 | 0.00016 | 0.564087 | 0.007 |
| FLT4 | Asthma | Inverse variance weighted | 181 | 226.3846 | 180 | 0.010838851 | -9.27E-05 | 0.00016 | 0.564087 | 0.007 |
| LGR5 | Asthma | MR Egger | 8 | 18.56293 | 6 | 0.004969128 | 0.002560081 | 0.001463 | 0. 130809 | 0.004 |
| LGR5 | Asthma | Inverse variance weighted | 8 | 28.03065 | 7 | 0.000217098 | 0.002560081 | 0.001463 | 0. 130809 | 0.004 |
| BTLA | Asthma | MR Egger | 6 | 1.513077 | 4 | 0.824322629 | 0.001560836 | 0.000939 | 0. 171884 | 0.519 |
| BTLA | Asthma | Inverse variance weighted | 6 | 4.274721 | 5 | 0.510578111 | 0.001560836 | 0.000939 | 0. 171884 | 0.519 |
| TLR1 | Asthma | MR Egger | 32 | 645.4988 | 30 | 1.08E- 116 | 0.000514161597873489 | 0.001718 | 0.766737 | <0.001 |
| TLR1 | Asthma | Inverse variance weighted | 32 | 647.4269 | 31 | 2.02E- 116 | 0.000514161597873489 | 0.001718 | 0.766737 | <0.001 |
| RNASET2 | Asthma | MR Egger | 73 | 177.3584 | 71 | 4.52E- 11 | -0.000226702 | 0.000313 | 0.471838 | <0.001 |
| RNASET2 | Asthma | Inverse variance weighted | 73 | 178.6654 | 72 | 4.85E- 11 | -0.000226702 | 0.000313 | 0.471838 | <0.001 |
| SULT1E1 | Asthma | MR Egger | 3 | 1.693117 | 1 | 0. 193190613 | 0.000598884 | 0.001447 | 0.750193 |  |
| SULT1E1 | Asthma | Inverse variance weighted | 3 | 1.983111 | 2 | 0.370999079 | 0.000598884 | 0.001447 | 0.750193 |  |
| ZADH2 | Asthma | MR Egger | 4 | 2.075238 | 2 | 0.354297324 | 0.000768597 | 0.001368 | 0.630854 | 0.597 |
| ZADH2 | Asthma | Inverse variance weighted | 4 | 2.402643 | 3 | 0.493142876 | 0.000768597 | 0.001368 | 0.630854 | 0.597 |
| SYNJ2BP | Asthma | MR Egger | 4 | 0.855219 | 2 | 0.652065996 | 0.001184433 | 0.001028 | 0.368212 | 0.547 |
| SYNJ2BP | Asthma | Inverse variance weighted | 4 | 2. 18387 | 3 | 0.535132538 | 0.001184433 | 0.001028 | 0.368212 | 0.547 |
| DCUN1D1 | Asthma | MR Egger | 45 | 276.5998 | 43 | 7.05E-36 | -0.000117556 | 0.000814 | 0.885887 | <0.001 |
| DCUN1D1 | Asthma | Inverse variance weighted | 45 | 276.7339 | 44 | 1.71E-35 | -0.000117556 | 0.000814 | 0.885887 | <0.001 |
| CD46 | Asthma | MR Egger | 26 | 30.74082 | 24 | 0. 161397272 | 5.54E-05 | 0.000489 | 0.910761 | 0.224 |
| CD46 | Asthma | Inverse variance weighted | 26 | 30.75725 | 25 | 0. 197183222 | 5.54E-05 | 0.000489 | 0.910761 | 0.224 |
| TPP1 | Asthma | MR Egger | 36 | 44.49817 | 34 | 0. 107374712 | 0.000291779 | 0.000343 | 0.400605 | 0. 12 |
| TPP1 | Asthma | Inverse variance weighted | 36 | 45.44646 | 35 | 0. 111173599 | 0.000291779 | 0.000343 | 0.400605 | 0. 12 |
| BTN3A3 | Asthma | MR Egger | 362 | 1833.46 | 360 | 1.44E- 195 | -0.000316787 | 0.00022 | 0. 150451 | <0.001 |
| BTN3A3 | Asthma | Inverse variance weighted | 362 | 4.03547405 | 361 | 4.60E- 197 | -0.000316787 | 0.00022 | 0. 150451 | <0.001 |
| GMNN | Asthma | MR Egger | 9 | 67. 1565 | 7 | 5.54E- 12 | 0.000862269 | 0.002652 | 0.75459 | <0.001 |
| GMNN | Asthma | Inverse variance weighted | 9 | 68. 17061 | 8 | 1. 14E- 11 | 0.000862269 | 0.002652 | 0.75459 | <0.001 |
| APTX | Asthma | MR Egger | 13 | 9.940102 | 11 | 0.535782989 | 0.000239927 | 0.000736 | 0.750484 | 0.638 |
| APTX | Asthma | Inverse variance weighted | 13 | 10.04643 | 12 | 0.61188731 | 0.000239927 | 0.000736 | 0.750484 | 0.638 |
| TP53I3 | Asthma | MR Egger | 83 | 123.2073 | 81 | 0.001750196 | 0.000375597 | 0.000229 | 0. 105304 | 0.002 |
| TP53I3 | Asthma | Inverse variance weighted | 83 | 127.2883 | 82 | 0.001007131 | 0.000375597 | 0.000229 | 0. 105304 | 0.002 |
| SERF2 | Asthma | MR Egger | 5 | 3.956737 | 3 | 0.266173842 | 0.000860636 | 0.000967 | 0.439217 | 0.319 |
| SERF2 | Asthma | Inverse variance weighted | 5 | 5.000497 | 4 | 0.287246503 | 0.000860636 | 0.000967 | 0.439217 | 0.319 |
| STXBP6 | Asthma | MR Egger | 37 | 34.94585 | 35 | 0.470774617 | 0.000593339 | 0.000339 | 0.088936 | 0.427 |
| STXBP6 | Asthma | Inverse variance weighted | 37 | 38.00727 | 36 | 0.37804732 | 0.000593339 | 0.000339 | 0.088936 | 0.427 |
| COMT | Asthma | MR Egger | 22 | 21.49982 | 20 | 0.368256575 | 0.000549489 | 0.000399 | 0. 183273 | 0.38 |
| COMT | Asthma | Inverse variance weighted | 22 | 23.54259 | 21 | 0.315744428 | 0.000549489 | 0.000399 | 0. 183273 | 0.38 |
| AES | Asthma | MR Egger | 14 | 123.2772 | 12 | 1.37E-20 | 0.000475681 | 0.002089 | 0.823694 | <0.001 |
| AES | Asthma | Inverse variance weighted | 14 | 123.8099 | 13 | 3.55E-20 | 0.000475681 | 0.002089 | 0.823694 | <0.001 |
| TBPL1 | Asthma | MR Egger | 26 | 45.44614 | 24 | 0.005156616 | 0.000704194 | 0.00054 | 0.204847 | 0.004 |
| TBPL1 | Asthma | Inverse variance weighted | 26 | 48.66243 | 25 | 0.003104191 | 0.000704194 | 0.00054 | 0.204847 | 0.004 |
| LCN2 | Sepsis | MR Egger | 23 | 18.02257 | 21 | 0.647575536 | 0.005659426 | 0.011108 | 0.615725 | 0.699 |
| LCN2 | Sepsis | Inverse variance weighted | 23 | 18.28214 | 22 | 0.68913505 | 0.005659426 | 0.011108 | 0.615725 | 0.699 |
| IL18RAP | Sepsis | MR Egger | 13 | 10.48003 | 11 | 0.487793191 | -0.010999385 | 0.016351 | 0.515007 | 0.545 |
| IL18RAP | Sepsis | Inverse variance weighted | 13 | 10.93259 | 12 | 0.534704345 | -0.010999385 | 0.016351 | 0.515007 | 0.545 |
| SIGLEC9 | Sepsis | MR Egger | 235 | 236.7843 | 233 | 0.418704224 | 0.004865276 | 0.002502 | 0.053027 | 0.38 |
| SIGLEC9 | Sepsis | Inverse variance weighted | 235 | 240.6271 | 234 | 0.369097394 | 0.004865276 | 0.002502 | 0.053027 | 0.38 |
| FGF2 | Sepsis | MR Egger | 154 | 181.5485 | 152 | 0.051176338 | 0.001282602 | 0.003815 | 0.737211 | 0.064 |
| FGF2 | Sepsis | Inverse variance weighted | 154 | 181.6834 | 153 | 0.056512535 | 0.001282602 | 0.003815 | 0.737211 | 0.064 |
| IL13 | Sepsis | MR Egger | 15 | 9.731537 | 13 | 0.715726319 | -0.021044783 | 0.013092 | 0. 131965 | 0.513 |
| IL13 | Sepsis | Inverse variance weighted | 15 | 12.31538 | 14 | 0.580991587 | -0.021044783 | 0.013092 | 0. 131965 | 0.513 |
| AURKA | Sepsis | MR Egger | 21 | 10.63951 | 19 | 0.935369829 | -0.010624001 | 0.012929 | 0.421426 | 0.935 |
| AURKA | Sepsis | Inverse variance weighted | 21 | 11.31474 | 20 | 0.937648221 | -0.010624001 | 0.012929 | 0.421426 | 0.935 |
| CD33 | Sepsis | MR Egger | 252 | 233.0587 | 250 | 0.772006648 | -0.003819518 | 0.002411 | 0. 114389 | 0.715 |
| CD33 | Sepsis | Inverse variance weighted | 252 | 235.5687 | 251 | 0.749672982 | -0.003819518 | 0.002411 | 0. 114389 | 0.715 |
| TMPRSS15 | Sepsis | MR Egger | 14 | 7.327389 | 12 | 0.835241876 | -0.015053028 | 0.016744 | 0.386325 | 0.81 |
| TMPRSS15 | Sepsis | Inverse variance weighted | 14 | 8. 135632 | 13 | 0.8346531 | -0.015053028 | 0.016744 | 0.386325 | 0.81 |
| KREMEN2 | Sepsis | MR Egger | 8 | 2.932599 | 6 | 0.81725762 | -0.009656212 | 0.027239 | 0.735094 | 0.819 |
| KREMEN2 | Sepsis | Inverse variance weighted | 8 | 3.058266 | 7 | 0.879560308 | -0.009656212 | 0.027239 | 0.735094 | 0.819 |
| CA6 | Sepsis | MR Egger | 170 | 149.6061 | 168 | 0.842768111 | 0.006010642 | 0.003208 | 0.062682 | 0.827 |
| CA6 | Sepsis | Inverse variance weighted | 170 | 153. 1176 | 169 | 0.803994225 | 0.006010642 | 0.003208 | 0.062682 | 0.827 |
| CD207 | Sepsis | MR Egger | 11 | 1.725006 | 9 | 0.99510815 | -0.007872345 | 0.017084 | 0.655879 | 0.993 |
| CD207 | Sepsis | Inverse variance weighted | 11 | 1.937336 | 10 | 0.996798242 | -0.007872345 | 0.017084 | 0.655879 | 0.993 |
| PLK1 | Sepsis | MR Egger | 5 | 2. 14512 | 3 | 0.54283881 | 0.008819291 | 0.033391 | 0.808789 | 0.74 |
| PLK1 | Sepsis | Inverse variance weighted | 5 | 2.214882 | 4 | 0.696305724 | 0.008819291 | 0.033391 | 0.808789 | 0.74 |
| PTPN2 | Sepsis | MR Egger | 18 | 10.71952 | 16 | 0.826458237 | -0.009928059 | 0.012675 | 0.444909 | 0.784 |
| PTPN2 | Sepsis | Inverse variance weighted | 18 | 11.33303 | 17 | 0.838737214 | -0.009928059 | 0.012675 | 0.444909 | 0.784 |
| CXCL8 | Sepsis | MR Egger | 9 | 2.604773 | 7 | 0.919003133 | -0.007694032 | 0.022962 | 0.747387 | 0.942 |
| CXCL8 | Sepsis | Inverse variance weighted | 9 | 2.717047 | 8 | 0.950841212 | -0.007694032 | 0.022962 | 0.747387 | 0.942 |
| B2M | Sepsis | MR Egger | 68 | 74.85364 | 66 | 0.212996516 | -0.004371477 | 0.006972 | 0.532806 | 0.251 |
| B2M | Sepsis | Inverse variance weighted | 68 | 75.29954 | 67 | 0.227713373 | -0.004371477 | 0.006972 | 0.532806 | 0.251 |
| SERPINA1 | Sepsis | MR Egger | 128 | 127.0882 | 126 | 0.45607219 | 0.001761997 | 0.003135 | 0.575078 | 0.476 |
| SERPINA1 | Sepsis | Inverse variance weighted | 128 | 127.4068 | 127 | 0.473158216 | 0.001761997 | 0.003135 | 0.575078 | 0.476 |
| MMEL1 | Sepsis | MR Egger | 4 | 0.073698 | 2 | 0.963821883 | -0.006585419 | 0.029974 | 0.846487 | 0.984 |
| MMEL1 | Sepsis | Inverse variance weighted | 4 | 0. 121967 | 3 | 0.989076836 | -0.006585419 | 0.029974 | 0.846487 | 0.984 |
| TEK | Sepsis | MR Egger | 71 | 68.4777 | 69 | 0.495112533 | -0.001475669 | 0.00441 | 0.738943 | 0.537 |
| TEK | Sepsis | Inverse variance weighted | 71 | 68.58966 | 70 | 0.525327453 | -0.001475669 | 0.00441 | 0.738943 | 0.537 |
| HSPA1A | Sepsis | MR Egger | 24 | 28.35488 | 22 | 0. 164216432 | 0.002095039 | 0.012634 | 0.869811 | 0.214 |
| HSPA1A | Sepsis | Inverse variance weighted | 24 | 28.39032 | 23 | 0.201380831 | 0.002095039 | 0.012634 | 0.869811 | 0.214 |
| CCL24 | Sepsis | MR Egger | 19 | 8.203684 | 17 | 0.961995287 | -0.015824163 | 0.011894 | 0.200941 | 0.914 |
| CCL24 | Sepsis | Inverse variance weighted | 19 | 9.973796 | 18 | 0.93275829 | -0.015824163 | 0.011894 | 0.200941 | 0.914 |
| CFB | Sepsis | MR Egger | 157 | 189.6014 | 155 | 0.030553449 | 0.002132602 | 0.0036 | 0.554464 | 0.033 |
| CFB | Sepsis | Inverse variance weighted | 157 | 190.0306 | 156 | 0.032948146 | 0.002132602 | 0.0036 | 0.554464 | 0.033 |
| GZMB | Sepsis | MR Egger | 33 | 27. 13517 | 31 | 0.665366722 | -0.003182919 | 0.007759 | 0.684483 | 0.708 |
| GZMB | Sepsis | Inverse variance weighted | 33 | 27.30343 | 32 | 0.703335554 | -0.003182919 | 0.007759 | 0.684483 | 0.708 |
| XCL1 | Sepsis | MR Egger | 7 | 2.586326 | 5 | 0.763441835 | -0.022763701 | 0.018954 | 0.283544 | 0.641 |
| XCL1 | Sepsis | Inverse variance weighted | 7 | 4.028674 | 6 | 0.672795867 | -0.022763701 | 0.018954 | 0.283544 | 0.641 |

| IGF1R | Sepsis | MR Egger | 36 | 29.33687 | 34 | 0.695574075 | -0.000907939 | 0.005773 | 0.87597 | 0.73 |
| --- | --- | --- | --- | --- | --- | --- | --- | --- | --- | --- |
| IGF1R | Sepsis | Inverse variance weighted | 36 | 29.3616 | 35 | 0.736644103 | -0.000907939 | 0.005773 | 0.87597 | 0.73 |
| PSMA2 | Sepsis | MR Egger | 29 | 16. 17923 | 27 | 0.949444557 | -0.001588637 | 0.008672 | 0.856017 | 0.96 |
| PSMA2 | Sepsis | Inverse variance weighted | 29 | 16.21279 | 28 | 0.962562348 | -0.001588637 | 0.008672 | 0.856017 | 0.96 |
| FCRL3 | Sepsis | MR Egger | 155 | 146.8036 | 153 | 0.625846081 | -0.003440071 | 0.003631 | 0.344877 | 0.625 |
| FCRL3 | Sepsis | Inverse variance weighted | 155 | 147.7013 | 154 | 0.627705808 | -0.003440071 | 0.003631 | 0.344877 | 0.625 |
| CCL19 | Sepsis | MR Egger | 59 | 52.40165 | 57 | 0.647995431 | -0.003823898 | 0.004143 | 0.359917 | 0.66 |
| CCL19 | Sepsis | Inverse variance weighted | 59 | 53.25351 | 58 | 0.652083106 | -0.003823898 | 0.004143 | 0.359917 | 0.66 |
| ATP5B | Sepsis | MR Egger | 36 | 20.56971 | 34 | 0.966232765 | 0.005619611 | 0.008435 | 0.509749 | 0.967 |
| ATP5B | Sepsis | Inverse variance weighted | 36 | 21.01359 | 35 | 0.97024242 | 0.005619611 | 0.008435 | 0.509749 | 0.967 |
| HPGD | Sepsis | MR Egger | 11 | 10.05851 | 9 | 0.345769288 | -0.005475564 | 0.009575 | 0.5814 | 0.445 |
| HPGD | Sepsis | Inverse variance weighted | 11 | 10.42403 | 10 | 0.404111607 | -0.005475564 | 0.009575 | 0.5814 | 0.445 |
| UCHL1 | Sepsis | MR Egger | 34 | 38.76923 | 32 | 0. 190786632 | -0.003605758 | 0.004998 | 0.475886 | 0.273 |
| UCHL1 | Sepsis | Inverse variance weighted | 34 | 39.39978 | 33 | 0.20529643 | -0.003605758 | 0.004998 | 0.475886 | 0.273 |
| SPTAN1 | Sepsis | MR Egger | 6 | 0.251525 | 4 | 0.992724703 | -0.005408667 | 0.024685 | 0.837293 | 0.998 |
| SPTAN1 | Sepsis | Inverse variance weighted | 6 | 0.299532 | 5 | 0.997651874 | -0.005408667 | 0.024685 | 0.837293 | 0.998 |
| JAG1 | Sepsis | MR Egger | 14 | 11.27016 | 12 | 0.505919135 | 0.006270392 | 0.011563 | 0.597561 | 0.577 |
| JAG1 | Sepsis | Inverse variance weighted | 14 | 11.56421 | 13 | 0.563660618 | 0.006270392 | 0.011563 | 0.597561 | 0.577 |
| MICB | Sepsis | MR Egger | 345 | 382.0019 | 343 | 0.071959177 | 0.002397288 | 0.002121 | 0.259105 | 0.052 |
| MICB | Sepsis | Inverse variance weighted | 345 | 383.425 | 344 | 0.070189023 | 0.002397288 | 0.002121 | 0.259105 | 0.052 |
| TGFBR4 | Sepsis | MR Egger | 9 | 2.642629 | 7 | 0.915979626 | -0.023910364 | 0.015599 | 0. 169195 | 0.702 |
| TGFBR5 | Sepsis | Inverse variance weighted | 9 | 4.992038 | 8 | 0.758426806 | -0.023910364 | 0.015599 | 0. 169195 | 0.702 |
| UNC5C | Sepsis | MR Egger | 29 | 26. 19234 | 27 | 0.507946248 | -0.000751691 | 0.008827 | 0.932761 | 0.561 |
| UNC5C | Sepsis | Inverse variance weighted | 29 | 26. 19959 | 28 | 0.562074277 | -0.000751691 | 0.008827 | 0.932761 | 0.561 |
| GCKR | Sepsis | MR Egger | 15 | 16.24236 | 13 | 0.236290096 | -0.026136806 | 0.016515 | 0. 137531 | 0. 182 |
| GCKR | Sepsis | Inverse variance weighted | 15 | 19.37161 | 14 | 0. 151230124 | -0.026136806 | 0.016515 | 0. 137531 | 0. 182 |
| STK17B | Sepsis | MR Egger | 10 | 3.748502 | 8 | 0.879071772 | -0.022552781 | 0.017346 | 0.229756 | 0.651 |
| STK17B | Sepsis | Inverse variance weighted | 10 | 5.438879 | 9 | 0.794496041 | -0.022552781 | 0.017346 | 0.229756 | 0.651 |
| GPC6 | Sepsis | MR Egger | 19 | 15.80153 | 17 | 0.537945563 | -0.008026004 | 0.007012 | 0.26824 | 0.512 |
| GPC6 | Sepsis | Inverse variance weighted | 19 | 17. 11162 | 18 | 0.515444084 | -0.008026004 | 0.007012 | 0.26824 | 0.512 |
| IL17RC | Sepsis | MR Egger | 8 | 1.681377 | 6 | 0.94654992 | -0.003124954 | 0.027083 | 0.911904 | 0.966 |
| IL17RC | Sepsis | Inverse variance weighted | 8 | 1.694691 | 7 | 0.974795014 | -0.003124954 | 0.027083 | 0.911904 | 0.966 |
| SNRPF | Sepsis | MR Egger | 26 | 29.56624 | 24 | 0. 199546193 | -0.009323048 | 0.008581 | 0.288066 | 0. 172 |
| SNRPF | Sepsis | Inverse variance weighted | 26 | 31.02042 | 25 | 0. 188343665 | -0.009323048 | 0.008581 | 0.288066 | 0. 172 |
| ZPLD1 | Sepsis | MR Egger | 7 | 0.548109 | 5 | 0.990255663 | -9. 14E-05 | 0.030839 | 0.99775 | 0.999 |
| ZPLD1 | Sepsis | Inverse variance weighted | 7 | 0.548118 | 6 | 0.997202724 | -9. 14E-05 | 0.030839 | 0.99775 | 0.999 |
| CTRB2 | Sepsis | MR Egger | 347 | 333.9748 | 345 | 0.654990371 | -0.000949434 | 0.001865 | 0.61095 | 0.667 |
| CTRB2 | Sepsis | Inverse variance weighted | 347 | 334.234 | 346 | 0.66532107 | -0.000949434 | 0.001865 | 0.61095 | 0.667 |
| SEMA3B | Sepsis | MR Egger | 12 | 3. 139187 | 10 | 0.977956014 | -0.012968591 | 0.016912 | 0.460896 | 0.956 |
| SEMA3B | Sepsis | Inverse variance weighted | 12 | 3.727232 | 11 | 0.97722773 | -0.012968591 | 0.016912 | 0.460896 | 0.956 |
| GZMM | Sepsis | MR Egger | 7 | 5. 116932 | 5 | 0.401777105 | -0.015328227 | 0.016969 | 0.407784 | 0.477 |
| GZMM | Sepsis | Inverse variance weighted | 7 | 5.951937 | 6 | 0.4285957 | -0.015328227 | 0.016969 | 0.407784 | 0.477 |
| IFNL3 | Sepsis | MR Egger | 20 | 25.74535 | 18 | 0. 105724547 | -0.026937489 | 0.014502 | 0.079671 | 0.054 |
| IFNL3 | Sepsis | Inverse variance weighted | 20 | 30.68057 | 19 | 0.043750966 | -0.026937489 | 0.014502 | 0.079671 | 0.054 |
| IFNA6 | Sepsis | MR Egger | 10 | 4.415289 | 8 | 0.817847159 | -0.002701571 | 0.020723 | 0.899497 | 0.907 |
| IFNA6 | Sepsis | Inverse variance weighted | 10 | 4.432283 | 9 | 0.880731347 | -0.002701571 | 0.020723 | 0.899497 | 0.907 |
| CSAG1 | Sepsis | MR Egger | 39 | 36.66311 | 37 | 0.484695037 | -0.013124247 | 0.008223 | 0. 119001 | 0.475 |
| CSAG1 | Sepsis | Inverse variance weighted | 39 | 39.21025 | 38 | 0.415372908 | -0.013124247 | 0.008223 | 0. 119001 | 0.475 |
| ACP6 | Sepsis | MR Egger | 400 | 421.43 | 398 | 0.200954901 | 0.003107017 | 0.001998 | 0. 120722 | 0. 195 |
| ACP6 | Sepsis | Inverse variance weighted | 400 | 423.9907 | 399 | 0. 186647395 | 0.003107017 | 0.001998 | 0. 120722 | 0. 195 |
| LEPRE1 | Sepsis | MR Egger | 17 | 4. 110441 | 15 | 0.99735278 | -0.006589613 | 0.017508 | 0.711914 | 0.997 |
| LEPRE1 | Sepsis | Inverse variance weighted | 17 | 4.252093 | 16 | 0.998396475 | -0.006589613 | 0.017508 | 0.711914 | 0.997 |
| MANBA | Sepsis | MR Egger | 107 | 94.31739 | 105 | 0.763417752 | 0.00153821 | 0.003887 | 0.693079 | 0.767 |
| MANBA | Sepsis | Inverse variance weighted | 107 | 94.47402 | 106 | 0.781135248 | 0.00153821 | 0.003887 | 0.693079 | 0.767 |
| VWA1 | Sepsis | MR Egger | 47 | 37.58807 | 45 | 0.775619827 | 0.004066007 | 0.004685 | 0.390108 | 0.836 |
| VWA1 | Sepsis | Inverse variance weighted | 47 | 38.34115 | 46 | 0.781447685 | 0.004066007 | 0.004685 | 0.390108 | 0.836 |
| CCDC126 | Sepsis | MR Egger | 78 | 73.27324 | 76 | 0.567337943 | -0.004330312 | 0.004445 | 0.333085 | 0.572 |
| CCDC126 | Sepsis | Inverse variance weighted | 78 | 74.22216 | 77 | 0.568547445 | -0.004330312 | 0.004445 | 0.333085 | 0.572 |
| APOC3 | Sepsis | MR Egger | 69 | 73. 19026 | 67 | 0.282197995 | -0.003968543 | 0.005421 | 0.466703 | 0.271 |
| APOC3 | Sepsis | Inverse variance weighted | 69 | 73.77564 | 68 | 0.295045504 | -0.003968543 | 0.005421 | 0.466703 | 0.271 |
| PLBD2 | Sepsis | MR Egger | 16 | 5.008447 | 14 | 0.985694785 | -0.018822981 | 0.014761 | 0.223 | 0.945 |
| PLBD2 | Sepsis | Inverse variance weighted | 16 | 6.634541 | 15 | 0.967009344 | -0.018822981 | 0.014761 | 0.223 | 0.945 |
| SAYSD1 | Sepsis | MR Egger | 13 | 4.513899 | 11 | 0.952410067 | -0.017872254 | 0.015178 | 0.263827 | 0.907 |
| SAYSD1 | Sepsis | Inverse variance weighted | 13 | 5.900512 | 12 | 0.921013833 | -0.017872254 | 0.015178 | 0.263827 | 0.907 |
| NDNF | Sepsis | MR Egger | 17 | 11.88076 | 15 | 0.688031009 | -0.012616977 | 0.014753 | 0.405885 | 0.723 |
| NDNF | Sepsis | Inverse variance weighted | 17 | 12.61216 | 16 | 0.700875619 | -0.012616977 | 0.014753 | 0.405885 | 0.723 |
| LRP11 | Sepsis | MR Egger | 302 | 287. 1285 | 300 | 0.693525075 | 0.0004169 | 0.002203 | 0.850057 | 0.684 |
| LRP11 | Sepsis | Inverse variance weighted | 302 | 287. 1643 | 301 | 0.707295197 | 0.0004169 | 0.002203 | 0.850057 | 0.684 |
| CNTNAP2 | Sepsis | MR Egger | 109 | 106.4993 | 107 | 0.495479372 | -0.002450704 | 0.004317 | 0.57145 | 0.521 |
| CNTNAP2 | Sepsis | Inverse variance weighted | 109 | 106.8216 | 108 | 0.513981223 | -0.002450704 | 0.004317 | 0.57145 | 0.521 |
| MRPL52 | Sepsis | MR Egger | 9 | 3.599131 | 7 | 0.824616851 | -0.025805933 | 0.021447 | 0.267996 | 0.681 |
| MRPL52 | Sepsis | Inverse variance weighted | 9 | 5.0469 | 8 | 0.752551785 | -0.025805933 | 0.021447 | 0.267996 | 0.681 |
| S100A13 | Sepsis | MR Egger | 295 | 290.247 | 293 | 0.534472425 | 0.000134174 | 0.002332 | 0.954166 | 0.581 |
| S100A13 | Sepsis | Inverse variance weighted | 295 | 290.2503 | 294 | 0.550834511 | 0.000134174 | 0.002332 | 0.954166 | 0.581 |
| HLA | Sepsis | MR Egger | 92 | 93. 12757 | 90 | 0.389722134 | -0.007772936 | 0.004507 | 0.088049 | 0.302 |
| HLA | Sepsis | Inverse variance weighted | 92 | 96.20485 | 91 | 0.334361545 | -0.007772936 | 0.004507 | 0.088049 | 0.302 |
| IGFBPL1 | Sepsis | MR Egger | 8 | 1.248495 | 6 | 0.974421658 | -0.006797054 | 0.020994 | 0.757101 | 0.959 |
| IGFBPL1 | Sepsis | Inverse variance weighted | 8 | 1.353321 | 7 | 0.986958285 | -0.006797054 | 0.020994 | 0.757101 | 0.959 |
| C1D | Sepsis | MR Egger | 11 | 3.975041 | 9 | 0.913047554 | -0.007486565 | 0.018365 | 0.693059 | 0.934 |
| C1D | Sepsis | Inverse variance weighted | 11 | 4. 141217 | 10 | 0.940751613 | -0.007486565 | 0.018365 | 0.693059 | 0.934 |
| SMR3A | Sepsis | MR Egger | 7 | 1.645884 | 5 | 0.895645619 | -0.020517264 | 0.017675 | 0.298128 | 0.712 |
| SMR3A | Sepsis | Inverse variance weighted | 7 | 2.993336 | 6 | 0.809682754 | -0.020517264 | 0.017675 | 0.298128 | 0.712 |
| SPTLC1 | Sepsis | MR Egger | 4 | 0.689429 | 2 | 0.708422497 | 0. 117661914 | 0.076434 | 0.263587 | 0.441 |
| SPTLC1 | Sepsis | Inverse variance weighted | 4 | 3.059141 | 3 | 0.38259632 | 0. 117661914 | 0.076434 | 0.263587 | 0.441 |
| ST8SIA2 | Sepsis | MR Egger | 6 | 4.230352 | 4 | 0.375727805 | -0.03270929 | 0.06895 | 0.659958 | 0.498 |
| ST8SIA2 | Sepsis | Inverse variance weighted | 6 | 4.46836 | 5 | 0.484127933 | -0.03270929 | 0.06895 | 0.659958 | 0.498 |
| SYT8 | Sepsis | MR Egger | 9 | 2.372376 | 7 | 0.936396868 | -0.012888905 | 0.024546 | 0.615738 | 0.952 |
| SYT8 | Sepsis | Inverse variance weighted | 9 | 2.648092 | 8 | 0.954467243 | -0.012888905 | 0.024546 | 0.615738 | 0.952 |
| HRK | Sepsis | MR Egger | 15 | 6.750552 | 13 | 0.914544794 | -0.008853227 | 0.015687 | 0.582121 | 0.913 |
| HRK | Sepsis | Inverse variance weighted | 15 | 7.069046 | 14 | 0.932017394 | -0.008853227 | 0.015687 | 0.582121 | 0.913 |
| FTMT | Sepsis | MR Egger | 290 | 327.3216 | 288 | 0.055161657 | 0.002028828 | 0.00247 | 0.412077 | 0.046 |
| FTMT | Sepsis | Inverse variance weighted | 290 | 328.0885 | 289 | 0.05645031 | 0.002028828 | 0.00247 | 0.412077 | 0.046 |
| CD3E | Sepsis | MR Egger | 81 | 92.77485 | 79 | 0. 137790938 | 0.004964151 | 0.004921 | 0.316129 | 0. 14 |
| CD3E | Sepsis | Inverse variance weighted | 81 | 93.97008 | 80 | 0. 136102195 | 0.004964151 | 0.004921 | 0.316129 | 0. 14 |
| ALK | Sepsis | MR Egger | 7 | 1.943589 | 5 | 0.856894173 | -0.002771075 | 0.028533 | 0.926405 | 0.919 |
| ALK | Sepsis | Inverse variance weighted | 7 | 1.953021 | 6 | 0.923968072 | -0.002771075 | 0.028533 | 0.926405 | 0.919 |
| POMGNT1 | Sepsis | MR Egger | 7 | 4.507889 | 5 | 0.478828678 | -0.032329183 | 0.057224 | 0.596507 | 0.612 |
| POMGNT1 | Sepsis | Inverse variance weighted | 7 | 4.827068 | 6 | 0.566176759 | -0.032329183 | 0.057224 | 0.596507 | 0.612 |
| SULF2 | Sepsis | MR Egger | 17 | 16.73166 | 15 | 0.335157445 | 0.003800577 | 0.015461 | 0.809152 | 0.436 |
| SULF2 | Sepsis | Inverse variance weighted | 17 | 16.79906 | 16 | 0.398713576 | 0.003800577 | 0.015461 | 0.809152 | 0.436 |
| QSOX2 | Sepsis | MR Egger | 266 | 265. 1843 | 264 | 0.467931003 | 0.002812242 | 0.002052 | 0. 171782 | 0.429 |
| QSOX2 | Sepsis | Inverse variance weighted | 266 | 267.0703 | 265 | 0.452781205 | 0.002812242 | 0.002052 | 0. 171782 | 0.429 |
| PLVAP | Sepsis | MR Egger | 15 | 12.5665 | 13 | 0.48182566 | -0.017575571 | 0.015233 | 0.269372 | 0.501 |
| PLVAP | Sepsis | Inverse variance weighted | 15 | 13.89765 | 14 | 0.457364076 | -0.017575571 | 0.015233 | 0.269372 | 0.501 |
| TRAPPC5 | Sepsis | MR Egger | 13 | 6. 118034 | 11 | 0.865373668 | -0.024822765 | 0.017984 | 0. 194905 | 0.709 |
| TRAPPC5 | Sepsis | Inverse variance weighted | 13 | 8.023208 | 12 | 0.783314139 | -0.024822765 | 0.017984 | 0. 194905 | 0.709 |
| GPC1 | Sepsis | MR Egger | 83 | 105.9513 | 81 | 0.032874761 | 0.000561508 | 0.004683 | 0.904849 | 0.038 |
| GPC1 | Sepsis | Inverse variance weighted | 83 | 105.9701 | 82 | 0.038680368 | 0.000561508 | 0.004683 | 0.904849 | 0.038 |
| CRIM1 | Sepsis | MR Egger | 5 | 0. 129426 | 3 | 0.988086226 | -0.0085818 | 0.02423 | 0.746634 | 0.991 |
| CRIM1 | Sepsis | Inverse variance weighted | 5 | 0.254871 | 4 | 0.992538082 | -0.0085818 | 0.02423 | 0.746634 | 0.991 |
| DPEP1 | Sepsis | MR Egger | 122 | 97.38882 | 120 | 0.935627461 | -0.003867317 | 0.00377 | 0.307099 | 0.937 |

| DPEP1 | Sepsis | Inverse variance weighted | 122 | 98.44087 | 121 | 0.934220576 | -0.003867317 | 0.00377 | 0.307099 | 0.937 |
| --- | --- | --- | --- | --- | --- | --- | --- | --- | --- | --- |
| PLA2G2C | Sepsis | MR Egger | 7 | 0.316431 | 5 | 0.997322587 | -0.00507771 | 0.025248 | 0.848537 | 0.998 |
| PLA2G2C | Sepsis | Inverse variance weighted | 7 | 0.356877 | 6 | 0.999171192 | -0.00507771 | 0.025248 | 0.848537 | 0.998 |
| BATF3 | Sepsis | MR Egger | 17 | 12.26879 | 15 | 0.658579965 | -0.000171895 | 0.014873 | 0.990931 | 0.769 |
| BATF3 | Sepsis | Inverse variance weighted | 17 | 12.26893 | 16 | 0.725269063 | -0.000171895 | 0.014873 | 0.990931 | 0.769 |
| GLT8D1 | Sepsis | MR Egger | 90 | 77. 15994 | 88 | 0.788860991 | -0.002048895 | 0.004076 | 0.616407 | 0.81 |
| GLT8D1 | Sepsis | Inverse variance weighted | 90 | 77.41268 | 89 | 0.80477144 | -0.002048895 | 0.004076 | 0.616407 | 0.81 |
| LCT | Sepsis | MR Egger | 292 | 325. 1704 | 290 | 0.075985217 | -0.000475515 | 0.002224 | 0.830814 | 0.077 |
| LCT | Sepsis | Inverse variance weighted | 292 | 325.2217 | 291 | 0.081683897 | -0.000475515 | 0.002224 | 0.830814 | 0.077 |
| HAVCR1 | Sepsis | MR Egger | 77 | 72.57646 | 75 | 0.557817582 | -0.003534143 | 0.004866 | 0.469887 | 0.61 |
| HAVCR1 | Sepsis | Inverse variance weighted | 77 | 73. 10404 | 76 | 0.572861478 | -0.003534143 | 0.004866 | 0.469887 | 0.61 |
| CNTNAP5 | Sepsis | MR Egger | 21 | 13.56025 | 19 | 0.808696931 | 3.26E-06 | 0.010691 | 0.99976 | 0.845 |
| CNTNAP5 | Sepsis | Inverse variance weighted | 21 | 13.56025 | 20 | 0.852074579 | 3.26E-06 | 0.010691 | 0.99976 | 0.845 |
| UMODL1 | Sepsis | MR Egger | 12 | 5.606607 | 10 | 0.847161176 | -0.001071486 | 0.015802 | 0.947276 | 0.905 |
| UMODL1 | Sepsis | Inverse variance weighted | 12 | 5.611205 | 11 | 0.89800665 | -0.001071486 | 0.015802 | 0.947276 | 0.905 |
| MASP1 | Sepsis | MR Egger | 7 | 1.276521 | 5 | 0.937328976 | -0.023886004 | 0.023537 | 0.356744 | 0.804 |
| MASP1 | Sepsis | Inverse variance weighted | 7 | 2.306427 | 6 | 0.889471489 | -0.023886004 | 0.023537 | 0.356744 | 0.804 |
| CCL26 | Sepsis | MR Egger | 14 | 5.887668 | 12 | 0.921638299 | -0.009464441 | 0.014309 | 0.520839 | 0.878 |
| CCL26 | Sepsis | Inverse variance weighted | 14 | 6.325149 | 13 | 0.933514585 | -0.009464441 | 0.014309 | 0.520839 | 0.878 |
| IFNAR1 | Sepsis | MR Egger | 186 | 189.9235 | 184 | 0.366852654 | 0.000922297 | 0.002508 | 0.713507 | 0.374 |
| IFNAR1 | Sepsis | Inverse variance weighted | 186 | 190.0631 | 185 | 0.38382801 | 0.000922297 | 0.002508 | 0.713507 | 0.374 |
| UBE2G2 | Sepsis | MR Egger | 53 | 39.62574 | 51 | 0.876054846 | -0.012214705 | 0.007728 | 0. 12017 | 0.826 |
| UBE2G2 | Sepsis | Inverse variance weighted | 53 | 42. 12379 | 52 | 0.834242843 | -0.012214705 | 0.007728 | 0. 12017 | 0.826 |
| PLXDC1 | Sepsis | MR Egger | 76 | 65.83288 | 74 | 0.739692697 | 0.001115484 | 0.005035 | 0.825269 | 0.79 |
| PLXDC1 | Sepsis | Inverse variance weighted | 76 | 65.88197 | 75 | 0.764838471 | 0.001115484 | 0.005035 | 0.825269 | 0.79 |
| ERP27 | Sepsis | MR Egger | 4 | 0.638044 | 2 | 0.726859388 | -0.049505948 | 0.057421 | 0.479466 | 0.772 |
| ERP27 | Sepsis | Inverse variance weighted | 4 | 1.381361 | 3 | 0.709909625 | -0.049505948 | 0.057421 | 0.479466 | 0.772 |
| TTC9B | Sepsis | MR Egger | 22 | 18.37095 | 20 | 0.56298614 | -0.004063215 | 0.010349 | 0.698752 | 0.545 |
| TTC9B | Sepsis | Inverse variance weighted | 22 | 18.5251 | 21 | 0.615575149 | -0.004063215 | 0.010349 | 0.698752 | 0.545 |
| ACVR2B | Sepsis | MR Egger | 7 | 2.295195 | 5 | 0.806972354 | -0.01650461 | 0.01764 | 0.392412 | 0.682 |
| ACVR2B | Sepsis | Inverse variance weighted | 7 | 3. 170613 | 6 | 0.787148613 | -0.01650461 | 0.01764 | 0.392412 | 0.682 |
| LMAN2 | Sepsis | MR Egger | 14 | 7.989942 | 12 | 0.785915924 | -0.015998095 | 0.012935 | 0.23982 | 0.69 |
| LMAN2 | Sepsis | Inverse variance weighted | 14 | 9.51962 | 13 | 0.732665325 | -0.015998095 | 0.012935 | 0.23982 | 0.69 |
| MNX1 | Sepsis | MR Egger | 10 | 1.504278 | 8 | 0.992636555 | -0.01283901 | 0.018219 | 0.500994 | 0.983 |
| MNX1 | Sepsis | Inverse variance weighted | 10 | 2.00088 | 9 | 0.991453686 | -0.01283901 | 0.018219 | 0.500994 | 0.983 |
| SYT2 | Sepsis | MR Egger | 9 | 3.859625 | 7 | 0.795796543 | -0.029243718 | 0.022031 | 0.226042 | 0.601 |
| SYT2 | Sepsis | Inverse variance weighted | 9 | 5.621516 | 8 | 0.689543089 | -0.029243718 | 0.022031 | 0.226042 | 0.601 |
| ESRRA | Sepsis | MR Egger | 8 | 0. 181959 | 6 | 0.99988275 | -0.009010018 | 0.02273 | 0.705528 | 0.999 |
| ESRRA | Sepsis | Inverse variance weighted | 8 | 0.339087 | 7 | 0.999848725 | -0.009010018 | 0.02273 | 0.705528 | 0.999 |
| ADAM15 | Sepsis | MR Egger | 11 | 3.978923 | 9 | 0.912794291 | -0.011401739 | 0.019431 | 0.571768 | 0.94 |
| ADAM15 | Sepsis | Inverse variance weighted | 11 | 4.323244 | 10 | 0.931588983 | -0.011401739 | 0.019431 | 0.571768 | 0.94 |
| HOGA1 | Sepsis | MR Egger | 13 | 11.52274 | 11 | 0.400563698 | -0.021659113 | 0.015085 | 0. 178876 | 0.385 |
| HOGA1 | Sepsis | Inverse variance weighted | 13 | 13.68227 | 12 | 0.321456076 | -0.021659113 | 0.015085 | 0. 178876 | 0.385 |
| NCF2 | Sepsis | MR Egger | 69 | 62. 11973 | 67 | 0.645908455 | -0.002432918 | 0.003616 | 0.503432 | 0.669 |
| NCF2 | Sepsis | Inverse variance weighted | 69 | 62.57229 | 68 | 0.663057127 | -0.002432918 | 0.003616 | 0.503432 | 0.669 |
| AGA | Sepsis | MR Egger | 15 | 14.06334 | 13 | 0.36939877 | -0.02029779 | 0.015647 | 0.217112 | 0.309 |
| AGA | Sepsis | Inverse variance weighted | 15 | 15.8837 | 14 | 0.320528033 | -0.02029779 | 0.015647 | 0.217112 | 0.309 |
| TMEM190 | Sepsis | MR Egger | 247 | 232.8802 | 245 | 0.70075184 | -0.000687341 | 0.002516 | 0.7849 | 0.758 |
| TMEM190 | Sepsis | Inverse variance weighted | 247 | 232.9549 | 246 | 0.715203736 | -0.000687341 | 0.002516 | 0.7849 | 0.758 |
| PSMB6 | Sepsis | MR Egger | 8 | 1.674995 | 6 | 0.947035293 | -0.002692555 | 0.019285 | 0.893531 | 0.981 |
| PSMB6 | Sepsis | Inverse variance weighted | 8 | 1.694488 | 7 | 0.974803638 | -0.002692555 | 0.019285 | 0.893531 | 0.981 |
| LYSMD3 | Sepsis | MR Egger | 5 | 1.554834 | 3 | 0.669673647 | -0.004088048 | 0.025159 | 0.881248 | 0.873 |
| LYSMD3 | Sepsis | Inverse variance weighted | 5 | 1.581237 | 4 | 0.812160364 | -0.004088048 | 0.025159 | 0.881248 | 0.873 |
| SUDS3 | Sepsis | MR Egger | 17 | 9.780301 | 15 | 0.833327232 | -0.025378788 | 0.01304 | 0.070615 | 0.649 |
| SUDS3 | Sepsis | Inverse variance weighted | 17 | 13.5679 | 16 | 0.630869557 | -0.025378788 | 0.01304 | 0.070615 | 0.649 |
| IL20RB | Sepsis | MR Egger | 37 | 42.661 | 35 | 0. 174970122 | -0.002158841 | 0.013498 | 0.873854 | 0.211 |
| IL20RB | Sepsis | Inverse variance weighted | 37 | 42.69218 | 36 | 0.205528984 | -0.002158841 | 0.013498 | 0.873854 | 0.211 |
| CHRD | Sepsis | MR Egger | 28 | 25.74192 | 26 | 0.47735904 | -0.018139438 | 0.012438 | 0. 156695 | 0.403 |
| CHRD | Sepsis | Inverse variance weighted | 28 | 27.86896 | 27 | 0.417753187 | -0.018139438 | 0.012438 | 0. 156695 | 0.403 |
| REPIN1 | Sepsis | MR Egger | 14 | 3.80855 | 12 | 0.986648425 | -0.01829111 | 0.013039 | 0. 186026 | 0.949 |
| REPIN1 | Sepsis | Inverse variance weighted | 14 | 5.776305 | 13 | 0.953916448 | -0.01829111 | 0.013039 | 0. 186026 | 0.949 |
| ANXA10 | Sepsis | MR Egger | 18 | 6. 126667 | 16 | 0.986668552 | -0.018748421 | 0.012601 | 0. 156224 | 0.949 |
| ANXA10 | Sepsis | Inverse variance weighted | 18 | 8.340465 | 17 | 0.958714741 | -0.018748421 | 0.012601 | 0. 156224 | 0.949 |
| AK5 | Sepsis | MR Egger | 21 | 11.80622 | 19 | 0.893740496 | -0.00513219 | 0.011363 | 0.656641 | 0.92 |
| AK5 | Sepsis | Inverse variance weighted | 21 | 12.01019 | 20 | 0.915724633 | -0.00513219 | 0.011363 | 0.656641 | 0.92 |
| NAB1 | Sepsis | MR Egger | 4 | 0.001541 | 2 | 0.999229677 | 0.03382669 | 0.025206 | 0.311647 | 0.667 |
| NAB1 | Sepsis | Inverse variance weighted | 4 | 1.802595 | 3 | 0.614370299 | 0.03382669 | 0.025206 | 0.311647 | 0.667 |
| GABBR2 | Sepsis | MR Egger | 17 | 6. 174578 | 15 | 0.976663643 | 0.000548786 | 0.01215 | 0.964571 | 0.992 |
| GABBR2 | Sepsis | Inverse variance weighted | 17 | 6. 176617 | 16 | 0.986072886 | 0.000548786 | 0.01215 | 0.964571 | 0.992 |
| CGA | Sepsis | MR Egger | 17 | 10.88355 | 15 | 0.760804703 | -0.025329301 | 0.019155 | 0.205866 | 0.729 |
| CGA | Sepsis | Inverse variance weighted | 17 | 12.63212 | 16 | 0.699441251 | -0.025329301 | 0.019155 | 0.205866 | 0.729 |
| NCF4 | Sepsis | MR Egger | 25 | 16. 18478 | 23 | 0.847245158 | -0.008440364 | 0.010336 | 0.422556 | 0.827 |
| NCF4 | Sepsis | Inverse variance weighted | 25 | 16.85155 | 24 | 0.854923823 | -0.008440364 | 0.010336 | 0.422556 | 0.827 |
| TRAPPC3 | Sepsis | MR Egger | 62 | 52.99162 | 60 | 0.727415151 | -0.009958838 | 0.007214 | 0. 172569 | 0.692 |
| TRAPPC3 | Sepsis | Inverse variance weighted | 62 | 54.89727 | 61 | 0.695385767 | -0.009958838 | 0.007214 | 0. 172569 | 0.692 |
| AKT2 | Sepsis | MR Egger | 48 | 62.2756 | 46 | 0.055051601 | -0.000681521 | 0.005012 | 0.892435 | 0.085 |
| AKT2 | Sepsis | Inverse variance weighted | 48 | 62.30064 | 47 | 0.066725425 | -0.000681521 | 0.005012 | 0.892435 | 0.085 |
| MAD2L1 | Sepsis | MR Egger | 19 | 10.47646 | 17 | 0.882451712 | -0.020814895 | 0.012967 | 0. 12686 | 0.79 |
| MAD2L1 | Sepsis | Inverse variance weighted | 19 | 13.05319 | 18 | 0.78840351 | -0.020814895 | 0.012967 | 0. 12686 | 0.79 |
| IFNA4 | Sepsis | MR Egger | 8 | 2.440813 | 6 | 0.875031933 | 0.000705968 | 0.025646 | 0.978932 | 0.908 |
| IFNA4 | Sepsis | Inverse variance weighted | 8 | 2.441571 | 7 | 0.931432206 | 0.000705968 | 0.025646 | 0.978932 | 0.908 |
| GLIPR2 | Sepsis | MR Egger | 43 | 35.41557 | 41 | 0.716536308 | 0.007970314 | 0.006086 | 0. 197607 | 0.67 |
| GLIPR2 | Sepsis | Inverse variance weighted | 43 | 37. 13074 | 42 | 0.684306817 | 0.007970314 | 0.006086 | 0. 197607 | 0.67 |
| EPHB4 | Sepsis | MR Egger | 43 | 38.3155 | 41 | 0.59059268 | 0.003178905 | 0.005093 | 0.535963 | 0.631 |
| EPHB4 | Sepsis | Inverse variance weighted | 43 | 38.7051 | 42 | 0.616405268 | 0.003178905 | 0.005093 | 0.535963 | 0.631 |
| FLT4 | Sepsis | MR Egger | 189 | 203.6095 | 187 | 0. 192449456 | 0.00222937 | 0.003018 | 0.461026 | 0.223 |
| FLT4 | Sepsis | Inverse variance weighted | 189 | 204.2037 | 188 | 0. 198519734 | 0.00222937 | 0.003018 | 0.461026 | 0.223 |
| LGR5 | Sepsis | MR Egger | 13 | 4.045417 | 11 | 0.968569577 | -0.010536212 | 0.015481 | 0.51021 | 0.97 |
| LGR5 | Sepsis | Inverse variance weighted | 13 | 4.508603 | 12 | 0.972416195 | -0.010536212 | 0.015481 | 0.51021 | 0.97 |
| BTLA | Sepsis | MR Egger | 12 | 4.77861 | 10 | 0.90546785 | -0.019475855 | 0.01718 | 0.283387 | 0.799 |
| BTLA | Sepsis | Inverse variance weighted | 12 | 6.063774 | 11 | 0.869075349 | -0.019475855 | 0.01718 | 0.283387 | 0.799 |
| TLR1 | Sepsis | MR Egger | 38 | 32.0048 | 36 | 0.659119714 | 0.005636677 | 0.007528 | 0.458847 | 0.665 |
| TLR1 | Sepsis | Inverse variance weighted | 38 | 32.56549 | 37 | 0.676980664 | 0.005636677 | 0.007528 | 0.458847 | 0.665 |
| RNASET2 | Sepsis | MR Egger | 78 | 68.22554 | 76 | 0.725378078 | 0.006755435 | 0.003965 | 0.092482 | 0.685 |
| RNASET2 | Sepsis | Inverse variance weighted | 78 | 71. 12888 | 77 | 0.666981807 | 0.006755435 | 0.003965 | 0.092482 | 0.685 |
| SULT1E1 | Sepsis | MR Egger | 6 | 0. 178094 | 4 | 0.996263019 | -0.001808824 | 0.022262 | 0.939146 | 0.999 |
| SULT1E1 | Sepsis | Inverse variance weighted | 6 | 0. 184695 | 5 | 0.999269829 | -0.001808824 | 0.022262 | 0.939146 | 0.999 |
| ZADH2 | Sepsis | MR Egger | 4 | 0.639958 | 2 | 0.726164231 | 0.000884059 | 0.027753 | 0.977481 | 0.837 |
| ZADH2 | Sepsis | Inverse variance weighted | 4 | 0.640973 | 3 | 0.88699179 | 0.000884059 | 0.027753 | 0.977481 | 0.837 |
| SYNJ2BP | Sepsis | MR Egger | 7 | 0. 160749 | 5 | 0.999479586 | -0.009159142 | 0.020358 | 0.671608 | 0.998 |
| SYNJ2BP | Sepsis | Inverse variance weighted | 7 | 0.36317 | 6 | 0.999128604 | -0.009159142 | 0.020358 | 0.671608 | 0.998 |
| DCUN1D1 | Sepsis | MR Egger | 46 | 47.47507 | 44 | 0.33294115 | 0.00868353 | 0.006878 | 0.213387 | 0.315 |
| DCUN1D1 | Sepsis | Inverse variance weighted | 46 | 49. 19511 | 45 | 0.308895839 | 0.00868353 | 0.006878 | 0.213387 | 0.315 |
| CD46 | Sepsis | MR Egger | 29 | 22.7193 | 27 | 0.6999965 | -0.002099743 | 0.008244 | 0.800887 | 0.749 |
| CD46 | Sepsis | Inverse variance weighted | 29 | 22.78417 | 28 | 0.74376408 | -0.002099743 | 0.008244 | 0.800887 | 0.749 |
| TPP1 | Sepsis | MR Egger | 34 | 34.38823 | 32 | 0.35406758 | 0.004300262 | 0.006721 | 0.526852 | 0.391 |
| TPP1 | Sepsis | Inverse variance weighted | 34 | 34.82814 | 33 | 0.381017512 | 0.004300262 | 0.006721 | 0.526852 | 0.391 |
| BTN3A3 | Sepsis | MR Egger | 374 | 444.8499 | 372 | 0.005573044 | -0.002038588 | 0.002139 | 0.341239 | 0.004 |
| BTN3A3 | Sepsis | Inverse variance weighted | 374 | 445.9359 | 373 | 0.005576706 | -0.002038588 | 0.002139 | 0.341239 | 0.004 |
| GMNN | Sepsis | MR Egger | 13 | 5. 153852 | 11 | 0.923487092 | -0.001812621 | 0.017578 | 0.919726 | 0.929 |
| GMNN | Sepsis | Inverse variance weighted | 13 | 5. 164485 | 12 | 0.952258024 | -0.001812621 | 0.017578 | 0.919726 | 0.929 |

| APTX | Sepsis | MR Egger | 12 | 4. 216133 | 10 | 0.937070482 | -0.027026850 | 0.016021 | 0.122502 | 0.746 |
| --- | --- | --- | --- | --- | --- | --- | --- | --- | --- | --- |
| APTX | Sepsis | Inverse variance weighted | 12 | 7. 062027 | 11 | 0.794038338 | -0.027026850 | 0.016021 | 0.122502 | 0.746 |
| TP53I3 | Sepsis | MR Egger | 88 | 79. 77774 | 86 | 0.668298484 | -0.001784313 | 0.003683 | 0.629313 | 0.696 |
| TP53I3 | Sepsis | Inverse variance weighted | 88 | 80. 01241 | 87 | 0.689240860 | -0.001784313 | 0.003683 | 0.629313 | 0.696 |
| SERF2 | Sepsis | MR Egger | 13 | 4. 320576 | 11 | 0.95958431 | -0.01226537 | 0.015094 | 0.433672 | 0.928 |
| SERF2 | Sepsis | Inverse variance weighted | 13 | 4. 980924 | 12 | 0.958613087 | -0.01226537 | 0.015094 | 0.433672 | 0.928 |
| STXBP6 | Sepsis | MR Egger | 38 | 24. 12261 | 36 | 0.934654119 | -0.007917523 | 0.00696 | 0.262822 | 0.921 |
| STXBP6 | Sepsis | Inverse variance weighted | 38 | 25. 41663 | 37 | 0.925101898 | -0.007917523 | 0.00696 | 0.262822 | 0.921 |
| COMT | Sepsis | MR Egger | 28 | 27. 80104 | 26 | 0.36831806 | -0.002567506 | 0.008024 | 0.751554 | 0.446 |
| COMT | Sepsis | Inverse variance weighted | 28 | 27. 91051 | 27 | 0.415598805 | -0.002567506 | 0.008024 | 0.751554 | 0.446 |
| AES | Sepsis | MR Egger | 18 | 17. 66395 | 16 | 0.343938834 | -0.004268693 | 0.014222 | 0.767928 | 0.416 |
| AES | Sepsis | Inverse variance weighted | 18 | 17. 76341 | 17 | 0.403911448 | -0.004268693 | 0.014222 | 0.767928 | 0.416 |
| TBPL1 | Sepsis | MR Egger | 26 | 31. 74503 | 24 | 0.133442439 | 0.010607374 | 0.009425 | 0.271531 | 0.139 |
| TBPL1 | Sepsis | Inverse variance weighted | 26 | 33.4204 | 25 | 0.120886616 | 0.010607374 | 0.009425 | 0.271531 | 0.139 |

MR, Mendelian Randomization; MR-PRESSO, MR-Pleiotropy Residual Sum and Outlier method.

**Supplementary** **Table** **S5:** The results of GO and KEGG functional enrichment analysis of 141 pQTL genes

| Category | Term | PValue |
| --- | --- | --- |
| BP | multicellular organism development | 2. 12E-04 |
| BP | neutrophil chemotaxis | 2.37E-04 |
| BP | positive regulation of kinase activity | 5.01E-04 |
| BP | positive regulation of cell migration | 7.05E-04 |
| BP | response to virus | 8.66E-04 |
| BP | positive regulation of ERK and ERK cascade | 8.71E-04 |
| BP | phosphorylation | 0.00112424 |
| BP | chemokine-mediated signaling pathway | 0.00124652 |
| BP | positive regulation of endothelial cell proliferation | 0.00138434 |
| BP | lymphocyte chemotaxis | 0.00150423 |
| BP | angiogenesis | 0.00173516 |
| BP | positive regulation of CD4-positive, alpha-beta T cell proliferation | 0.00192923 |
| BP | cellular response to interleukin-1 | 0.00204252 |
| BP | Inflammatory response | 0.00215482 |
| BP | positive regulation of interleukin-10 production | 0.00277562 |
| BP | protein autophosphorylation | 0.00329329 |
| BP | cellular response to virus | 0.00366569 |
| BP | monocyte chemotaxis | 0.00382641 |
| BP | antimicrobial humoral immune response mediated by antimicrobial peptide | 0.00619416 |
| BP | Immune response | 0.0069343 |
| BP | T cell mediated immunity | 0.00704805 |
| BP | negative regulation of fibroblast growth factor receptor signaling pathway | 0.0093973 |
| BP | proteolysis | 0.01224122 |
| BP | eosinophil chemotaxis | 0.01299311 |
| BP | cellular response to tumor necrosis factor | 0.01321944 |
| BP | immune response-inhibiting signal transduction | 0.01333352 |
| BP | positive regulation of neutrophil chemotaxis | 0.0139717 |
| BP | apoptotic process | 0.01828044 |
| BP | chemorepulsion of axon | 0.01993397 |
| BP | regulation of reproductive process | 0.01993397 |
| BP | cell-cell signaling | 0.02064199 |
| BP | positive regulation of angiogenesis | 0.02399894 |
| BP | negative regulation of endothelial cell apoptotic process | 0.02668079 |
| BP | positive regulation of T cell mediated cytotoxicity | 0.03072087 |
| BP | cellular response to type II interferon | 0.03188136 |
| BP | regulation of signal transduction | 0.03498616 |
| BP | negative regulation of cell migration | 0.03702633 |
| BP | positive regulation of MAPK cascade | 0.03764219 |
| BP | cell surface receptor protein tyrosine kinase signaling pathway | 0.03849383 |
| BP | type I interferon-mediated signaling pathway | 0.04100555 |
| BP | substantia nigra development | 0.04100555 |
| BP | release of sequestered calcium ion into cytosol | 0.04575629 |
| BP | negative regulation of receptor binding | 0.0459004 |
| BP | Schwann cell differentiation | 0.0459004 |
| BP | chemotaxis | 0.04766124 |
| BP | positive regulation of smooth muscle cell proliferation | 0.05069869 |
| BP | positive regulation of transforming growth factor beta production | 0.0522846 |
| BP | positive regulation of GTPase activity | 0.05362892 |
| BP | negative regulation of apoptotic process | 0.05420949 |
| BP | response to molecule of bacterial origin | 0.05862641 |
| BP | killing of cells of another organism | 0.06112113 |
| BP | positive regulation of T cell proliferation | 0.06292401 |
| BP | innate immune response | 0.06868566 |
| BP | positive regulation of T cell cytokine production | 0.07118394 |
| BP | regulation of multicellular organismal process | 0.07118394 |

| BP | artery development | 0.07118394 |
| --- | --- | --- |
| BP | vesicle coating | 0.07118394 |
| BP | gamma-delta T cell activation | 0.07118394 |
| BP | response to wounding | 0.07220114 |
| BP | positive regulation of endothelial cell migration | 0.07220114 |
| BP | regulation of cell population proliferation | 0.07594186 |
| BP | insulin receptor signaling pathway | 0.08188812 |
| BP | regulation of vascular permeability | 0.08357521 |
| BP | mammary gland epithelial cell differentiation | 0.08357521 |
| BP | lymphangiogenesis | 0.08357521 |
| BP | inner ear auditory receptor cell differentiation | 0.08970918 |
| BP | peptidyl-tyrosine autophosphorylation | 0.08970918 |
| BP | single fertilization | 0.08990807 |
| BP | cellular response to mechanical stimulus | 0.09400197 |
| BP | T cell mediated cytotoxicity | 0.09580241 |
| BP | positive regulation of osteoblast differentiation | 0.09814892 |
| CC | extracellular region | 4.83E- 11 |
| CC | extracellular space | 7.06E- 11 |
| CC | cell surface | 5.49E-06 |
| CC | plasma membrane | 7. 10E-05 |
| CC | receptor complex | 1. 10E-04 |
| CC | lysosomal lumen | 4.39E-04 |
| CC | external side of plasma membrane | 0.00191863 |
| CC | extracellular exosome | 0.00982743 |
| CC | Golgi apparatus | 0.01181677 |
| CC | phagolysosome | 0.03190471 |
| CC | inner acrosomal membrane | 0.03190471 |
| CC | endoplasmic reticulum | 0.04322207 |
| CC | membrane raft | 0.04825439 |
| CC | collagen-containing extracellular matrix | 0.04946288 |
| CC | specific granule lumen | 0.06272187 |
| CC | dense core granule | 0.06885917 |
| CC | TRAPPII protein complex | 0.07488063 |
| CC | TRAPPIII protein complex | 0.07488063 |
| CC | caveola | 0.08483347 |
| CC | TRAPP complex | 0.09271408 |
| CC | endoplasmic reticulum-Golgi intermediate compartment | 0.09664876 |
| MF | transmembrane receptor protein tyrosine kinase activity | 1.35E-04 |
| MF | chemokine activity | 3.84E-04 |
| MF | CCR chemokine receptor binding | 9.59E-04 |
| MF | insulin-like growth factor binding | 0.00195482 |
| MF | serine-type endopeptidase activity | 0.00224762 |
| MF | sialic acid binding | 0.01037965 |
| MF | cytokine receptor binding | 0.01220052 |
| MF | phosphatidylserine binding | 0.0122261 |
| MF | carbohydrate binding | 0.01240139 |
| MF | glycosaminoglycan binding | 0.0131595 |
| MF | D-mannose binding | 0.0131595 |
| MF | signaling receptor activity | 0.01820813 |
| MF | insulin-like growth factor receptor activity | 0.02006835 |
| MF | activin receptor activity | 0.02666858 |
| MF | growth factor binding | 0.02835004 |
| MF | protein homodimerization activity | 0.0303208 |
| MF | CCR3 chemokine receptor binding | 0.0332247 |
| MF | transmembrane signaling receptor activity | 0.03474541 |
| MF | cytokine activity | 0.04297966 |
| MF | chemokine receptor binding | 0.05263128 |
| MF | calcium-dependent phospholipid binding | 0.05301517 |

| MF | syntaxin binding | 0.05474249 |
| --- | --- | --- |
| MF | coreceptor activity | 0.06004133 |
| MF | serine-type peptidase activity | 0.06366796 |
| MF | calcium ion binding | 0.06513102 |
| MF | superoxide-generating NADPH oxidase activator activity | 0.06535373 |
| MF | activin binding | 0.07165124 |
| MF | kinase activator activity | 0.07165124 |
| MF | receptor ligand activity | 0.08283387 |
| MF | endopeptidas activity | 0.09093669 |
| KEGG | Cytokine-cytokine receptor interaction | 3.67E-07 |
| KEGG | Viral protein interaction with cytokine and cytokine receptor | 2.76E-04 |
| KEGG | JAK-STAT signaling pathway | 7.83E-04 |
| KEGG | Measles | 0.00157035 |
| KEGG | Toll-like receptor signaling pathway | 0.00300076 |
| KEGG | pathways in cancer | 0.0081911 |
| KEGG | Kaposi sarcoma-associated herpesvirus infection | 0.00849516 |
| KEGG | Autoimmune thyroid disease | 0.01208352 |
| KEGG | Lipid and atherosclerosis | 0.01330201 |
| KEGG | Hepatitis B | 0.015884 |
| KEGG | Progesterone-mediated oocyte maturation | 0.017945 |
| KEGG | Natural killer cell mediated cytotoxicity | 0.02995441 |
| KEGG | Chemokine signaling pathway | 0.03032504 |
| KEGG | Epstein-Barr virus infection | 0.036531 |
| KEGG | Osteoclast differentiation | 0.03950793 |
| KEGG | Alcoholic liver disease | 0.04125136 |
| KEGG | Breast cancer | 0.04486821 |
| KEGG | PIK-Akt signaling pathway | 0.04494641 |
| KEGG | Complement and coagulation cascades | 0.04525897 |
| KEGG | PD-L1expression and PD-1 checkpoint pathway in cancer | 0.04784229 |
| KEGG | Human T-cell leukemia virus 1 infection | 0.05115812 |
| KEGG | MAPK signaling pathway | 0.05390245 |
| KEGG | IL-17 signaling pathway | 0.0546114 |
| KEGG | Ras signaling pathway | 0.06410325 |
| KEGG | Coronavirus disease-COVID-19 | 0.06410325 |
| KEGG | Chagas disease | 0.06633982 |
| KEGG | Influenza A | 0.07018207 |
| KEGG | Transcriptional misregulation in cancer | 0.09723397 |

**Supplementary** **Table** **S6:** The results of GO and KEGG functional enrichment analysis of 65 DEGs

| Category | Term | PValue |
| --- | --- | --- |
| BP | inflammatory response | 2.05E-04 |
| BP | response to lipopolysaccharide | 6.97E-04 |
| BP | neutrophil activation | 0.001217 |
| BP | apoptotic process | 0.001535 |
| BP | cellular response to lipopolysaccharide | 0.002251 |
| BP | positive regulation of receptor signaling pathway via JAK-STAT | 0.00686 |
| BP | positive regulation of cellular biosynthetic process | 0.008641 |
| BP | positive regulation of T cell proliferation | 0.01345 |
| BP | immune response | 0.01512 |
| BP | heterophilic cell-cell adhesion via plasma membrane cell adhesion molecule | s 0.01841 |
| BP | neutrophil chemotaxis | 0.024022 |
| BP | response to stimulus | 0.028487 |
| BP | negative regulation of T cell apoptotic process | 0.028518 |
| BP | antimicrobial humoral immune response mediated by antimicrobial peptide | 0.039624 |
| BP | adaptive immune response | 0.041436 |
| BP | negative regulation of G protein-coupled receptor signaling pathway | 0.042476 |
| BP | negative regulation of calcineurin-NFAT signaling cascade | 0.045244 |
| BP | androgen metabolic process | 0.050756 |
| BP | positive regulation of DNA binding | 0.050756 |
| BP | negative regulation of anoikis | 0.0535 |
| BP | positive regulation of cell population proliferation | 0.058221 |
| BP | regulation of glucose metabolic process | 0.0644 |
| BP | cell surface receptor signaling pathway | 0.065636 |
| BP | positive regulation of apoptotic process | 0.066122 |
| BP | innate immune response | 0.068916 |
| BP | cell population proliferation | 0.071465 |
| BP | autophagy | 0.076407 |
| BP | localization | 0.083178 |
| BP | face morphogenesis | 0.088475 |
| BP | extracellular matrix organization | 0.089216 |
| BP | cellular response to fibroblast growth factor stimulus | 0.091112 |
| BP | zymogen activation | 0.091112 |
| BP | protein phosphorylation | 0.094756 |
| BP | endothelial cell migration | 0.098978 |
| BP | cell division | 0.099959 |
| CC | extracellular region | 3.65E-05 |
| CC | extracellular space | 0.001086 |
| CC | extracellular exosome | 0.002946 |
| CC | collagen-containing extracellular matrix | 0.005442 |
| CC | external side of plasma membrane | 0.006702 |
| CC | cytoplasm | 0.030523 |
| CC | focal adhesion | 0.032594 |
| CC | protein -containing complex | 0.040969 |
| CC | secretory granule lumen | 0.041312 |
| CC | mitochondrion | 0.051739 |
| CC | cytosol | 0.079849 |
| MF | protein binding | 6. 14E-04 |
| MF | calcium-dependent protein binding | 0.001832 |
| MF | identical protein binding | 0.004203 |
| MF | signaling receptor binding | 0.004608 |
| MF | protein homodimerization activity | 0.006349 |
| MF | protein-disulfide reductase (NAD(P)H) activity | 0.008833 |
| MF | collagen binding | 0.017708 |
| MF | RAGE receptor binding | 0.037725 |
| MF | extracellular matrix binding | 0.093048 |

| KEGG | Cell cycle | 0.004967 |
| --- | --- | --- |
| KEGG | Hepatitis B | 0 005545 |
| KEGG | Diabetic cardiomyopathy | 0 01225 |
| KEGG | Human T-cell leukemia virus 1 infection | 0.016249 |
| KEGG | Oocyte meiosis | 0.023019 |
| KEGG | Cell adhesion molecules | 0 031503 |
| KEGG | Influenza A | 0.039669 |
| KEGG | Viral carcinogenesis | 0.061038 |
| KEGG | Rheumatoid arthritis | 0 064313 |
| KEGG | IL-17 signaling pathway | 0 065518 |
| KEGG | Hematopoietic cell lineage | 0.070411 |
| KEGG | Toll-like receptor signaling pathway | 0.083146 |

**Supplementary** **Table** **S7:** All gene-drug association results

| Term | P-value | Odds Ratio | Combined Score | Genes |
| --- | --- | --- | --- | --- |
| GLYOXAL CTD 00006046 | 5.50E-04 | 19989 | 150029.821 | CXCL8 |
| Leupeptin CTD 00001574 | 5.50E-04 | 19989 | 150029.821 | CXCL8 |
| 6401-97-4 CTD 00000925 | 5.50E-04 | 19989 | 150029.821 | CXCL8 |
| Chromium (Iii) Chloride CTD 00001073 | 5.50E-04 | 19989 | 150029.821 | CXCL8 |
| glutaraldehyde CTD 00006033 | 5.50E-04 | 19989 | 150029.821 | CXCL8 |
| amoxicillin CTD 00005390 | 5.50E-04 | 19989 | 150029.821 | CXCL8 |
| Diatrizoic acid CTD 00005787 | 5.50E-04 | 19989 | 150029.821 | CXCL8 |
| Beclomethasone 17-monopropionate CTD 00002649 | 5.50E-04 | 19989 | 150029.821 | CXCL8 |
| proscillaridin CTD 00006639 | 5.50E-04 | 19989 | 150029.821 | CXCL8 |
| ibuprofen TTD 00008500 | 5.50E-04 | 19989 | 150029.821 | CXCL8 |
| BENZOYL PEROXIDE CTD 00005495 | 5.50E-04 | 19989 | 150029.821 | CXCL8 |
| 3-Nitrobenzanthrone CTD 00003634 | 5.50E-04 | 19989 | 150029.821 | CXCL8 |
| KT 5720 CTD 00002405 | 6.00E-04 | 19988 | 148283. 1196 | CXCL8 |
| FERRIC CITRATE CTD 00001186 | 6.00E-04 | 19988 | 148283. 1196 | CXCL8 |
| Oxibendazole CTD 00000598 | 6.00E-04 | 19988 | 148283. 1196 | CXCL8 |
| PLATINUM CTD 00006576 | 6.00E-04 | 19988 | 148283. 1196 | CXCL8 |
| 3-NITROFLUORANTHENE CTD 00001617 | 6.00E-04 | 19988 | 148283. 1196 | CXCL8 |
| hyperforin CTD 00000051 | 6.00E-04 | 19988 | 148283. 1196 | CXCL8 |
| IMD-0354 CTD 00004363 | 6.50E-04 | 19987 | 146675.8762 | CXCL8 |
| penicillin g CTD 00006476 | 6.50E-04 | 19987 | 146675.8762 | CXCL8 |
| 1, 1, 1-trifluorohenicosa-6,9, 12, 15-tetraen-2-one CTD  00002973 | 6.50E-04 | 19987 | 146675.8762 | CXCL8 |
| lauric acid CTD 00001439 | 6.50E-04 | 19987 | 146675.8762 | CXCL8 |
| roxithromycin CTD 00007073 | 6.50E-04 | 19987 | 146675.8762 | CXCL8 |
| methylglyoxal CTD 00006677 | 7.00E-04 | 19986 | 145187.4054 | CXCL8 |
| 9-(2-Phosphonomethoxypropyl)adenine CTD  00003259 | 7.00E-04 | 19986 | 145187.4054 | CXCL8 |
| moxifloxacin CTD 00003427 | 7.00E-04 | 19986 | 145187.4054 | CXCL8 |
| CHLOROFORM CTD 00005639 | 7.00E-04 | 19986 | 145187.4054 | CXCL8 |
| POVPC CTD 00003737 | 7.50E-04 | 19985 | 143801.3089 | CXCL8 |
| TITANIUM CTD 00006899 | 7.50E-04 | 19985 | 143801.3089 | CXCL8 |
| pd 168393 CTD 00004570 | 7.50E-04 | 19985 | 143801.3089 | CXCL8 |
| alexidine CTD 00000048 | 8.00E-04 | 19984 | 142504.3668 | CXCL8 |
| 2-Aminophenol CTD 00001297 | 8.00E-04 | 19984 | 142504.3668 | CXCL8 |
| 1,3-Dimethylthiourea CTD 00001818 | 8.00E-04 | 19984 | 142504.3668 | CXCL8 |
| thymidine CTD 00006888 | 8.00E-04 | 19984 | 142504.3668 | CXCL8 |
| CHLOROBENZENE CTD 00001495 | 8.00E-04 | 19984 | 142504.3668 | CXCL8 |
| 73151-67-4 CTD 00006204 | 8.00E-04 | 19984 | 142504.3668 | CXCL8 |
| Desloratadine CTD 00003720 | 8.00E-04 | 19984 | 142504.3668 | CXCL8 |
| PYRENE CTD 00001472 | 8.00E-04 | 19984 | 142504.3668 | CXCL8 |
| hydroquinone TTD 00008479 | 8.00E-04 | 19984 | 142504.3668 | CXCL8 |
| sodium chloride CTD 00006751 | 8.00E-04 | 19984 | 142504.3668 | CXCL8 |
| terbinafine CTD 00001890 | 8.00E-04 | 19984 | 142504.3668 | CXCL8 |
| Palmatine CTD 00000225 | 8.50E-04 | 19983 | 141285.7658 | CXCL8 |
| flunitrazepam CTD 00005980 | 8.50E-04 | 19983 | 141285.7658 | CXCL8 |
| pyrilamine CTD 00006669 | 8.50E-04 | 19983 | 141285.7658 | CXCL8 |
| 5'-N-Ethylcarboxamidoadenosine CTD 00007322 | 8.50E-04 | 19983 | 141285.7658 | CXCL8 |
| leukotriene D4 CTD 00007224 | 8.50E-04 | 19983 | 141285.7658 | CXCL8 |
| Calpain inhibitor I CTD 00002578 | 8.50E-04 | 19983 | 141285.7658 | CXCL8 |
| 8-OH-Dpat CTD 00007178 | 8.50E-04 | 19983 | 141285.7658 | CXCL8 |
| betamethasone CTD 00005504 | 8.50E-04 | 19983 | 141285.7658 | CXCL8 |
| puromycin CTD 00006652 | 8.50E-04 | 19983 | 141285.7658 | CXCL8 |
| Tosyllysyl chloromethane CTD 00006909 | 8.50E-04 | 19983 | 141285.7658 | CXCL8 |
| Temsirolimus CTD 00003745 | 8.50E-04 | 19983 | 141285.7658 | CXCL8 |
| candesartan CTD 00002974 | 9.00E-04 | 19982 | 140136.5484 | CXCL8 |

| Peroxynitrous acid CTD 00007400 | 9.00E-04 | 19982 | 140136.5484 | CXCL8 |
| --- | --- | --- | --- | --- |
| diphenhydramine CTD 00005854 | 9.00E-04 | 19982 | 140136.5484 | CXCL8 |
| Oligomycin CTD 00006434 | 9.00E-04 | 19982 | 140136.5484 | CXCL8 |
| 2-arachidonoylglycerol CTD 00003218 | 9.00E-04 | 19982 | 140136.5484 | CXCL8 |
| retinol TTD 00010558 | 9.00E-04 | 19982 | 140136.5484 | CXCL8 |
| hesperidin CTD 00006087 | 9.00E-04 | 19982 | 140136.5484 | CXCL8 |
| fenoterol CTD 00005963 | 9.00E-04 | 19982 | 140136.5484 | CXCL8 |
| kn-93 CTD 00002783 | 9.50E-04 | 19981 | 139049.211 | CXCL8 |
| 1,8,9-Trihydroxyanthracene CTD 00005413 | 9.50E-04 | 19981 | 139049.211 | CXCL8 |
| Trimethyl-beta-cyclodextrin CTD 00003512 | 9.50E-04 | 19981 | 139049.211 | CXCL8 |
| doxycycline CTD 00005875 | 9.50E-04 | 19981 | 139049.211 | CXCL8 |
| prazosin CTD 00006604 | 9.50E-04 | 19981 | 139049.211 | CXCL8 |
| dequalinium CTD 00005770 | 9.50E-04 | 19981 | 139049.211 | CXCL8 |
| EIPA CTD 00001833 | 9.50E-04 | 19981 | 139049.211 | CXCL8 |
| Goniothalamin CTD 00003401 | 1.00E-03 | 19980 | 138017.4051 | CXCL8 |
| cytochalasin D CTD 00007076 | 1.00E-03 | 19980 | 138017.4051 | CXCL8 |
| methylprednisolone CTD 00006322 | 1.00E-03 | 19980 | 138017.4051 | CXCL8 |
| CP-690334-01 PC3 DOWN | 1.00E-03 | 19980 | 138017.4051 | CXCL8 |
| domperidone PC3 UP | 1.00E-03 | 19980 | 138017.4051 | CXCL8 |
| DIETHYL PHTHALATE CTD 00000348 | 1.00E-03 | 19980 | 138017.4051 | CXCL8 |
| Sodium salicylate CTD 00006761 | 1.00E-03 | 19980 | 138017.4051 | CXCL8 |
| myricetin HL60 UP | 1.00E-03 | 19980 | 138017.4051 | CXCL8 |
| chlordane CTD 00005630 | 1.00E-03 | 19980 | 138017.4051 | CXCL8 |
| 2,2',4,6,6'-pentachlorobiphenyl CTD 00003860 | 1.00E-03 | 19980 | 138017.4051 | CXCL8 |
| formoterol CTD 00000665 | 0.00105 | 19979 | 137035.7122 | CXCL8 |
| Ketanserin CTD 00006189 | 0.00105 | 19979 | 137035.7122 | CXCL8 |
| harmaline CTD 00006074 | 0.00105 | 19979 | 137035.7122 | CXCL8 |
| ethinyl estradiol TTD 00007915 | 0.00105 | 19979 | 137035.7122 | CXCL8 |
| Polydatin CTD 00002437 | 0.00105 | 19979 | 137035.7122 | CXCL8 |
| pioglitazone PC3 DOWN | 0.0011 | 19978 | 136099.4703 | CXCL8 |
| aldrin CTD 00005348 | 0.0011 | 19978 | 136099.4703 | CXCL8 |
| triprolidine PC3 UP | 0.0011 | 19978 | 136099.4703 | CXCL8 |
| Muramyl Dipeptide CTD 00005307 | 0.0011 | 19978 | 136099.4703 | CXCL8 |
| dimethoate CTD 00005841 | 0.0011 | 19978 | 136099.4703 | CXCL8 |
| 7-Ketocholesterol CTD 00000104 | 0.0011 | 19978 | 136099.4703 | CXCL8 |
| dicycloverine PC3 UP | 0.0011 | 19978 | 136099.4703 | CXCL8 |
| Sirtinol CTD 00003986 | 0.0011 | 19978 | 136099.4703 | CXCL8 |
| labetalol HL60 UP | 0.0011 | 19978 | 136099.4703 | CXCL8 |
| indomethacin | 0.00115 | 19977 | 135204.6392 | CXCL8 |
| tracazolate HL60 DOWN | 0.00115 | 19977 | 135204.6392 | CXCL8 |
| IN1541 CTD 00001481 | 0.00115 | 19977 | 135204.6392 | CXCL8 |
| PHENANTHRENE CTD 00001483 | 0.00115 | 19977 | 135204.6392 | CXCL8 |
| pyrogallol TTD 00010426 | 0.00115 | 19977 | 135204.6392 | CXCL8 |
| MLS003115428 CTD 00005749 | 0.0012 | 19976 | 134347.6949 | CXCL8 |
| 81103- 11-9 CTD 00007157 | 0.0012 | 19976 | 134347.6949 | CXCL8 |
| Prolinedithiocarbamate CTD 00002658 | 0.0012 | 19976 | 134347.6949 | CXCL8 |
| fenbendazole CTD 00005958 | 0.0012 | 19976 | 134347.6949 | CXCL8 |
| 4-Nitrophenol CTD 00001160 | 0.0012 | 19976 | 134347.6949 | CXCL8 |
| pantothenic acid CTD 00006468 | 0.0012 | 19976 | 134347.6949 | CXCL8 |
| S- 1,2-Dichlorovinyl-N-acetylcysteine CTD  00002159 | 0.0012 | 19976 | 134347.6949 | CXCL8 |
| STOCK1N-35874 PC3 UP | 0.0012 | 19976 | 134347.6949 | CXCL8 |
| montelukast CTD 00003205 | 0.0012 | 19976 | 134347.6949 | CXCL8 |
| HEXANE CTD 00001239 | 0.0012 | 19976 | 134347.6949 | CXCL8 |
| phosphate CTD 00006536 | 0.00125 | 19975 | 133525.5449 | CXCL8 |
| clonidine CTD 00005689 | 0.00125 | 19975 | 133525.5449 | CXCL8 |
| Sphingosine 1-phosphate CTD 00002508 | 0.00125 | 19975 | 133525.5449 | CXCL8 |
| dapsone CTD 00005751 | 0.00125 | 19975 | 133525.5449 | CXCL8 |

| 1,4-NAPHTHOQUINONE CTD 00001683 | 0.00125 | 19975 | 133525.5449 | CXCL8 |
| --- | --- | --- | --- | --- |
| 25-Hydroxycholesterol CTD 00000381 | 0.00125 | 19975 | 133525.5449 | CXCL8 |
| EMETINE CTD 00005892 | 0.00125 | 19975 | 133525.5449 | CXCL8 |
| bleomycin CTD 00005517 | 0.00125 | 19975 | 133525.5449 | CXCL8 |
| mebendazole CTD 00006249 | 0.00125 | 19975 | 133525.5449 | CXCL8 |
| lasalocid PC3 UP | 0.00125 | 19975 | 133525.5449 | CXCL8 |
| nitroglycerin CTD 00006039 | 0.00125 | 19975 | 133525.5449 | CXCL8 |
| pyrogallol BOSS | 0.0013 | 19974 | 132735.4607 | CXCL8 |
| Antimycin A CTD 00005427 | 0.0013 | 19974 | 132735.4607 | CXCL8 |
| metixene PC3 UP | 0.0013 | 19974 | 132735.4607 | CXCL8 |
| nicotinamide CTD 00006391 | 0.0013 | 19974 | 132735.4607 | CXCL8 |
| AC1L1KON CTD 00000061 | 0.00135 | 19973 | 131975.023 | CXCL8 |
| CP-55940 CTD 00002329 | 0.00135 | 19973 | 131975.023 | CXCL8 |
| dacarbazine CTD 00005747 | 0.00135 | 19973 | 131975.023 | CXCL8 |
| Galangin CTD 00001740 | 0.00135 | 19973 | 131975.023 | CXCL8 |
| bisindolylmaleimide IX CTD 00002617 | 0.00135 | 19973 | 131975.023 | CXCL8 |
| terbutaline CTD 00006840 | 0.00135 | 19973 | 131975.023 | CXCL8 |
| Dienogest CTD 00001099 | 0.00135 | 19973 | 131975.023 | CXCL8 |
| Digoxigenin CTD 00005824 | 0.0014 | 19972 | 131242.0762 | CXCL8 |
| retinal CTD 00006694 | 0.0014 | 19972 | 131242.0762 | CXCL8 |
| cerivastatin CTD 00003073 | 0.0014 | 19972 | 131242.0762 | CXCL8 |
| PROPIDIUM CTD 00006632 | 0.0014 | 19972 | 131242.0762 | CXCL8 |
| prochlorperazine PC3 UP | 0.00145 | 19971 | 130534.6917 | CXCL8 |
| lidocaine CTD 00006207 | 0.00145 | 19971 | 130534.6917 | CXCL8 |
| Cladribine CTD 00007175 | 0.00145 | 19971 | 130534.6917 | CXCL8 |
| dichlorvos CTD 00004426 | 0.00145 | 19971 | 130534.6917 | CXCL8 |
| cefalexin HL60 DOWN | 0.00145 | 19971 | 130534.6917 | CXCL8 |
| hydrocotarnine HL60 DOWN | 0.00145 | 19971 | 130534.6917 | CXCL8 |
| ICN 1229 CTD 00006697 | 0.00145 | 19971 | 130534.6917 | CXCL8 |
| lanatoside C CTD 00000952 | 0.00145 | 19971 | 130534.6917 | CXCL8 |
| primaquine HL60 UP | 0.0015 | 19970 | 129851. 1373 | CXCL8 |
| bepridil PC3 UP | 0.0015 | 19970 | 129851. 1373 | CXCL8 |
| Digitoxigenin CTD 00005821 | 0.0015 | 19970 | 129851. 1373 | CXCL8 |
| pyrogallol CTD 00006673 | 0.0015 | 19970 | 129851. 1373 | CXCL8 |
| dicumarol CTD 00005515 | 0.0015 | 19970 | 129851. 1373 | CXCL8 |
| homochlorcyclizine PC3 UP | 0.0015 | 19970 | 129851. 1373 | CXCL8 |
| 2,4-Diisocyanato- 1-methylbenzene CTD 00006908 | 0.00155 | 19969 | 129189.851 | CXCL8 |
| peptidoglycan CTD 00006490 | 0.00155 | 19969 | 129189.851 | CXCL8 |
| ALUMINUM CTD 00005362 | 0.00155 | 19969 | 129189.851 | CXCL8 |
| L 741211 CTD 00003280 | 0.00155 | 19969 | 129189.851 | CXCL8 |
| cyproheptadine PC3 UP | 0.00155 | 19969 | 129189.851 | CXCL8 |
| patulin CTD 00006474 | 0.00155 | 19969 | 129189.851 | CXCL8 |
| methimazole CTD 00006291 | 0.00155 | 19969 | 129189.851 | CXCL8 |
| Cobalt sulfate CTD 00001238 | 0.0016 | 19968 | 128549.4196 | CXCL8 |
| minocycline CTD 00006338 | 0.0016 | 19968 | 128549.4196 | CXCL8 |
| chloroquine CTD 00005645 | 0.0016 | 19968 | 128549.4196 | CXCL8 |
| 27-hydroxycholesterol CTD 00002877 | 0.0016 | 19968 | 128549.4196 | CXCL8 |
| 141-05-9 CTD 00000755 | 0.0016 | 19968 | 128549.4196 | CXCL8 |
| alpha-Hexylcinnamaldehyde CTD 00002937 | 0.00165 | 19967 | 127928.5603 | CXCL8 |
| 3-Aminofluoranthene CTD 00002071 | 0.00165 | 19967 | 127928.5603 | CXCL8 |
| Pemetrexed CTD 00003054 | 0.00165 | 19967 | 127928.5603 | CXCL8 |
| EGTA CTD 00005889 | 0.00165 | 19967 | 127928.5603 | CXCL8 |
| dobutamine CTD 00005866 | 0.00165 | 19967 | 127928.5603 | CXCL8 |
| Riboflavine CTD 00006698 | 0.00165 | 19967 | 127928.5603 | CXCL8 |
| promethazine PC3 UP | 0.0017 | 19966 | 127326. 1054 | CXCL8 |
| Benzyl butyl phthalate CTD 00001292 | 0.0017 | 19966 | 127326. 1054 | CXCL8 |
| MANCOZEB CTD 00000687 | 0.0017 | 19966 | 127326. 1054 | CXCL8 |
| vanillin CTD 00003324 | 0.0017 | 19966 | 127326. 1054 | CXCL8 |

| POLY I-C CTD 00006579 | 0.0017 | 19966 | 127326. 1054 | CXCL8 |
| --- | --- | --- | --- | --- |
| diazepam CTD 00005789 | 0.0017 | 19966 | 127326. 1054 | CXCL8 |
| chelerythrine CTD 00000834 | 0.0017 | 19966 | 127326. 1054 | CXCL8 |
| chloropyramine PC3 UP | 0.0017 | 19966 | 127326. 1054 | CXCL8 |
| Geranylgeranyl pyrophosphate CTD 00000102 | 0.0017 | 19966 | 127326. 1054 | CXCL8 |
| fluticasone CTD 00002635 | 0.0017 | 19966 | 127326. 1054 | CXCL8 |
| heptachlor CTD 00006083 | 0.0017 | 19966 | 127326. 1054 | CXCL8 |
| N-formylmethionylleucylphenylalanine CTD  00006360 | 0.00175 | 19965 | 126740.9886 | CXCL8 |
| Methylbenzethonium chloride CTD 00000197 | 0.00175 | 19965 | 126740.9886 | CXCL8 |
| oxozinc CTD 00007012 | 0.00175 | 19965 | 126740.9886 | CXCL8 |
| ciprofloxacin CTD 00005674 | 0.0018 | 19964 | 126172.2336 | CXCL8 |
| hydrochloric acid CTD 00006115 | 0.0018 | 19964 | 126172.2336 | CXCL8 |
| benzethonium chloride HL60 DOWN | 0.0018 | 19964 | 126172.2336 | CXCL8 |
| palmitic acid CTD 00007272 | 0.0018 | 19964 | 126172.2336 | CXCL8 |
| emodin TTD 00007826 | 0.0018 | 19964 | 126172.2336 | CXCL8 |
| cinnamyl alcohol CTD 00001006 | 0.0018 | 19964 | 126172.2336 | CXCL8 |
| ethinyl estradiol | 0.00185 | 19963 | 125618.9446 | CXCL8 |
| STOCK1N-35696 PC3 UP | 0.00185 | 19963 | 125618.9446 | CXCL8 |
| 4-Aminobenzohydrazide CTD 00001642 | 0.0019 | 19962 | 125080.2973 | CXCL8 |
| OZONE CTD 00006460 | 0.0019 | 19962 | 125080.2973 | CXCL8 |
| pyrantel HL60 UP | 0.00195 | 19961 | 124555.5316 | CXCL8 |
| colchicine | 0.00195 | 19961 | 124555.5316 | CXCL8 |
| tubocurarine CTD 00006958 | 0.00195 | 19961 | 124555.5316 | CXCL8 |
| 1,2-NAPHTHOQUINONE CTD 00001871 | 0.00195 | 19961 | 124555.5316 | CXCL8 |
| erythromycin CTD 00005916 | 0.00195 | 19961 | 124555.5316 | CXCL8 |
| Ammonium hexachloroplatinate(IV) CTD  00000945 | 0.00195 | 19961 | 124555.5316 | CXCL8 |
| ethinyl estradiol BOSS | 0.00195 | 19961 | 124555.5316 | CXCL8 |
| hesperidin HL60 UP | 0.00195 | 19961 | 124555.5316 | CXCL8 |
| Bandrowski's base CTD 00002216 | 0.002 | 19960 | 124043.9452 | CXCL8 |
| tacrine HL60 UP | 0.002 | 19960 | 124043.9452 | CXCL8 |
| hydroquinone BOSS | 0.002 | 19960 | 124043.9452 | CXCL8 |
| IVERMECTIN CTD 00006182 | 0.002 | 19960 | 124043.9452 | CXCL8 |
| FLUORANTHENE CTD 00000365 | 0.00205 | 19959 | 123544.8878 | CXCL8 |
| 1-butanol CTD 00007334 | 0.00205 | 19959 | 123544.8878 | CXCL8 |
| Sunitinib CTD 00004175 | 0.00205 | 19959 | 123544.8878 | CXCL8 |
| Salbutamol CTD 00005336 | 0.00205 | 19959 | 123544.8878 | CXCL8 |
| LY-294002 PC3 DOWN | 0.00205 | 19959 | 123544.8878 | CXCL8 |
| RUTIN CTD 00006712 | 0.00205 | 19959 | 123544.8878 | CXCL8 |
| benzethonium chloride CTD 00005485 | 0.00205 | 19959 | 123544.8878 | CXCL8 |
| CHEMBL35349 CTD 00001274 | 0.00205 | 19959 | 123544.8878 | CXCL8 |
| resveratrol PC3 DOWN | 0.0021 | 19958 | 123057.7561 | CXCL8 |
| rimexolone HL60 DOWN | 0.0021 | 19958 | 123057.7561 | CXCL8 |
| naphthalene CTD 00001527 | 0.0021 | 19958 | 123057.7561 | CXCL8 |
| naringenin CTD 00000211 | 0.0021 | 19958 | 123057.7561 | CXCL8 |
| tert-Butylhydroquinone CTD 00000961 | 0.0021 | 19958 | 123057.7561 | CXCL8 |
| Acteoside CTD 00002463 | 0.0021 | 19958 | 123057.7561 | CXCL8 |
| zafirlukast CTD 00002560 | 0.00215 | 19957 | 122581.9894 | CXCL8 |
| securinine HL60 UP | 0.0022 | 19956 | 122117.0656 | CXCL8 |
| dibutyl phthalate CTD 00005795 | 0.0022 | 19956 | 122117.0656 | CXCL8 |
| Acetovanillone CTD 00002374 | 0.0022 | 19956 | 122117.0656 | CXCL8 |
| etynodiol HL60 DOWN | 0.0022 | 19956 | 122117.0656 | CXCL8 |
| STYRENE CTD 00001125 | 0.0022 | 19956 | 122117.0656 | CXCL8 |
| 139890-68-9 CTD 00002746 | 0.00225 | 19955 | 121662.4978 | CXCL8 |
| 22-Hydroxycholesterol CTD 00000121 | 0.00225 | 19955 | 121662.4978 | CXCL8 |
| serotonin CTD 00006734 | 0.00225 | 19955 | 121662.4978 | CXCL8 |
| capsazepine CTD 00002764 | 0.00225 | 19955 | 121662.4978 | CXCL8 |

| berberine CTD 00005500 | 0.00225 | 19955 | 121662.4978 | CXCL8 |
| --- | --- | --- | --- | --- |
| 2,2',3,4,4',5,5'-HEPTACHLOROBIPHENYL CTD 00003812 | 0.00225 | 19955 | 121662.4978 | CXCL8 |
| fenoterol PC3 UP | 0.00225 | 19955 | 121662.4978 | CXCL8 |
| catechol CTD 00001636 | 0.0023 | 19954 | 121217.8313 | CXCL8 |
| cloperastine PC3 UP | 0.0023 | 19954 | 121217.8313 | CXCL8 |
| colchicine SKMEL5 UP | 0.0023 | 19954 | 121217.8313 | CXCL8 |
| DEHP CTD 00005816 | 0.0023 | 19954 | 121217.8313 | CXCL8 |
| AMILORIDE CTD 00005369 | 0.00235 | 19953 | 120782.6407 | CXCL8 |
| 1,4-chrysenequinone HL60 UP | 0.00235 | 19953 | 120782.6407 | CXCL8 |
| T-2 TOXIN CTD 00006824 | 0.00235 | 19953 | 120782.6407 | CXCL8 |
| 2-Mercaptobenzothiazole CTD 00000240 | 0.00235 | 19953 | 120782.6407 | CXCL8 |
| Cardidigin CTD 00005822 | 0.00235 | 19953 | 120782.6407 | CXCL8 |
| p-benzoquinone CTD 00000148 | 0.00235 | 19953 | 120782.6407 | CXCL8 |
| loxapine PC3 UP | 0.00235 | 19953 | 120782.6407 | CXCL8 |
| pizotifen PC3 UP | 0.0024 | 19952 | 120356.5273 | CXCL8 |
| BUTHIONINE SULFOXIMINE CTD 00007280 | 0.0024 | 19952 | 120356.5273 | CXCL8 |
| butyric acid CTD 00007353 | 0.0024 | 19952 | 120356.5273 | CXCL8 |
| lansoprazole CTD 00007481 | 0.0024 | 19952 | 120356.5273 | CXCL8 |
| lactacystin CTD 00002698 | 0.00245 | 19951 | 119939. 1172 | CXCL8 |
| DICHLOROMETHANE CTD 00006313 | 0.00245 | 19951 | 119939. 1172 | CXCL8 |
| EMBELIN CTD 00000580 | 0.00245 | 19951 | 119939. 1172 | CXCL8 |
| perphenazine PC3 UP | 0.0025 | 19950 | 119530.0592 | CXCL8 |
| oxytetracycline CTD 00006459 | 0.0025 | 19950 | 119530.0592 | CXCL8 |
| ETHYLBENZENE CTD 00000178 | 0.0025 | 19950 | 119530.0592 | CXCL8 |
| O-XYLENE CTD 00001228 | 0.0025 | 19950 | 119530.0592 | CXCL8 |
| Elesclomol CTD 00004602 | 0.0025 | 19950 | 119530.0592 | CXCL8 |
| mycophenolic acid CTD 00006358 | 0.0025 | 19950 | 119530.0592 | CXCL8 |
| cholesterol CTD 00005658 | 0.0025 | 19950 | 119530.0592 | CXCL8 |
| Leptomycin B CTD 00001805 | 0.0025 | 19950 | 119530.0592 | CXCL8 |
| (+)-chelidonine HL60 DOWN | 0.0025 | 19950 | 119530.0592 | CXCL8 |
| geldanamycin CTD 00000033 | 0.0025 | 19950 | 119530.0592 | CXCL8 |
| oleic acid CTD 00007269 | 0.00255 | 19949 | 119129.0229 | CXCL8 |
| budesonide CTD 00007317 | 0.00255 | 19949 | 119129.0229 | CXCL8 |
| parthenolide CTD 00000087 | 0.00255 | 19949 | 119129.0229 | CXCL8 |
| astemizole HL60 UP | 0.00255 | 19949 | 119129.0229 | CXCL8 |
| MK 886 CTD 00002517 | 0.00255 | 19949 | 119129.0229 | CXCL8 |
| securinine PC3 UP | 0.0026 | 19948 | 118735.697 | CXCL8 |
| suloctidil PC3 UP | 0.0026 | 19948 | 118735.697 | CXCL8 |
| norepinephrine CTD 00006417 | 0.0026 | 19948 | 118735.697 | CXCL8 |
| Melitten CTD 00006261 | 0.00265 | 19947 | 118349.7882 | CXCL8 |
| pyrvinium PC3 UP | 0.00265 | 19947 | 118349.7882 | CXCL8 |
| p-Phenylenediamine CTD 00001400 | 0.0027 | 19946 | 117971.0196 | CXCL8 |
| CHEBI:18224 CTD 00001728 | 0.0027 | 19946 | 117971.0196 | CXCL8 |
| trimipramine PC3 UP | 0.0027 | 19946 | 117971.0196 | CXCL8 |
| ethaverine HL60 DOWN | 0.0027 | 19946 | 117971.0196 | CXCL8 |
| 2,4-Dinitrofluorobenzene CTD 00005849 | 0.0027 | 19946 | 117971.0196 | CXCL8 |
| nicotinic acid CTD 00006387 | 0.00275 | 19945 | 117599. 1295 | CXCL8 |
| Fisetin CTD 00000919 | 0.0028 | 19944 | 117233.8702 | CXCL8 |
| LITHIUM CTD 00006220 | 0.0028 | 19944 | 117233.8702 | CXCL8 |
| Paricalcitol CTD 00003033 | 0.00285 | 19943 | 116875.0074 | CXCL8 |
| FERROUS SULFATE CTD 00001009 | 0.00285 | 19943 | 116875.0074 | CXCL8 |
| orlistat CTD 00002339 | 0.00285 | 19943 | 116875.0074 | CXCL8 |
| quinisocaine PC3 UP | 0.0029 | 19942 | 116522.3189 | CXCL8 |
| alpha-Tocopherol CTD 00007387 | 0.0029 | 19942 | 116522.3189 | CXCL8 |
| TACROLIMUS MONOHYDRATE CTD  00007118 | 0.0029 | 19942 | 116522.3189 | CXCL8 |
| GW9662 CTD 00004071 | 0.0029 | 19942 | 116522.3189 | CXCL8 |

| gossypol PC3 UP | 0.0029 | 19942 | 116522.3189 | CXCL8 |
| --- | --- | --- | --- | --- |
| nocodazole CTD 00007087 | 0.0029 | 19942 | 116522.3189 | CXCL8 |
| DL-Homocysteine CTD 00006102 | 0.00295 | 19941 | 116175.5939 | CXCL8 |
| Caffeic acid phenethyl ester CTD 00002352 | 0.00295 | 19941 | 116175.5939 | CXCL8 |
| sulfasalazine CTD 00006719 | 0.00295 | 19941 | 116175.5939 | CXCL8 |
| terfenadine HL60 UP | 0.003 | 19940 | 115834.6321 | CXCL8 |
| endosulfan CTD 00005896 | 0.003 | 19940 | 115834.6321 | CXCL8 |
| albendazole CTD 00007095 | 0.003 | 19940 | 115834.6321 | CXCL8 |
| mometasone PC3 UP | 0.003 | 19940 | 115834.6321 | CXCL8 |
| 1h-pyrazolo [3,4-d]pyrimidine CTD 00000742 | 0.00305 | 19939 | 115499.2434 | CXCL8 |
| cimetidine CTD 00005672 | 0.00305 | 19939 | 115499.2434 | CXCL8 |
| Electrocorundum CTD 00005364 | 0.00305 | 19939 | 115499.2434 | CXCL8 |
| Lead dichloride CTD 00001407 | 0.0031 | 19938 | 115169.2467 | CXCL8 |
| toluene CTD 00006907 | 0.0031 | 19938 | 115169.2467 | CXCL8 |
| emodin BOSS | 0.0031 | 19938 | 115169.2467 | CXCL8 |
| caffeic acid CTD 00001850 | 0.0031 | 19938 | 115169.2467 | CXCL8 |
| bisindolylmaleimide i CTD 00002749 | 0.00315 | 19937 | 114844.4697 | CXCL8 |
| digoxin CTD 00005825 | 0.00315 | 19937 | 114844.4697 | CXCL8 |
| T0901317 CTD 00003912 | 0.00315 | 19937 | 114844.4697 | CXCL8 |
| Dibenziodolium CTD 00000351 | 0.00315 | 19937 | 114844.4697 | CXCL8 |
| arecoline CTD 00005439 | 0.0032 | 19936 | 114524.7484 | CXCL8 |
| enoxaparin CTD 00006081 | 0.0032 | 19936 | 114524.7484 | CXCL8 |
| Belinostat CTD 00004313 | 0.0032 | 19936 | 114524.7484 | CXCL8 |
| Gallic acid CTD 00006020 | 0.0032 | 19936 | 114524.7484 | CXCL8 |
| Mangiferin CTD 00000713 | 0.00325 | 19935 | 114209.9261 | CXCL8 |
| thioridazine HL60 UP | 0.00325 | 19935 | 114209.9261 | CXCL8 |
| DL-Mevalonic acid CTD 00006329 | 0.00325 | 19935 | 114209.9261 | CXCL8 |
| VANADIUM PENTOXIDE CTD 00002655 | 0.00325 | 19935 | 114209.9261 | CXCL8 |
| papaverine HL60 DOWN | 0.00325 | 19935 | 114209.9261 | CXCL8 |
| syrosingopine PC3 UP | 0.0033 | 19934 | 113899.8536 | CXCL8 |
| Silybin CTD 00003999 | 0.0033 | 19934 | 113899.8536 | CXCL8 |
| colchicine BOSS | 0.0033 | 19934 | 113899.8536 | CXCL8 |
| BAS-012416453 PC3 UP | 0.0033 | 19934 | 113899.8536 | CXCL8 |
| h-89 CTD 00002586 | 0.0033 | 19934 | 113899.8536 | CXCL8 |
| Chromium(II) chloride CTD 00000877 | 0.00335 | 19933 | 113594.3881 | CXCL8 |
| beclomethasone CTD 00005468 | 0.00335 | 19933 | 113594.3881 | CXCL8 |
| UNII-9XX54M675G CTD 00004634 | 0.00335 | 19933 | 113594.3881 | CXCL8 |
| histamine CTD 00006100 | 0.0034 | 19932 | 113293.3934 | CXCL8 |
| deptropine PC3 UP | 0.0034 | 19932 | 113293.3934 | CXCL8 |
| Benz[a]anthracene CTD 00001470 | 0.00345 | 19931 | 112996.7391 | CXCL8 |
| quercetin HL60 UP | 0.0035 | 19930 | 112704.3007 | CXCL8 |
| 170449- 18-0 CTD 00003361 | 0.0035 | 19930 | 112704.3007 | CXCL8 |
| pipemidic acid PC3 DOWN | 0.00355 | 19929 | 112415.9585 | CXCL8 |
| PHOSPHINE CTD 00006547 | 0.00355 | 19929 | 112415.9585 | CXCL8 |
| Perfluorooctanesulfonic acid CTD 00002876 | 0.00355 | 19929 | 112415.9585 | CXCL8 |
| chlorprothixene PC3 UP | 0.00355 | 19929 | 112415.9585 | CXCL8 |
| Sodium dodecyl sulfate CTD 00006753 | 0.0036 | 19928 | 112131.5984 | CXCL8 |
| profenamine PC3 UP | 0.0036 | 19928 | 112131.5984 | CXCL8 |
| chlorpromazine PC3 UP | 0.0036 | 19928 | 112131.5984 | CXCL8 |
| gossypol HL60 UP | 0.0036 | 19928 | 112131.5984 | CXCL8 |
| Benzo[b]fluoranthene CTD 00000306 | 0.00365 | 19927 | 111851. 1105 | CXCL8 |
| nimesulide CTD 00000666 | 0.00365 | 19927 | 111851. 1105 | CXCL8 |
| perhexiline HL60 UP | 0.0037 | 19926 | 111574.3898 | CXCL8 |
| rottlerin CTD 00003057 | 0.0037 | 19926 | 111574.3898 | CXCL8 |
| ns-398 CTD 00002958 | 0.0037 | 19926 | 111574.3898 | CXCL8 |
| ketoconazole CTD 00006190 | 0.0037 | 19926 | 111574.3898 | CXCL8 |
| Benzo[k]fluoranthene CTD 00001069 | 0.0037 | 19926 | 111574.3898 | CXCL8 |

| TOSYLPHENYLALANYL CHLOROMETHYL KETONE CTD 00006910 | 0.00375 | 19925 | 111301.3353 | CXCL8 |
| --- | --- | --- | --- | --- |
| thiram CTD 00006883 | 0.0038 | 19924 | 111031.85 | CXCL8 |
| beta-escin PC3UP | 0.0038 | 19924 | 111031.85 | CXCL8 |
| STOCK1N-35215 PC3 UP | 0.00385 | 19923 | 110765.8407 | CXCL8 |
| primidone PC3 DOWN | 0.0039 | 19922 | 110503.218 | CXCL8 |
| morphine CTD 00006352 | 0.00395 | 19921 | 110243.8958 | CXCL8 |
| isoproterenol CTD 00006175 | 0.00395 | 19921 | 110243.8958 | CXCL8 |
| SILVER NITRATE CTD 00006743 | 0.004 | 19920 | 109987.7911 | CXCL8 |
| TRICHLOROETHYLENE CTD 00006932 | 0.00405 | 19919 | 109734.8241 | CXCL8 |
| ebselen CTD 00001949 | 0.00405 | 19919 | 109734.8241 | CXCL8 |
| ellipticine PC3 UP | 0.00405 | 19919 | 109734.8241 | CXCL8 |
| bay 11-7082 CTD 00003959 | 0.00415 | 19917 | 109237.9989 | CXCL8 |
| metformin CTD 00006282 | 0.00415 | 19917 | 109237.9989 | CXCL8 |
| DL-Selenomethionine CTD 00006732 | 0.00415 | 19917 | 109237.9989 | CXCL8 |
| NSC94017 CTD 00005320 | 0.0042 | 19916 | 108993.9952 | CXCL8 |
| SILVER CTD 00006742 | 0.0042 | 19916 | 108993.9952 | CXCL8 |
| nifedipine CTD 00006395 | 0.0043 | 19914 | 108514.461 | CXCL8 |
| chitosamine CTD 00006030 | 0.0043 | 19914 | 108514.461 | CXCL8 |
| adenine CTD 00005317 | 0.0043 | 19914 | 108514.461 | CXCL8 |
| retinol CTD 00006991 | 0.0043 | 19914 | 108514.461 | CXCL8 |
| IN1152 CTD 00001901 | 0.0044 | 19912 | 108045.7931 | CXCL8 |
| GW-8510 PC3 UP | 0.0044 | 19912 | 108045.7931 | CXCL8 |
| GNF-Pf-4325 CTD 00005408 | 0.0044 | 19912 | 108045.7931 | CXCL8 |
| 15-Acetyldeoxynivalenol CTD 00002073 | 0.00445 | 19911 | 107815.3803 | CXCL8 |
| Octa-2,4,6-trienoic acid CTD 00002551 | 0.00445 | 19911 | 107815.3803 | CXCL8 |
| Dichloromercury CTD 00006273 | 0.00445 | 19911 | 107815.3803 | CXCL8 |
| chrysin CTD 00001976 | 0.0045 | 19910 | 107587.5039 | CXCL8 |
| azacyclonol PC3 UP | 0.0045 | 19910 | 107587.5039 | CXCL8 |
| 7,8-Benzoflavone CTD 00000606 | 0.00455 | 19909 | 107362. 1078 | CXCL8 |
| SB 202190 CTD 00003161 | 0.00455 | 19909 | 107362. 1078 | CXCL8 |
| clotrimazole PC3 UP | 0.0046 | 19908 | 107139. 1381 | CXCL8 |
| bezafibrate CTD 00005506 | 0.0046 | 19908 | 107139. 1381 | CXCL8 |
| Deguelin CTD 00003487 | 0.00465 | 19907 | 106918.5424 | CXCL8 |
| Gefitinib CTD 00003879 | 0.00475 | 19905 | 106484.2718 | CXCL8 |
| valinomycin PC3 UP | 0.00475 | 19905 | 106484.2718 | CXCL8 |
| chlortetracycline PC3 DOWN | 0.00475 | 19905 | 106484.2718 | CXCL8 |
| hydrocortisone CTD 00006117 | 0.00485 | 19903 | 106058.9096 | CXCL8 |
| ciclopirox PC3 UP | 0.0049 | 19902 | 105849.455 | CXCL8 |
| rofecoxib CTD 00003631 | 0.00495 | 19901 | 105642.0931 | CXCL8 |
| Calcimycin CTD 00005287 | 0.00495 | 19901 | 105642.0931 | CXCL8 |
| ACMC-20mvek CTD 00002629 | 0.005 | 19900 | 105436.782 | CXCL8 |
| Phenethyl isothiocyanate CTD 00002443 | 0.00505 | 19899 | 105233.481 | CXCL8 |
| 1,2,4-BENZENETRIOL CTD 00000682 | 0.00505 | 19899 | 105233.481 | CXCL8 |
| amantadine HL60 DOWN | 0.0051 | 19898 | 105032. 1506 | CXCL8 |
| astemizole PC3 UP | 0.0051 | 19898 | 105032. 1506 | CXCL8 |
| phenol CTD 00007305 | 0.00515 | 19897 | 104832.7525 | CXCL8 |
| beta-carotene CTD 00007253 | 0.0052 | 19896 | 104635.2494 | CXCL8 |
| cholecalciferol CTD 00005655 | 0.0052 | 19896 | 104635.2494 | CXCL8 |
| Imatinib CTD 00003267 | 0.00525 | 19895 | 104439.6051 | CXCL8 |
| nitric oxide CTD 00006402 | 0.00525 | 19895 | 104439.6051 | CXCL8 |
| Tanshinone I CTD 00001048 | 0.0053 | 19894 | 104245.7845 | CXCL8 |
| 1, 10-phenanthroline CTD 00001181 | 0.00535 | 19893 | 104053.7534 | CXCL8 |
| 9, 10-Phenanthrenequinone CTD 00000222 | 0.00535 | 19893 | 104053.7534 | CXCL8 |
| 4-PHENYLBUTYRIC ACID CTD 00002847 | 0.0054 | 19892 | 103863.4786 | CXCL8 |
| methylbenzethonium chloride PC3 UP | 0.0054 | 19892 | 103863.4786 | CXCL8 |
| prenylamine PC3 UP | 0.00555 | 19889 | 103302.8736 | CXCL8 |
| sulforaphane CTD 00000857 | 0.00555 | 19889 | 103302.8736 | CXCL8 |

| ionomycin CTD 00007090 | 0.0056 | 19888 | 103119.3098 | CXCL8 |
| --- | --- | --- | --- | --- |
| emodin CTD 00005893 | 0.0056 | 19888 | 103119.3098 | CXCL8 |
| menadione PC3 UP | 0.00565 | 19887 | 102937.3495 | CXCL8 |
| LITHOCHOLIC ACID CTD 00006221 | 0.00575 | 19885 | 102578. 1269 | CXCL8 |
| celecoxib CTD 00003448 | 0.0058 | 19884 | 102400.8106 | CXCL8 |
| camptothecin CTD 00005566 | 0.00585 | 19883 | 102224.9893 | CXCL8 |
| 1,4-chrysenequinone PC3 UP | 0.00595 | 19881 | 101877.7308 | CXCL8 |
| deferoxamine CTD 00005759 | 0.00615 | 19877 | 101200.0793 | CXCL8 |
| Dinoprostone CTD 00007049 | 0.00635 | 19873 | 100543.7207 | CXCL8 |
| daidzein CTD 00000166 | 0.00635 | 19873 | 100543.7207 | CXCL8 |
| 0297417-0002B PC3 UP | 0.00635 | 19873 | 100543.7207 | CXCL8 |
| acetaldehyde CTD 00005293 | 0.00645 | 19871 | 100223. 1099 | CXCL8 |
| paclitaxel PC3 UP | 0.00645 | 19871 | 100223. 1099 | CXCL8 |
| DEOXYNIVALENOL CTD 00000341 | 0.0065 | 19870 | 100064.6284 | CXCL8 |
| Oxazolone CTD 00006449 | 0.0065 | 19870 | 100064.6284 | CXCL8 |
| Chromium(VI) CTD 00002830 | 0.0065 | 19870 | 100064.6284 | CXCL8 |
| thimerosal CTD 00006868 | 0.00655 | 19869 | 99907.33811 | CXCL8 |
| retinol BOSS | 0.00675 | 19865 | 99289.7334 | CXCL8 |
| glutathione CTD 00006035 | 0.0068 | 19864 | 99138. 13602 | CXCL8 |
| ursodiol CTD 00006973 | 0.0069 | 19862 | 98838. 1916 | CXCL8 |
| ACROLEIN CTD 00005313 | 0.00695 | 19861 | 98689.81333 | CXCL8 |
| colchicine CTD 00005701 | 0.007 | 19860 | 98542.47743 | CXCL8 |
| thalidomide CTD 00006858 | 0.00705 | 19859 | 98396. 16911 | CXCL8 |
| Cadmium sulfate CTD 00001745 | 0.0072 | 19856 | 97963.26643 | CXCL8 |
| cefadroxil HL60 DOWN | 0.0072 | 19856 | 97963.26643 | CXCL8 |
| TITANIUM DIOXIDE CTD 00000489 | 0.00725 | 19855 | 97820.92671 | CXCL8 |
| tonzonium bromide PC3 UP | 0.0073 | 19854 | 97679.54516 | CXCL8 |
| daunorubicin CTD 00005752 | 0.0073 | 19854 | 97679.54516 | CXCL8 |
| ellagic acid CTD 00005891 | 0.0073 | 19854 | 97679.54516 | CXCL8 |
| fulvestrant PC3 DOWN | 0.0073 | 19854 | 97679.54516 | CXCL8 |
| wortmannin CTD 00000504 | 0.0073 | 19854 | 97679.54516 | CXCL8 |
| etoposide HL60 UP | 0.00735 | 19853 | 97539. 10874 | CXCL8 |
| CHROMIUM CTD 00005668 | 0.0074 | 19852 | 97399.6047 | CXCL8 |
| VANADIUM CTD 00006979 | 0.00745 | 19851 | 97261.02052 | CXCL8 |
| Zinc acetate dihydrate CTD 00007284 | 0.00745 | 19851 | 97261.02052 | CXCL8 |
| lomustine PC3 UP | 0.00745 | 19851 | 97261.02052 | CXCL8 |
| phenoxybenzamine PC3 UP | 0.0077 | 19846 | 96581.47674 | CXCL8 |
| Vanadic sulfate CTD 00001628 | 0.00785 | 19843 | 96184.0403 | CXCL8 |
| Pyrrolidine dithiocarbamate CTD 00001021 | 0.00795 | 19841 | 95923. 18939 | CXCL8 |
| eugenol CTD 00005949 | 0.00805 | 19839 | 95665.52833 | CXCL8 |
| ellipticine HL60 DOWN | 0.00805 | 19839 | 95665.52833 | CXCL8 |
| Adehl CTD 00006002 | 0.00815 | 19837 | 95410.97867 | CXCL8 |
| cinnamaldehyde CTD 00000671 | 0.00825 | 19835 | 95159.46482 | CXCL8 |
| niclosamide PC3 UP | 0.0084 | 19832 | 94787.72753 | CXCL8 |
| arachidonic acid CTD 00007139 | 0.0084 | 19832 | 94787.72753 | CXCL8 |
| captopril HL60 DOWN | 0.0085 | 19830 | 94543.4901 | CXCL8 |
| hydroquinone CTD 00001535 | 0.0086 | 19828 | 94302.04457 | CXCL8 |
| MG- 132 CTD 00002789 | 0.00865 | 19827 | 94182.34859 | CXCL8 |
| COBALT CTD 00005696 | 0.00865 | 19827 | 94182.34859 | CXCL8 |
| ciclopirox HL60 UP | 0.00885 | 19823 | 93710.22884 | CXCL8 |
| CALCIUM CTD 00005559 | 0.0089 | 19822 | 93593.82746 | CXCL8 |
| niclosamide HL60 UP | 0.0089 | 19822 | 93593.82746 | CXCL8 |
| IRON CTD 00006166 | 0.009 | 19820 | 93362.92822 | CXCL8 |
| 1,9-Pyrazoloanthrone CTD 00003948 | 0.00905 | 19819 | 93248.41635 | CXCL8 |
| clomipramine PC3 UP | 0.0091 | 19818 | 93134.5205 | CXCL8 |
| CROTONALDEHYDE CTD 00000669 | 0.0092 | 19816 | 92908.55008 | CXCL8 |
| Copper(II) chloride CTD 00001408 | 0.0092 | 19816 | 92908.55008 | CXCL8 |
| 15-delta prostaglandin J2 HL60 UP | 0.00925 | 19815 | 92796.4624 | CXCL8 |

| NICKEL CTD 00006389 | 0.00945 | 19811 | 92353.94708 | CXCL8 |
| --- | --- | --- | --- | --- |
| actinomycin D CTD 00005748 | 0.0095 | 19810 | 92244.74636 | CXCL8 |
| ipratropium bromide HL60 DOWN | 0.0096 | 19808 | 92028.01699 | CXCL8 |
| folic acid CTD 00005997 | 0.0097 | 19806 | 91813.47871 | CXCL8 |
| ethosuximide HL60 DOWN | 0.0097 | 19806 | 91813.47871 | CXCL8 |
| valproic acid HL60 DOWN | 0.00975 | 19805 | 91707.01721 | CXCL8 |
| sanguinarine MCF7 UP | 0.0098 | 19804 | 91601.08681 | CXCL8 |
| thioridazine PC3 UP | 0.0098 | 19804 | 91601.08681 | CXCL8 |
| MANGANESE CHLORIDE CTD 00001187 | 0.0098 | 19804 | 91601.08681 | CXCL8 |
| Pentadecafluorooctanoic acid CTD 00001078 | 0.01015 | 19797 | 90874.00322 | CXCL8 |
| monobenzone PC3 DOWN | 0.0102 | 19796 | 90772. 13466 | CXCL8 |
| Capsaicin CTD 00005570 | 0.0103 | 19794 | 90569.84934 | CXCL8 |
| dimethyl sulfoxide CTD 00005842 | 0.01035 | 19793 | 90469.42323 | CXCL8 |
| Sodium dichromate CTD 00000827 | 0.0104 | 19792 | 90369.46872 | CXCL8 |
| Cube root extract CTD 00006707 | 0.01055 | 19789 | 90072.39007 | CXCL8 |
| MANGANESE CTD 00006240 | 0.01065 | 19787 | 89876.61478 | CXCL8 |
| LUCANTHONE CTD 00006227 | 0.01065 | 19787 | 89876.61478 | CXCL8 |
| PARAQUAT CTD 00006471 | 0.01065 | 19787 | 89876.61478 | CXCL8 |
| Mustard gas CTD 00006356 | 0.0107 | 19786 | 89779.39753 | CXCL8 |
| dexibuprofen PC3 DOWN | 0.01095 | 19781 | 89299.85162 | CXCL8 |
| EINECS 250-892-2 CTD 00001193 | 0.01115 | 19777 | 88923.82786 | CXCL8 |
| [6-[6-(butanoylamino)purin-9-yl]-2-hydroxy-2-oxo-  4a,  6,7,7a-tetrahydro-4H-furo[3,2-d][1,3,2] dioxaphosphinin-7-yl] butanoate CTD 00005796 | 0.0112 | 19776 | 88830.84778 | CXCL8 |
| PHENCYCLIDINE CTD 00005881 | 0.0113 | 19774 | 88646.09328 | CXCL8 |
| LY 294002 CTD 00003061 | 0.01135 | 19773 | 88554.31179 | CXCL8 |
| vinblastine CTD 00006986 | 0.01135 | 19773 | 88554.31179 | CXCL8 |
| nitrofural PC3 DOWN | 0.01155 | 19769 | 88191.07731 | CXCL8 |
| ethanol CTD 00005337 | 0.01155 | 19769 | 88191.07731 | CXCL8 |
| 1-NITROPYRENE CTD 00001569 | 0.0117 | 19766 | 87922.64429 | CXCL8 |
| gemcitabine CTD 00002382 | 0.01175 | 19765 | 87833.90991 | CXCL8 |
| spiperone PC3 UP | 0.0118 | 19764 | 87745.54195 | CXCL8 |
| hesperetin PC3 DOWN | 0.01185 | 19763 | 87657.53732 | CXCL8 |
| 3,3',4,4',5-Pentachlorobiphenyl CTD 00001077 | 0.01185 | 19763 | 87657.53732 | CXCL8 |
| 1-chloro-2,4-dinitrobenzene CTD 00005848 | 0.0121 | 19758 | 87222.85908 | CXCL8 |
| digoxigenin HL60 UP | 0.0122 | 19756 | 87051.42753 | CXCL8 |
| rapamycin CTD 00007350 | 0.01235 | 19753 | 86796.82367 | CXCL8 |
| TPEN CTD 00001994 | 0.01265 | 19747 | 86296.50629 | CXCL8 |
| ascorbic acid CTD 00005445 | 0.01305 | 19739 | 85647.04968 | CXCL8 |
| PD 98059 CTD 00003206 | 0.0131 | 19738 | 85567.23038 | CXCL8 |
| digoxin HL60 UP | 0.01335 | 19733 | 85172.5174 | CXCL8 |
| Zinc sulfate CTD 00007264 | 0.01435 | 19713 | 83662.24651 | CXCL8 |
| Allococaine CTD 00005697 | 0.0145 | 19710 | 83444.55512 | CXCL8 |
| digoxigenin PC3 UP | 0.0148 | 19704 | 83015.64282 | CXCL8 |
| OCHRATOXIN A CTD 00001202 | 0.01485 | 19703 | 82944.97742 | CXCL8 |
| helveticoside HL60 UP | 0.01505 | 19699 | 82664.6016 | CXCL8 |
| 17-Ethynyl estradiol CTD 00005932 | 0.0152 | 19696 | 82456.67783 | CXCL8 |
| simvastatin CTD 00007319 | 0.0152 | 19696 | 82456.67783 | CXCL8 |
| mitomycin C CTD 00007136 | 0.0154 | 19692 | 82182.51551 | CXCL8 |
| Fulvestrant CTD 00002740 | 0.0155 | 19690 | 82046.72439 | CXCL8 |
| N-Acetyl-L-cysteine CTD 00005305 | 0.01575 | 19685 | 81710.92181 | CXCL8 |
| MG-262 PC3 UP | 0.016 | 19680 | 81380.2383 | CXCL8 |
| 8-azaguanine PC3 UP | 0.01615 | 19677 | 81184.21953 | CXCL8 |
| cycloheximide CTD 00005731 | 0.0162 | 19676 | 81119.27114 | CXCL8 |
| helveticoside PC3 UP | 0.0162 | 19676 | 81119.27114 | CXCL8 |
| menadione HL60 UP | 0.0167 | 19666 | 80480.24449 | CXCL8 |
| mifepristone CTD 00007083 | 0.0167 | 19666 | 80480.24449 | CXCL8 |

| amikacin PC3 DOWN | 0.01675 | 19665 | 80417.36262 | CXCL8 |
| --- | --- | --- | --- | --- |
| indomethacin CTD 00006147 | 0.01675 | 19665 | 80417.36262 | CXCL8 |
| strophanthidin HL60 UP | 0.0172 | 19656 | 79859.45363 | CXCL8 |
| mebendazole HL60 UP | 0.0173 | 19654 | 79737.39093 | CXCL8 |
| MERCURY CTD 00006274 | 0.0182 | 19636 | 78668.51852 | CXCL8 |
| ( 17S)- 17-hydroxy- 13, 17-dimethyl- 1,2,6,7,8, 14, 15, 16-octahydrocyclopenta[a]phenanthren-3-one CTD  00007088 | 0.01835 | 19633 | 78495.3516 | CXCL8 |
| nocodazole HL60 UP | 0.01865 | 19627 | 78153.07894 | CXCL8 |
| cicloheximide PC3 UP | 0.0189 | 19622 | 77871.88621 | CXCL8 |
| ouabain HL60 UP | 0.01895 | 19621 | 77816.07855 | CXCL8 |
| piperlongumine HL60 DOWN | 0.01945 | 19611 | 77265.68505 | CXCL8 |
| CUPRIC OXIDE CTD 00001471 | 0.01965 | 19607 | 77049.33976 | CXCL8 |
| NICKEL CHLORIDE CTD 00001064 | 0.01995 | 19601 | 76728.77001 | CXCL8 |
| rosiglitazone CTD 00003139 | 0.02055 | 19589 | 76101.33616 | CXCL8 |
| Pentabromodiphenyl ether CTD 00003077 | 0.02075 | 19585 | 75896. 10914 | CXCL8 |
| ouabain PC3 UP | 0.0208 | 19584 | 75845. 10015 | CXCL8 |
| digitoxigenin HL60 UP | 0.02105 | 19579 | 75591.8137 | CXCL8 |
| dexamethasone CTD 00005779 | 0.02105 | 19579 | 75591.8137 | CXCL8 |
| Vorinostat CTD 00003560 | 0.02125 | 19575 | 75391.26181 | CXCL8 |
| diclofenac CTD 00005804 | 0.02135 | 19573 | 75291.66648 | CXCL8 |
| 8-azaguanine HL60 UP | 0.0214 | 19572 | 75242.03712 | CXCL8 |
| MS-275 PC3 UP | 0.02155 | 19569 | 75093.81611 | CXCL8 |
| deptropine HL60 DOWN | 0.02175 | 19565 | 74897.72559 | CXCL8 |
| carbamazepine CTD 00005574 | 0.0218 | 19564 | 74848.97418 | CXCL8 |
| strophanthidin PC3 UP | 0.02295 | 19541 | 73756.41285 | CXCL8 |
| etoposide CTD 00005948 | 0.02305 | 19539 | 73663.91135 | CXCL8 |
| theophylline CTD 00006862 | 0.0236 | 19528 | 73161.95 | CXCL8 |
| Phorbol 12-myristate 13-acetate CTD 00006852 | 0.02415 | 19517 | 72671. 11056 | CXCL8 |
| thapsigargin PC3 UP | 0.0242 | 19516 | 72627.02291 | CXCL8 |
| paclitaxel CTD 00007144 | 0.02465 | 19507 | 72234. 12677 | CXCL8 |
| 3-( 1-methylpyrrolidin-2-yl)pyridine CTD 00006393 | 0.02495 | 19501 | 71976.00596 | CXCL8 |
| Dasatinib CTD 00004330 | 0.0251 | 19498 | 71848.06141 | CXCL8 |
| lycorine PC3 UP | 0.0254 | 19492 | 71594.36039 | CXCL8 |
| oxygen CTD 00006454 | 0.0262 | 19476 | 70931.63471 | CXCL8 |
| curcumin CTD 00000663 | 0.0264 | 19472 | 70768.98943 | CXCL8 |
| trichostatin A HL60 DOWN | 0.02715 | 19457 | 70169.42194 | CXCL8 |
| puromycin PC3 UP | 0.0276 | 19448 | 69817.26303 | CXCL8 |
| POTASSIUM DICHROMATE CTD 00006598 | 0.0278 | 19444 | 69662.51227 | CXCL8 |
| aspirin CTD 00005447 | 0.02805 | 19439 | 69470.56824 | CXCL8 |
| Irinotecan hydrochloride CTD 00002224 | 0.02825 | 19435 | 69318. 19039 | CXCL8 |
| vorinostat HL60 DOWN | 0.02845 | 19431 | 69166.84332 | CXCL8 |
| NICKEL SULFATE CTD 00001417 | 0.0288 | 19424 | 68904.42357 | CXCL8 |
| enzene CTD 00005481  b | 0.03075 | 19385 | 67496.07061 | CXCL8 |
| sulpiride PC3 DOWN | 0.03085 | 19383 | 67426. 17478 | CXCL8 |
| methotrexate CTD 00006299 | 0.03095 | 19381 | 67356.49559 | CXCL8 |
| amiodarone CTD 00005381 | 0.03125 | 19375 | 67148.74409 | CXCL8 |
| troglitazone CTD 00002415 | 0.03255 | 19349 | 66270.00582 | CXCL8 |
| 8-Bromo-cAMP, Na CTD 00007044 | 0.0326 | 19348 | 66236.88311 | CXCL8 |
| raloxifene CTD 00007367 | 0.0343 | 19314 | 65138.69284 | CXCL8 |
| anisomycin MCF7 UP | 0.0359 | 19282 | 64151.66253 | CXCL8 |
| metronidazole PC3 DOWN | 0.03725 | 19255 | 63351.03909 | CXCL8 |
| doxorubicin CTD 00005874 | 0.0375 | 19250 | 63205.82512 | CXCL8 |
| cephaeline HL60 UP | 0.03835 | 19233 | 62718.92497 | CXCL8 |
| LEAD CTD 00006203 | 0.03955 | 19209 | 62048.80731 | CXCL8 |
| tamoxifen CTD 00006827 | 0.0401 | 19198 | 61748. 13768 | CXCL8 |
| ARSENIC CTD 00005442 | 0.04265 | 19147 | 60403.66798 | CXCL8 |
| lycorine HL60 UP | 0.0431 | 19138 | 60174.40763 | CXCL8 |

| Demecolcine CTD 00005762 | 0.0438 | 19124 | 59822.28406 | CXCL8 |
| --- | --- | --- | --- | --- |
| Bortezomib CTD 00003736 | 0.0439 | 19122 | 59772.41991 | CXCL8 |
| Silica CTD 00006678 | 0.0449 | 19102 | 59279.6583 | CXCL8 |
| anisomycin PC3 UP | 0.04495 | 19101 | 59255.29615 | CXCL8 |
| cimetidine PC3 DOWN | 0.04765 | 19047 | 57976.72649 | CXCL8 |
| 67526-95-8 CTD 00007263 | 0.04765 | 19047 | 57976.72649 | CXCL8 |
| phenobarbital CTD 00006510 | 0.05645 | 18871 | 54242.87653 | CXCL8 |
| trichostatin A PC3 DOWN | 0.05665 | 18867 | 54164.65187 | CXCL8 |
| menadione CTD 00007386 | 0.057 | 18860 | 54028.39145 | CXCL8 |
| CADMIUM CTD 00005555 | 0.0571 | 18858 | 53989.60672 | CXCL8 |
| anisomycin HL60 UP | 0.0571 | 18858 | 53989.60672 | CXCL8 |
| 5-Fluorouracil CTD 00005987 | 0.0601 | 18798 | 52855.2616 | CXCL8 |
| genistein CTD 00007324 | 0.06155 | 18769 | 52326.26651 | CXCL8 |
| vincristine CTD 00006988 | 0.06225 | 18755 | 52075. 14087 | CXCL8 |
| testosterone CTD 00006844 | 0.06235 | 18753 | 52039.48646 | CXCL8 |
| Arsenenous acid CTD 00000922 | 0.06415 | 18717 | 51406.89157 | CXCL8 |
| chlorzoxazone HL60 DOWN | 0.0643 | 18714 | 51354.94455 | CXCL8 |
| arsenite CTD 00000779 | 0.065 | 18700 | 51114.04839 | CXCL8 |
| glibenclamide HL60 DOWN | 0.06665 | 18667 | 50555.90573 | CXCL8 |
| TERT-BUTYL HYDROPEROXIDE CTD 00007349 | 0.06705 | 18659 | 50422.59171 | CXCL8 |
| VITAMIN E CTD 00006994 | 0.0755 | 18490 | 47771.24115 | CXCL8 |
| SELENIUM CTD 00006731 | 0.07795 | 18441 | 47055.72982 | CXCL8 |
| resveratrol CTD 00002483 | 0.08005 | 18399 | 46459.44149 | CXCL8 |
| ZINC CTD 00007011 | 0.0821 | 18358 | 45891.70001 | CXCL8 |
| 2-Methylcholine CTD 00002006 | 0.0833 | 18334 | 45565.66758 | CXCL8 |
| COPPER CTD 00005706 | 0.0844 | 18312 | 45270.75778 | CXCL8 |
| Decitabine CTD 00000750 | 0.09 | 18200 | 43824.6604 | CXCL8 |
| progesterone CTD 00006624 | 0.09575 | 18085 | 42427.72242 | CXCL8 |
| calcitriol CTD 00005558 | 0.0979 | 18042 | 41926.20355 | CXCL8 |
| (-)-Epigallocatechin gallate CTD 00002033 | 0. 1057 | 17886 | 40192.57487 | CXCL8 |
| hydrogen peroxide CTD 00006118 | 0. 13365 | 17327 | 34871. 15527 | CXCL8 |
| AFLATOXIN B1 CTD 00007128 | 0. 15405 | 16919 | 31646.64642 | CXCL8 |
| 7646-79-9 CTD 00000928 | 0. 1547 | 16906 | 31551. 14679 | CXCL8 |
| quercetin CTD 00006679 | 0. 1579 | 16842 | 31086.87909 | CXCL8 |
| formaldehyde CTD 00006001 | 0. 1596 | 16808 | 30844. 12885 | CXCL8 |
| 0175029-0000 PC3 DOWN | 0. 1663 | 16674 | 29912.54619 | CXCL8 |
| trichostatin A CTD 00000660 | 0. 1792 | 16416 | 28223.27675 | CXCL8 |
| Tetradioxin CTD 00006848 | 0. 1884 | 16232 | 27094.27983 | CXCL8 |
| acetaminophen CTD 00005295 | 0.20675 | 15865 | 25007. 14485 | CXCL8 |
| Retinoic acid CTD 00006918 | 0.2129 | 15742 | 24351.83264 | CXCL8 |
| estradiol CTD 00005920 | 0.2168 | 15664 | 23946.82753 | CXCL8 |
| benzo[a]pyrene CTD 00005488 | 0.2212 | 15576 | 23499.34134 | CXCL8 |
| cyclosporin A CTD 00007121 | 0.24125 | 15175 | 21577.67398 | CXCL8 |
| Copper sulfate CTD 00007279 | 0.3008 | 13984 | 16799. 12428 | CXCL8 |
| VALPROIC ACID CTD 00006977 | 0.4156 | 11688 | 10262.44254 | CXCL8 |
